# Supplementary material
Source: publisher figshare collection journal article supplement (https://acs.figshare.com/ndownloader/files/13890059)
Supplement: Supplementary file 1 [file 13890059]

## Sheet: SI Table S8
Supporting Information Table S8: Differentially expressed genes in BPA and MBP exposure treaments
Key:	Genes common to:	Day 5 100 & 1000 ug/L BPA (62 genes)
		Day 5 1000 ug/L BPA & 25 MBP (2 genes)
		Day 5 2.5 & 25 MBP (1 gene)
		Day 5 1000 ug/L BPA & Day 15 1000 BPA (5 genes)
	Day 5 BPA 100 ug/L					Day 5 BPA 1000 ug/L					Day 15 BPA 100 ug/L					Day 15 BPA 1000 ug/L					Day 5 MBP 2.5 ug/L					Day 5 MBP 25 ug/L					Day 15 MBP 2.5 ug/L
Gene name	Ensembl gene id	log2 Fold Change	p adjusted		Gene name	Ensembl gene id	log2 Fold Change	p adjusted		Gene name	Ensembl gene id	log2 Fold Change	p adjusted		Gene name	Ensembl gene id	log2 Fold Change	p adjusted		Gene name	Ensembl gene id	log2 Fold Change	p adjusted		Gene name	Ensembl gene id	log2 Fold Change	p adjusted		Gene name	Ensembl gene id	log2 Fold Change	p adjusted
pnp6	ENSDARG00000040942	-6.88725	3.5723e-07		syne3	ENSDARG00000023237	1.63188	5.552e-07		apoda.2	ENSDARG00000060350	21.9893	2.25368e-07		cry1ba	ENSDARG00000069074	1.64785	4.22078e-06		emilin3	ENSDARG00000078052	-2.03264	0.0177887		emilin3	ENSDARG00000078052	-6.00618	0.000208716		apof	ENSDARG00000090980	-3.64003	0.0046061
hdac7b	ENSDARG00000073850	1.13297	3.5723e-07		nr2f1a	ENSDARG00000052695	-1.58468	1.50901e-06							per1a	ENSDARG00000056885	-2.504	4.22078e-06		nkx2.3	ENSDARG00000039095	-1.3634	0.0409138		lgals2b	ENSDARG00000038153	-7.35029	2.48504e-10
uroc1	ENSDARG00000070394	-6.69416	0.000192785		zgc:153845	ENSDARG00000099238	-5.23207	2.82022e-06							ciarta	ENSDARG00000058094	-1.90561	0.000420601		jdp2	ENSDARG00000020133	-3.50565	0.0468003		cyt1l	ENSDARG00000036832	-7.89555	1.26508e-09
zgc:153639	ENSDARG00000059166	-7.57506	0.000239507		si:dkey-6n6.1	ENSDARG00000062487	-3.8142	6.21678e-06							syne3	ENSDARG00000023237	1.70645	0.000420601		fzd9b	ENSDARG00000014673	-1.92834	0.0468003		zgc:158846	ENSDARG00000058462	-6.68273	2.13373e-08
pdzk1ip1	ENSDARG00000017127	-3.53701	0.00030307		sulf1	ENSDARG00000038428	-2.96045	6.21678e-06							cry2	ENSDARG00000102403	-1.33988	0.00131605		gpx8	ENSDARG00000013302	-2.08209	0.0468003		zgc:175248	ENSDARG00000016081	-6.93915	2.13373e-08
slc7a7	ENSDARG00000055226	-4.03986	0.000383389		tmprss2	ENSDARG00000098686	-4.74268	7.84209e-06							psme4a	ENSDARG00000087911	1.77768	0.00131605		ldha	ENSDARG00000101251	1.54098	0.0468003		LOC100538221	100538221	-7.44154	1.17426e-07
sord	ENSDARG00000053405	-3.68566	0.000388006		pdzk1ip1	ENSDARG00000017127	-3.51512	8.3912e-06							acta1a	ENSDARG00000036371	1.14123	0.00131605		LOC100331996	100331996	-3.01291	0.0468003		krt5	ENSDARG00000058371	-7.50842	1.59304e-07
sptbn5	ENSDARG00000097683	-4.08887	0.000388006		rassf7b	ENSDARG00000003193	-3.11133	1.6945e-05							hsp90b1	ENSDARG00000003570	0.984969	0.00145903		zgc:77517	ENSDARG00000028618	-0.991922	0.0468003		slco1d1	ENSDARG00000104108	-6.52177	1.59304e-07
plg	ENSDARG00000023111	-7.20639	0.000388006		shha	ENSDARG00000068567	-4.01922	1.6945e-05							per1b	ENSDARG00000012499	-1.20955	0.00208662							apoc2	ENSDARG00000092155	-6.65402	1.65086e-07
fam49ba	ENSDARG00000020929	-1.88746	0.000394804		lrmp	ENSDARG00000045574	-3.70736	2.18117e-05							cry1bb	ENSDARG00000091131	1.60194	0.00252674							si:ch73-194h10.2	ENSDARG00000044441	-6.47384	4.42773e-07
kcnj15	ENSDARG00000058988	-4.53017	0.000447463		ddr2b	ENSDARG00000058695	-5.4049	4.49836e-05							tnni2a.4	ENSDARG00000029069	-2.01743	0.00252674							col2a1a	ENSDARG00000069093	-6.7066	7.6857e-07
si:dkey-6n6.1	ENSDARG00000062487	-3.51997	0.000524764		inhbaa	ENSDARG00000012671	-4.76468	4.49836e-05							tefa	ENSDARG00000039117	-1.26161	0.00261986							vil1	ENSDARG00000040466	-5.96468	7.93998e-07
slc26a1	ENSDARG00000029832	-4.56412	0.000603085		spint1a	ENSDARG00000102332	-2.36471	5.48576e-05							slc25a33	ENSDARG00000039931	-1.04441	0.00286579							fgfbp2b	ENSDARG00000038056	-6.19265	2.99283e-06
vsg1	ENSDARG00000045003	-2.19023	0.000748743		ptprfa	ENSDARG00000103479	-2.41522	6.9008e-05							mat2ab	ENSDARG00000037121	-1.57745	0.00470729							a1cf	ENSDARG00000002968	-6.23062	3.27489e-06
dab2	ENSDARG00000031761	-2.52601	0.000922781		hoxb5a	ENSDARG00000013057	-3.34029	0.000160579							tdh	ENSDARG00000002745	-1.09839	0.0059205							apoa1b	ENSDARG00000101324	-5.96221	3.97434e-06
bx323839.1	ENSDARG00000095518	-4.01854	0.00105762		rgs4	ENSDARG00000070047	-2.64668	0.000227064							nfil3-5	ENSDARG00000094965	2.30377	0.0059205							si:dkeyp-73b11.8	ENSDARG00000090185	-5.9932	4.50286e-06
osr2	ENSDARG00000038006	-3.22083	0.00175725		kitlga	ENSDARG00000070917	-2.30666	0.000227064							mid1ip1l	ENSDARG00000018145	-1.06865	0.0059205							and1	ENSDARG00000088514	-6.55019	5.32207e-06
phyhd1	ENSDARG00000029905	-2.24867	0.00220183		foxa3	ENSDARG00000012788	-3.57497	0.000341462							si:dkey-33c14.3	ENSDARG00000097118	-1.4541	0.00948044							asxl1	ENSDARG00000036956	-6.0119	5.32207e-06
hoga1	ENSDARG00000018944	-4.97024	0.00231223		btr02	ENSDARG00000052215	-3.55367	0.000349105							bhlhe41	ENSDARG00000041691	-1.47892	0.010235							pcxb	ENSDARG00000051939	-6.13161	5.32207e-06
slc22a7b.2	ENSDARG00000091252	-7.17444	0.00246378		fgf4	ENSDARG00000105230	-3.48584	0.000349105							myhz2	ENSDARG00000012944	-1.83139	0.0116705							si:ch73-106k19.2	ENSDARG00000102568	-5.59943	5.77418e-06
slc22a4	ENSDARG00000005335	-7.61764	0.00246378		rgl3a	ENSDARG00000071213	-3.67572	0.000421507							nr1d1	ENSDARG00000033160	-2.28773	0.0141634							and3	ENSDARG00000056873	-6.55612	7.64339e-06
myo6a	ENSDARG00000044016	-1.11009	0.00322827		sema3b	ENSDARG00000011672	-2.94259	0.000421507							hsf2	ENSDARG00000053097	-1.03153	0.0198264							col9a1a	ENSDARG00000073699	-6.13379	1.01357e-05
mrap	ENSDARG00000091992	-7.01063	0.00332854		vill	ENSDARG00000001909	-4.05032	0.000508068							cdkn1d	ENSDARG00000099719	1.37041	0.0198264							col11a2	ENSDARG00000012422	-5.90413	1.38397e-05
ampd3b	ENSDARG00000032469	0.659941	0.00348238		ackr3b	ENSDARG00000058179	-1.90222	0.000508068							znf395b	ENSDARG00000024195	-1.16111	0.0302474							fabp2	ENSDARG00000006427	-5.38623	1.40324e-05
slc4a1a	ENSDARG00000012881	0.780306	0.00419667		galnt14	ENSDARG00000023448	-3.52046	0.00055639							mat1a	ENSDARG00000039605	-1.44627	0.0322928							cyp2y3	ENSDARG00000068493	-5.78702	3.53507e-05
dao.2	ENSDARG00000035603	-3.63758	0.00419667		zgc:158423	ENSDARG00000055791	-5.1198	0.000559408							tmem38a	ENSDARG00000024047	-0.76871	0.0325473							gene 56	-	-5.24725	4.87267e-05
ndrg1a	ENSDARG00000032849	-2.23952	0.00452201		elf3	ENSDARG00000077982	-3.2149	0.000668775							igf1ra	ENSDARG00000027423	1.59395	0.0325473							col9a2	ENSDARG00000024492	-5.61974	4.87267e-05
lrmp	ENSDARG00000045574	-2.64038	0.00452201		lnx2b	ENSDARG00000071478	-2.03286	0.000796758							actn3b	ENSDARG00000001431	-2.0592	0.0325473							col2a1b	ENSDARG00000011407	-4.77197	4.90242e-05
cu467879.1	ENSDARG00000097939	-7.25034	0.00452201		foxl1	ENSDARG00000008133	-3.56727	0.000811141							si:ch211-132b12.7	ENSDARG00000068374	-2.06089	0.0329692							gstal	ENSDARG00000090228	-4.81875	5.30055e-05
aqp8b	ENSDARG00000089749	-8.07201	0.00452201		foxf2a	ENSDARG00000017195	-3.45904	0.00085605							mylpfa	ENSDARG00000053254	-1.84614	0.0332044							im:7150988	ENSDARG00000109310	-6.09993	0.000127358
si:dkey-103j14.5	ENSDARG00000002219	-7.27769	0.00452201		gata3	ENSDARG00000016526	-1.63367	0.000942207							pdia4	ENSDARG00000018491	0.960437	0.0353053							atp8b5b	ENSDARG00000104450	-5.49119	0.000128617
slc20a1a	ENSDARG00000020114	-4.60104	0.00472635		itgb6	ENSDARG00000002494	-3.43647	0.000967654							nfe2l1a	ENSDARG00000030616	1.34657	0.0353053							matn1	ENSDARG00000030215	-5.7219	0.000130664
slc26a6	ENSDARG00000055835	-4.66406	0.00472635		dhrs3a	ENSDARG00000044982	-3.0784	0.00100478																	krt4	ENSDARG00000017624	-4.24545	0.000139352
adamts13	ENSDARG00000076270	-6.95755	0.00518514		ptprfb	ENSDARG00000005754	-1.28076	0.00109211																	bin2a	ENSDARG00000003219	-5.24103	0.000268107
slc22a7b.3	ENSDARG00000062182	-6.43852	0.00518514		zgc:158263	ENSDARG00000037267	-2.86202	0.00140558																	LOC100331574	100331574	-5.291	0.00034319
gpt2l	ENSDARG00000019541	-2.30397	0.00575012		ptch2	ENSDARG00000055026	-1.76984	0.00178405																	LOC100536295	100536295	-6.06815	0.000423472
slc51a	ENSDARG00000045306	-3.77404	0.00587226		LOC559800	ENSDARG00000077590	-3.45372	0.00185748																	mybpc1	ENSDARG00000045560	6.31137	0.000430193
lmo1	ENSDARG00000034504	-3.04786	0.00683571		si:dkey-110c1.10	ENSDARG00000061810	-7.30484	0.00191805																	col9a3	ENSDARG00000037845	-5.09224	0.000485781
al929222.2	ENSDARG00000097738	-1.44692	0.00715856		tdh	ENSDARG00000002745	-1.12079	0.00191805																	cbx7a	ENSDARG00000038025	5.11349	0.000526122
slc16a13	ENSDARG00000055342	-2.53877	0.00800994		vwa1	ENSDARG00000075468	-3.05934	0.00191805																	lpin1	ENSDARG00000020239	4.62086	0.000609882
steap4	ENSDARG00000055901	-2.76307	0.00825785		zgc:55461	ENSDARG00000041723	-2.28958	0.00191805																	si:dkey-205h13.1	ENSDARG00000079307	6.45956	0.000694375
hmbsb	ENSDARG00000055991	0.761684	0.00843024		sost	ENSDARG00000061259	-2.41704	0.00227275																	cyt1	ENSDARG00000092947	-4.59879	0.000888716
nrip2	ENSDARG00000079985	-2.907	0.00900894		cubn	ENSDARG00000087013	-6.12304	0.00227524																	fbp1b	ENSDARG00000020364	-5.19964	0.000911758
slc23a1	ENSDARG00000015033	-2.62451	0.00965601		tfa	ENSDARG00000016771	-3.08489	0.00242216																	marco	ENSDARG00000059294	6.21882	0.0010398
slc2a11b	ENSDARG00000063288	-5.09859	0.0097026		sdpra	ENSDARG00000027611	-2.66174	0.00242216																	aqp8a.2	ENSDARG00000071592	-5.30908	0.00115232
galnt14	ENSDARG00000023448	-2.84365	0.00979944		sarm1	ENSDARG00000010610	-3.93616	0.00242216																	cldn15a	ENSDARG00000112049	-5.39366	0.00131603
acy3.2	ENSDARG00000005525	-3.54736	0.0112665		degs2	ENSDARG00000042544	-2.92815	0.00242216																	apoa4b.1	ENSDARG00000040298	-5.08169	0.00191881
gata1a	ENSDARG00000013477	0.823913	0.0113724		rbp5	ENSDARG00000101481	-1.773	0.00242216																	hbbe2	ENSDARG00000045143	4.52602	0.00193671
slc22a21	ENSDARG00000094112	-5.33998	0.0113724		sox2	ENSDARG00000070913	-3.80857	0.00242216																	rltgr	ENSDARG00000096533	-5.19656	0.00224417
zmp:0000001267	ENSDARG00000089192	-6.84488	0.0113724		f11r.1	ENSDARG00000017320	-2.31855	0.00242216																	wu:fb59d01	ENSDARG00000089361	-4.94927	0.0023376
slc3a2a	ENSDARG00000036427	-2.62358	0.0113724		arrdc1a	ENSDARG00000068148	-2.76941	0.00242216																	anks4b	ENSDARG00000036846	-5.09856	0.0023376
ahcyl1	ENSDARG00000056331	-2.36214	0.0113724		prrg2	ENSDARG00000087193	-2.75171	0.00242216																	ugt1a7	100384891	-5.1678	0.00235661
si:dkey-93h22.7	ENSDARG00000099600	1.41724	0.0113724		hey2	ENSDARG00000013441	0.693764	0.00242216																	cyp8b1	ENSDARG00000053068	-5.08451	0.00236008
asah2	ENSDARG00000012829	-4.28805	0.0113724		dab2	ENSDARG00000031761	-2.39318	0.00243361																	col1a1a	ENSDARG00000012405	-4.07075	0.00267593
mfsd4b	ENSDARG00000008263	-8.64543	0.0113724		myofl	ENSDARG00000017128	-1.57324	0.00250089																	LOC100001286	100001286	9.2307	0.00299856
cited4a	ENSDARG00000035990	-0.850761	0.011471		dmgdh	ENSDARG00000025703	-2.14131	0.00250089																	s100a10a	ENSDARG00000037425	-4.63855	0.00301204
slc26a6l	ENSDARG00000054127	-5.60098	0.011903		hlx1	ENSDARG00000009134	-2.44814	0.00250089																	adh8b	ENSDARG00000024278	-3.98956	0.00418106
vwa2	ENSDARG00000075441	-2.6009	0.011903		foxf1	ENSDARG00000015399	-2.65417	0.00250127																	epyc	ENSDARG00000056950	-5.34184	0.00511126
si:ch211-139a5.9	ENSDARG00000094561	-5.77601	0.011903		slc20a1a	ENSDARG00000020114	-5.23498	0.00250127																	hapln1a	ENSDARG00000089769	-4.23173	0.00539583
epb41b	ENSDARG00000029019	1.09026	0.011903		zgc:101640	ENSDARG00000022807	-2.65089	0.00257019																	acanb	ENSDARG00000045799	-5.19701	0.0057386
cubn	ENSDARG00000087013	-5.54997	0.011903		plg	ENSDARG00000023111	-5.8341	0.00258836																	rbp2a	ENSDARG00000070038	-5.0082	0.00598299
slc5a2	ENSDARG00000100919	-6.62697	0.011903		erbb3a	ENSDARG00000006202	-2.43227	0.00260467																	lect1	ENSDARG00000100133	-5.04789	0.00646485
slc22a7b.1	ENSDARG00000056643	-4.28641	0.0123291		prss12	ENSDARG00000061830	-3.42421	0.00260467																	col11a1a	ENSDARG00000026165	-4.27496	0.00656801
serpinf2b	ENSDARG00000061383	-8.28601	0.0123477		lsr	ENSDARG00000099291	-2.11038	0.00261871																	matn4	ENSDARG00000015947	-4.02973	0.00656801
f2	ENSDARG00000036041	-5.0167	0.0129228		rab32a	ENSDARG00000029036	-3.49831	0.00261871																	si:dkey-248g15.3	ENSDARG00000097959	-4.90034	0.00656801
zgc:103678	ENSDARG00000037679	-2.47204	0.0134506		ccdc85cb	ENSDARG00000079555	-2.4427	0.00278438																	slc25a38a	ENSDARG00000059805	8.56174	0.00699487
ganc	ENSDARG00000074556	-2.24347	0.0142591		cxcr4a	ENSDARG00000057633	-3.83223	0.00303726																	gstt1a	ENSDARG00000042428	-3.92265	0.00709328
emx1	ENSDARG00000039569	-6.08461	0.0146164			ENSDARG00000099438	-5.4267	0.00306082																	si:ch211-264f5.2	ENSDARG00000078547	9.21668	0.00709328
slc5a12	ENSDARG00000005004	-6.08927	0.0146164		prom2	ENSDARG00000039406	-3.43949	0.00322989																	egfl6	ENSDARG00000045958	-5.06133	0.00719056
zgc:136870	ENSDARG00000054837	-5.81569	0.0177607		zgc:92313	ENSDARG00000040513	-2.52041	0.00335397																	slc9a1	ENSDARG00000067784	9.11212	0.00719056
nit2	ENSDARG00000017590	-1.92185	0.0192386		pabpc4	ENSDARG00000059259	0.85653	0.003422																	si:ch211-93f2.1	ENSDARG00000101726	-3.58595	0.00731871
nr2f1a	ENSDARG00000052695	-1.35307	0.0198537		aqp8b	ENSDARG00000089749	-8.24935	0.003422																	frem2a	ENSDARG00000076856	-5.18805	0.00734574
zgc:92040	ENSDARG00000021154	-7.33395	0.020144		slc26a1	ENSDARG00000029832	-4.20043	0.003422																	vaspa	ENSDARG00000099690	8.45829	0.00758925
cyp11c1	ENSDARG00000042014	-5.643	0.0204103			ENSDARG00000088937	-3.33372	0.003422																	LOC101884954	101884954	3.52388	0.00926091
si:dkey-246g23.4	ENSDARG00000013775	-5.49913	0.0208255		ntrk3b	ENSDARG00000086214	-6.26868	0.00343854																	pdzk1	ENSDARG00000022261	-4.69533	0.00926091
ct025745.1	ENSDARG00000097040	-4.86545	0.0215755		vmhc	ENSDARG00000079564	0.816087	0.00343854																	LOC100334171	100334171	-4.65863	0.0113471
cabz01073736.1	ENSDARG00000099438	-3.38599	0.0215755		tmeff2a	ENSDARG00000051824	-2.72525	0.00357138																	LOC100001321	100001321	-4.83233	0.0117892
foxj1b	ENSDARG00000088290	-4.1048	0.0217584		slc2a11b	ENSDARG00000063288	-5.12588	0.00357138																	anpepb	ENSDARG00000103878	-5.3839	0.0121986
grhprb	ENSDARG00000019986	-5.68355	0.0225042		foxj1b	ENSDARG00000088290	-5.1177	0.00358252																	map3k7cl	ENSDARG00000069143	8.19706	0.0121986
her12	ENSDARG00000032963	-3.43249	0.0230023		fgfbp1b	ENSDARG00000091660	-6.57559	0.00358252																	si:ch211-250g4.3	ENSDARG00000092945	4.41677	0.0125355
si:ch211-132b12.2	ENSDARG00000094946	-7.59472	0.0230959		galnt18b	ENSDARG00000059438	-3.23727	0.00359152																	prss35	ENSDARG00000100691	-4.18723	0.0148502
slc16a12b	ENSDARG00000089885	-2.63015	0.0235347			ENSDARG00000068288	-4.74693	0.0036547																	icn2	ENSDARG00000055514	-4.0726	0.0158094
lgals2a	ENSDARG00000054942	0.527192	0.0235978		tnk2b	ENSDARG00000069433	-1.7775	0.00385422																	abcb11a	ENSDARG00000011573	-4.78358	0.0158094
dnmt3bb.3	ENSDARG00000057863	0.91369	0.0242926			ENSDARG00000039935	-5.92313	0.00385422																	cyp2p9	ENSDARG00000022631	-4.62311	0.0160492
elovl5	ENSDARG00000004979	-3.04976	0.0252306		rnf183	ENSDARG00000068851	-2.42266	0.00389115																	cybb	ENSDARG00000056615	5.01797	0.0160492
fam84a	ENSDARG00000018921	-1.76183	0.0262073		ano1	ENSDARG00000102335	-2.87663	0.00390448																	cdx1b	ENSDARG00000116139	-4.89048	0.0177744
galnt11	ENSDARG00000063636	-1.16428	0.0277828		emx2	ENSDARG00000039701	-3.56762	0.0039989																	wu:fa56d06	ENSDARG00000103342	-4.8383	0.0177744
ftcd	ENSDARG00000007421	-6.29655	0.0302725		zgc:8593	ENSDARG00000098239	-3.42976	0.00420989																	col7a1	ENSDARG00000021720	-4.91075	0.0181351
hnf1bb	ENSDARG00000022295	-4.03508	0.032764		fam49ba	ENSDARG00000020929	-2.05522	0.00454086																	ch1073-291c23.1	ENSDARG00000063631	-4.25568	0.0194589
hao2	ENSDARG00000027992	-3.74906	0.032764		st14a	ENSDARG00000061173	-2.02646	0.00454889																	LOC100536303	100536303	7.47692	0.0206917
tmem174	ENSDARG00000035388	-4.50963	0.033871		grhl2b	ENSDARG00000061974	-4.49569	0.00454889																	sult2st2	ENSDARG00000103785	-4.0675	0.0222485
epha3	ENSDARG00000039373	-1.20949	0.0345909			ENSDARG00000095351	0.657299	0.00476419																	LOC100147904	100147904	-4.44307	0.0223477
chd	ENSDARG00000006110	-3.38047	0.0350451			ENSDARG00000097040	-5.54749	0.00522091																	twf2b	ENSDARG00000009727	4.02856	0.0223477
prlra	ENSDARG00000016570	-2.36597	0.0367366		cdh1	ENSDARG00000102750	-1.50871	0.00522091																	col8a2	ENSDARG00000060893	-4.27821	0.0226557
cav3	ENSDARG00000024141	0.652445	0.0367366		tmem178	ENSDARG00000020758	0.793123	0.00522091																	cdh17	ENSDARG00000005112	-3.85735	0.0231563
slc16a12a	ENSDARG00000017773	1.97032	0.0382788			ENSDARG00000097939	-6.60783	0.00522131																	col11a1b	ENSDARG00000009014	-3.9259	0.023873
agbl5	ENSDARG00000045900	-1.09305	0.0401615		bmp2b	ENSDARG00000041430	-2.10085	0.00522131																	cldni	ENSDARG00000054616	-3.56158	0.023873
trpm1b	ENSDARG00000103476	-5.55084	0.0401615		zgc:194312	ENSDARG00000077414	0.744584	0.0053072																	lgsn	ENSDARG00000007715	7.95748	0.0244592
sult1st3	ENSDARG00000018361	-2.80305	0.0401656			ENSDARG00000099903	-5.53781	0.00532282																	col28a1a	ENSDARG00000077084	-4.96005	0.0244592
gem	ENSDARG00000029112	-3.0458	0.040605		gbgt1l1	ENSDARG00000025275	-6.60329	0.00532282																	aldob	ENSDARG00000053684	-2.56219	0.0244592
lnx2b	ENSDARG00000071478	-1.69462	0.040671		zgc:86598	ENSDARG00000014222	-1.88405	0.00563205																	fras1	ENSDARG00000054619	-3.58721	0.0244592
slc34a1a	ENSDARG00000028824	-6.21659	0.0412505		tjp3	ENSDARG00000002909	-2.14545	0.00591056																	zgc:174931	ENSDARG00000092626	9.10933	0.0246974
dhrs13l1	ENSDARG00000098746	-1.16505	0.0412936			ENSDARG00000105068	-3.274	0.00596216																	gsnb	ENSDARG00000045262	-4.43542	0.0246974
bmp2b	ENSDARG00000041430	-1.80303	0.0413518		mfap2	ENSDARG00000059367	-1.34028	0.00596216																	spon2b	ENSDARG00000002732	-4.32324	0.0253515
si:dkey-110c1.10	ENSDARG00000061810	-5.11446	0.0419588		vsg1	ENSDARG00000045003	-1.9941	0.00596216																	si:ch211-125o16.4	ENSDARG00000056836	-3.86558	0.0266094
eepd1	ENSDARG00000071116	-1.98695	0.0422395		cyp27c1	ENSDARG00000092660	-4.77096	0.00605142																	arrdc2	ENSDARG00000020761	3.32791	0.0284077
amn	ENSDARG00000062947	-4.57223	0.0422395		hip1rb	ENSDARG00000102458	-1.88622	0.00616696																	ogn	ENSDARG00000044132	-4.40713	0.0285216
arg1	ENSDARG00000057429	-6.1545	0.0422395		eef2l2	ENSDARG00000035256	0.890634	0.00618411																	ucmab	ENSDARG00000005485	-4.96944	0.0296778
mfap2	ENSDARG00000059367	-1.18721	0.0422395		c9	ENSDARG00000016319	-7.06541	0.00621989																	mfi2	565942	-4.34842	0.0308942
npr1b	ENSDARG00000018750	-3.50226	0.0422395		glula	ENSDARG00000099776	-1.96551	0.00621989																	opn1sw1	ENSDARG00000045677	-5.48769	0.0308942
amdhd1	ENSDARG00000007366	-3.02408	0.042503		slc22a21	ENSDARG00000094112	-5.90603	0.00653077																	sox10	ENSDARG00000077467	-4.61121	0.033522
fermt3b	ENSDARG00000030938	1.17016	0.0434901		fmnl1b	ENSDARG00000104263	-3.47177	0.00692628																	LOC100331080	100331080	7.498	0.033522
myoc	ENSDARG00000021789	-1.41279	0.0434901		aim1b	ENSDARG00000006060	-1.89385	0.00708329																	si:ch211-246m6.5	ENSDARG00000103750	-4.09632	0.033522
hrsp12	ENSDARG00000035882	-1.61487	0.0434901			ENSDARG00000096939	-1.07318	0.00739218																	si:zfos-911d5.4	ENSDARG00000096738	7.70032	0.0335965
ddit4	ENSDARG00000037618	-2.26688	0.0434901		slc5a12	ENSDARG00000005004	-9.544	0.00773364																	alcamb	ENSDARG00000058538	-3.33868	0.0341481
c9	ENSDARG00000016319	-5.83075	0.0434901		armc4	ENSDARG00000055128	-7.21181	0.00797884																	satb2	ENSDARG00000061885	-4.30568	0.0341481
epor	ENSDARG00000090834	1.19825	0.0434901		ildr1b	ENSDARG00000040910	-2.55055	0.00797884																	dusp27	ENSDARG00000099889	3.47434	0.0352963
zgc:136493	ENSDARG00000029259	-2.83595	0.0434901		kcnj15	ENSDARG00000058988	-4.31817	0.00797884																	LOC101886535	101886535	6.62241	0.0407807
otx2	ENSDARG00000011235	-5.22849	0.0434901		si:dkeyp-13a3.10	ENSDARG00000092225	-1.96645	0.00797884																	anxa1c	ENSDARG00000104359	-3.29944	0.0407807
slc24a2	ENSDARG00000042988	-2.58032	0.0434901		s100v2	ENSDARG00000070702	-1.06111	0.00797884																	col1a1b	ENSDARG00000035809	-2.73518	0.0435245
cxcl12b	ENSDARG00000055100	-2.21941	0.0439608		si:dkey-157l19.2	ENSDARG00000060340	-2.27964	0.00797884																	mtp	406207	-4.33386	0.0437646
lix1	ENSDARG00000052154	-2.59133	0.0439608		emx1	ENSDARG00000039569	-6.60032	0.00797884																	ezra	ENSDARG00000020944	-3.6759	0.0442475
gyltl1b	ENSDARG00000017058	-1.85437	0.044838		padi2	ENSDARG00000044167	-2.52631	0.00845418																	nol10	ENSDARG00000020077	3.02793	0.0461303
fzd8b	ENSDARG00000038569	-5.51751	0.0453046		sult6b1	ENSDARG00000086826	-1.23898	0.00875732																	pcdh18a	ENSDARG00000089805	-4.16014	0.0461303
capn1a	ENSDARG00000052702	0.61642	0.0453046		wu:fj16a03	ENSDARG00000100952	-3.12534	0.00887162																	tgfbi	ENSDARG00000071586	-3.28568	0.0472059
nmt1b	ENSDARG00000057206	0.655381	0.0456864		cldn11a	ENSDARG00000020031	-4.72725	0.00887162																	si:ch211-137i24.10	ENSDARG00000057706	-4.19483	0.0484892
pter	ENSDARG00000063375	-1.83736	0.0458259		f2	ENSDARG00000036041	-4.20427	0.00917016
-	ENSDARG00000099435	0.710855	0.0473072		her12	ENSDARG00000032963	-4.27628	0.00942477
fmo5	ENSDARG00000016357	-1.46228	0.0475057		tcf7l2	ENSDARG00000004415	-1.2062	0.00973704
dbh	ENSDARG00000069446	-8.29844	0.0475057		zgc:174164	ENSDARG00000057138	-3.35654	0.00973704
pvalb9	ENSDARG00000071601	-8.00682	0.0475057		ampd3b	ENSDARG00000032469	0.738148	0.00982752
					id1	ENSDARG00000040764	-0.997	0.00984116
					bhmt	ENSDARG00000013430	-2.035	0.00988477
					ap1s3b	ENSDARG00000027966	-2.164	0.00988477
					acadvl	ENSDARG00000016687	0.593625	0.00988477
					adam19a	ENSDARG00000059693	-1.76374	0.0100692
					islr2	ENSDARG00000051875	-3.10406	0.0100692
					evi5a	ENSDARG00000077666	-5.6773	0.0100692
					slc6a14	ENSDARG00000029866	-4.94032	0.0102601
					bmpr1ba	ENSDARG00000104100	-2.74065	0.0104758
					cxcl12a	ENSDARG00000037116	-3.47857	0.0106083
					pvalb7	ENSDARG00000034705	-4.2317	0.0106445
					zgc:152986	ENSDARG00000079957	-6.42604	0.0110394
					eno4	ENSDARG00000070598	-6.24884	0.0111852
					si:ch211-214c7.4	ENSDARG00000069595	-1.56093	0.0112733
					slc26a6l	ENSDARG00000054127	-6.48762	0.0112733
					nipal4	ENSDARG00000059365	-3.77093	0.0113508
					gulp1a	ENSDARG00000001733	-1.85864	0.0113508
					zmp:0000001267	ENSDARG00000089192	-6.19903	0.0122367
					hhip	ENSDARG00000060397	-1.79484	0.0126773
					kcnj16	ENSDARG00000045039	-7.19099	0.012822
					srpx	ENSDARG00000010318	-1.19488	0.0128448
					elovl1a	ENSDARG00000099960	-1.7921	0.0128448
					hoxb8a	ENSDARG00000056027	-3.43298	0.0128448
					si:dkey-126g1.7	ENSDARG00000086703	-3.22695	0.0128897
					sigirr	ENSDARG00000062204	-3.80806	0.0128897
					wnt7bb	ENSDARG00000071107	-4.35968	0.0138893
					ckmb	ENSDARG00000040565	0.690786	0.0139354
						ENSDARG00000052277	-3.95038	0.0140342
					cry1bb	ENSDARG00000091131	1.61317	0.0145222
					usp28	ENSDARG00000008880	0.628031	0.0145222
					cxcl20	ENSDARG00000075163	-3.06546	0.0150399
					pik3r6	ENSDARG00000100336	-4.4342	0.0150827
					nrip2	ENSDARG00000079985	-2.66127	0.0161244
						ENSDARG00000091992	-4.96536	0.0169356
					itm2bb	ENSDARG00000041505	-1.56783	0.0169356
						ENSDARG00000035388	-5.30978	0.0170682
					gls2b	ENSDARG00000002917	0.704032	0.0170682
					ahcyl1	ENSDARG00000056331	-2.21048	0.017526
					cyp2k18	ENSDARG00000104593	-5.47191	0.0176733
					ugp2b	ENSDARG00000008200	-0.722599	0.0176733
					pbx3b	ENSDARG00000013615	-2.16457	0.0176733
					pkp3a	ENSDARG00000051861	-1.94006	0.0176733
					glis3	ENSDARG00000069726	-5.87626	0.0176733
					smoc2	ENSDARG00000088157	-3.44198	0.0177607
					prkchb	ENSDARG00000043243	-4.31649	0.0178655
					epha3	ENSDARG00000039373	-1.66512	0.0183455
					zgc:195356	ENSDARG00000099134	-6.03829	0.0183455
					tgfbi	ENSDARG00000071586	-2.08227	0.0186638
					osbpl3a	ENSDARG00000033251	-1.8008	0.0186638
					mpzl2b	ENSDARG00000027345	-1.54265	0.0187311
					bx323839.1	ENSDARG00000095518	-2.82511	0.0190382
					s100v1	ENSDARG00000070427	-2.49248	0.0190382
					ndrg4	ENSDARG00000103937	0.852955	0.0193752
					plxna4	ENSDARG00000019328	-2.02661	0.0193752
					ptx3a	ENSDARG00000068275	-2.42822	0.0195114
					zgc:153704	ENSDARG00000045979	-3.22284	0.0196076
					fhl1a	ENSDARG00000071498	0.507151	0.0199857
					anxa3b	ENSDARG00000044254	-1.66933	0.0204647
						ENSDARG00000103044	-2.97759	0.0213755
					hsd3b1	ENSDARG00000069926	-5.28171	0.0216154
					slc34a1a	ENSDARG00000028824	-8.2324	0.0217927
					hoxa3a	ENSDARG00000103862	-2.73778	0.0219966
					sema3d	ENSDARG00000017369	-1.86412	0.0221134
					star	ENSDARG00000006137	-9.44803	0.0228432
					stmn2b	ENSDARG00000070537	-2.83492	0.0228986
					arl4cb	ENSDARG00000032708	-1.85113	0.0229321
					pla1a	ENSDARG00000102176	0.886309	0.0229321
					zgc:113276	ENSDARG00000056650	1.29322	0.0229321
					vamp8	ENSDARG00000024116	-1.26283	0.0230965
					atic	ENSDARG00000016706	-1.66752	0.0230965
						ENSDARG00000099435	0.90781	0.0230965
					osr2	ENSDARG00000038006	-2.36251	0.0230965
					gdpd3a	ENSDARG00000074466	-2.85674	0.0230965
					hoxb4a	ENSDARG00000013533	-3.14399	0.0230965
					zgc:110340	ENSDARG00000079497	-2.00864	0.0230965
					lamb2l	ENSDARG00000033950	-3.55111	0.0232211
						ENSDARG00000093899	-1.51073	0.0236362
					alox12	ENSDARG00000069463	-2.32393	0.0237652
					arhgap42a	ENSDARG00000056619	-1.05669	0.0237652
					sox11a	ENSDARG00000077811	-1.13672	0.0237652
					nr2f5	ENSDARG00000033172	-2.43169	0.0237652
						ENSDARG00000097637	-3.53685	0.0238014
					hdac7b	ENSDARG00000073850	0.868877	0.0238014
					ntd5	ENSDARG00000040944	-1.60327	0.0238014
					fndc4b	ENSDARG00000009949	-5.26444	0.0238014
					gadd45ab	ENSDARG00000104571	-0.801174	0.0238638
					slc2a12	ENSDARG00000036865	-2.2239	0.0238638
					sox19a	ENSDARG00000010770	-3.4191	0.0241481
					klhl34	ENSDARG00000057582	1.03447	0.0241481
					sord	ENSDARG00000053405	-2.58147	0.0245423
					si:ch211-105j21.9	ENSDARG00000097845	-1.88755	0.0245423
					sorl1	ENSDARG00000013892	-0.959116	0.0245423
					tekt2	ENSDARG00000028973	-6.78186	0.0245423
					capsla	ENSDARG00000103521	-5.05525	0.0245423
					slc16a13	ENSDARG00000055342	-2.24153	0.0245423
						ENSDARG00000046124	-2.27084	0.025792
					si:dkey-14d8.20	ENSDARG00000045837	-3.53253	0.0261827
						ENSDARG00000021896	-1.33604	0.0261827
					galnt6	ENSDARG00000014386	-1.67242	0.0273736
					irx2a	ENSDARG00000001785	0.781548	0.0273736
					axdnd1	ENSDARG00000062355	-5.61156	0.0273736
					dbh	ENSDARG00000069446	-7.55379	0.0273736
						ENSDARG00000075676	-6.27541	0.0273736
					asap2b	ENSDARG00000019564	-1.45362	0.0273939
					uap1l1	ENSDARG00000013082	-1.17236	0.0275454
					si:ch211-132b12.2	ENSDARG00000094946	-8.50838	0.0276582
					maats1	ENSDARG00000006292	-5.25235	0.0277359
					fam84a	ENSDARG00000018921	-1.72712	0.0277359
					hook1	ENSDARG00000042946	-2.15595	0.0277359
					si:ch211-213d14.2	ENSDARG00000097483	-3.67577	0.0278814
					zgc:175176	ENSDARG00000058775	-2.8111	0.0278917
					slc23a1	ENSDARG00000015033	-2.31396	0.0281756
					foxd1	ENSDARG00000029179	-3.95004	0.0281756
					serpine2	ENSDARG00000029353	-1.21339	0.0281756
					grtp1b	ENSDARG00000030269	-6.46443	0.0281756
					grem2b	ENSDARG00000103092	-5.21859	0.0281756
					si:dkey-17e16.17	ENSDARG00000091669	-3.48356	0.0281756
					eepd1	ENSDARG00000071116	-2.42165	0.0281756
					ldb3b	ENSDARG00000099974	0.811003	0.0281756
					myo5b	ENSDARG00000062003	-1.84554	0.0286867
					gstp1	ENSDARG00000104068	-1.58917	0.0286867
					rerglb	ENSDARG00000054324	-4.07966	0.0289713
					ssuh2rs1s	ENSDARG00000063292	-0.694725	0.0289713
					fgf10a	ENSDARG00000030932	-3.39221	0.0291917
					si:ch211-163l21.10	ENSDARG00000068855	-6.59128	0.0293233
					gpt2l	ENSDARG00000019541	-1.85622	0.0296708
					si:dkey-87o1.2	ENSDARG00000095796	-2.89301	0.0298415
					kcnma1a	ENSDARG00000079840	-3.03802	0.0298691
					bckdk	ENSDARG00000016904	0.574472	0.0300466
					crabp1b	ENSDARG00000035904	-4.21499	0.0302793
					brinp3a.1	ENSDARG00000076351	-3.64378	0.0302793
					sh3d21	ENSDARG00000099448	-1.41464	0.0302793
					paqr5b	ENSDARG00000052688	-3.61288	0.0311846
					hhla2b.2	ENSDARG00000086254	-2.11498	0.0313632
					LOC103911624	ENSDARG00000100069	-6.56137	0.0316525
					txn	ENSDARG00000044125	-2.18713	0.0316525
					si:ch211-153b23.5	ENSDARG00000058206	-3.42862	0.0321845
					gcdha	ENSDARG00000037057	0.661168	0.0321845
					hoxb6a	ENSDARG00000010630	-4.17277	0.0326157
					ctsla	ENSDARG00000007836	-1.29211	0.0333742
					lmo1	ENSDARG00000034504	-2.77295	0.0333742
					LOC100331381	ENSDARG00000078151	-4.76088	0.0333742
					tnnt2a	ENSDARG00000020610	0.61842	0.0335353
						ENSDARG00000086945	0.771601	0.0344438
					foxa1	ENSDARG00000102138	-4.28502	0.0344438
					col4a5	ENSDARG00000052063	-2.553	0.0346576
					lgals9l5	ENSDARG00000087311	-6.30423	0.0349817
						ENSDARG00000102055	0.50275	0.0349817
					phyhd1	ENSDARG00000029905	-1.67799	0.0349817
					ptgr1	ENSDARG00000024877	-1.81308	0.0349817
					slc51a	ENSDARG00000045306	-2.355	0.0349817
					spint2	ENSDARG00000069476	-1.99259	0.0349817
					si:dkey-33i11.3	ENSDARG00000027609	-2.53587	0.0349817
					mybpc3	ENSDARG00000011615	0.620409	0.0349817
					ftcd	ENSDARG00000007421	-5.75001	0.0349817
					traf4b	ENSDARG00000038964	-3.38579	0.0349817
					sema7a	ENSDARG00000078707	-2.79132	0.0349817
					rbm47	ENSDARG00000061985	-1.82683	0.0349817
					ciarta	ENSDARG00000058094	-1.44386	0.0349817
					fkbp11	ENSDARG00000037000	-1.34889	0.0349817
					fzd8b	ENSDARG00000038569	-4.45853	0.0350292
					cx43	ENSDARG00000041799	-3.24682	0.0350292
						ENSDARG00000078636	0.847968	0.0351732
					ccl25b	ENSDARG00000070873	-5.46904	0.0351732
					si:ch211-122f10.4	ENSDARG00000052074	-1.47879	0.0351732
					myl7	ENSDARG00000019096	0.694976	0.0351732
					lix1	ENSDARG00000052154	-3.2655	0.0351732
					si:ch1073-349o24.2	ENSDARG00000006863	-3.97365	0.0352848
					ripk4	ENSDARG00000043211	-2.7212	0.0353783
					uacab	ENSDARG00000060238	-1.97813	0.0354727
					krt17	ENSDARG00000094041	-2.50905	0.0354727
					efna2a	ENSDARG00000031372	-2.25845	0.0355146
					actc1a	ENSDARG00000042535	0.409565	0.035582
					spa17	ENSDARG00000069361	-5.19312	0.035582
					rgcc	ENSDARG00000035810	-1.56531	0.0356349
					slc5a2	ENSDARG00000100919	-8.50836	0.0356364
					rdh10a	ENSDARG00000058730	-1.55259	0.0360133
					avpr2aa	ENSDARG00000007436	-3.56179	0.0360133
					alcamb	ENSDARG00000058538	-1.32642	0.0360133
					ghrb	ENSDARG00000007671	0.730084	0.0360141
					spock3	ENSDARG00000070266	-1.36187	0.0363079
					slit1b	ENSDARG00000099446	-4.48277	0.036587
					zgc:136493	ENSDARG00000029259	-2.74541	0.0365877
					znf385c	ENSDARG00000058154	-3.4217	0.0365877
					glra4a	ENSDARG00000006865	-6.19797	0.036719
					wu:fb77a09	ENSDARG00000075707	-1.20591	0.036719
					npnt	ENSDARG00000018721	-1.37227	0.036719
					fat2	ENSDARG00000018923	-1.83371	0.036719
					six9	ENSDARG00000068407	-6.65242	0.0372679
						ENSDARG00000043746	-2.29411	0.0372679
					si:dkey-30c15.2	ENSDARG00000069540	-4.29302	0.0373292
					lamc3	ENSDARG00000093572	-2.05298	0.0376238
					hoxb3az	ENSDARG00000029263	-1.48775	0.0387251
					cited4a	ENSDARG00000035990	-0.791689	0.039367
					edil3a	ENSDARG00000093413	-2.40445	0.039367
					nhsl1a	ENSDARG00000054537	0.793448	0.0394596
					asic2	ENSDARG00000006849	-4.45799	0.0395455
					lrrc10	ENSDARG00000045612	0.705303	0.0395542
					myo6a	ENSDARG00000044016	-0.829446	0.039889
						ENSDARG00000104999	1.13148	0.0400214
					fam212aa	ENSDARG00000070360	-1.7411	0.0404658
					anln	ENSDARG00000060917	1.12338	0.0406576
					cmlc1	ENSDARG00000032976	0.580183	0.0406576
					si:ch211-202f5.3	ENSDARG00000092998	-2.51148	0.0406576
					si:ch211-95j8.5	ENSDARG00000103703	-4.97253	0.0406673
					zgc:158403	ENSDARG00000062757	-2.22748	0.0412833
					gli1	ENSDARG00000101244	-1.59797	0.0419445
					cnksr1	ENSDARG00000032932	-2.50645	0.0431212
					tmem30c	ENSDARG00000009430	-2.45552	0.0436544
					cldn7b	ENSDARG00000014047	-2.91394	0.0439527
					pdlim2	ENSDARG00000069956	-1.44267	0.0439527
					psme4a	ENSDARG00000087911	0.895261	0.0442181
					top2a	ENSDARG00000024488	0.808928	0.0442181
						ENSDARG00000099425	-4.17881	0.0444684
					si:ch211-260e23.9	ENSDARG00000102572	0.743987	0.0445148
					arhgap12a	ENSDARG00000008548	-1.48086	0.0445148
					barx1	ENSDARG00000007407	-4.36107	0.0452872
					sh2d5	ENSDARG00000014324	-2.33448	0.0453854
						ENSDARG00000089963	1.4289	0.0455557
					si:dkey-16l2.17	ENSDARG00000027196	-4.62157	0.0458145
					rassf7a	ENSDARG00000079917	-1.10036	0.0458145
					si:ch211-251b21.1	ENSDARG00000007275	-1.38529	0.0458145
					si:dkey-39a18.1	ENSDARG00000045669	-6.3631	0.0459218
					si:ch73-222h13.1	ENSDARG00000087107	-5.78345	0.0464885
					frem2b	ENSDARG00000102626	-1.45356	0.0464885
					fmn2b	ENSDARG00000061778	-3.85529	0.0465222
					drc3	ENSDARG00000041300	-3.63246	0.0468331
					ckma	ENSDARG00000035327	0.529987	0.0468384
					pitx1	ENSDARG00000042785	-3.16011	0.0469915
					cygb1	ENSDARG00000099371	-3.99432	0.0469915
						ENSDARG00000103720	-0.799565	0.0469915
					capn1a	ENSDARG00000052702	0.656847	0.0469915
	0.696				col6a1	ENSDARG00000074908	-1.17943	0.0470644
						ENSDARG00000094974	-4.44636	0.0484022
	0.96				il17rd	ENSDARG00000098359	-1.91905	0.0484064
					myoc	ENSDARG00000021789	-1.739	0.0488575
					wnt2	ENSDARG00000041117	-4.46811	0.0489784
					popdc2	ENSDARG00000069922	0.738484	0.0494066
					dennd3a	ENSDARG00000078797	-1.32991	0.0499102
					clic4	ENSDARG00000022995	0.474728	0.0499563

## Sheet:  SI Table 9a
Supporting Information Table S9a: Differentially expressed gene groups for BPA exposure
Day 5 100 ug/L BPA
Compilation of gene annotations from DAVID's Functional Annotation Table (for all differentially expressed genes)
Enriched genes and GOs according to DAVID's Gene Functional Classification
Enriched KEGG pathways (for zebrafish: dre) according to DAVID's Gene Functional Classification
NB Enrichment score = -log Geometric mean of P-vlaues and a value of >1.3 is equivalent to a non log Geometric mean of P-vlaue of <0.05
Gene Group 1	Enrichment Score: 4.151413570229797
ENSEMBL_GENE_ID	Gene Name	Species	COG_ONTOLOGY	GOTERM_BP_DIRECT	GOTERM_CC_DIRECT	GOTERM_MF_DIRECT	INTERPRO	KEGG_PATHWAY
ENSDARG00000055901	STEAP family member 4(steap4)	Danio rerio		GO:0015677~copper ion import,GO:0097461~ferric iron import into cell,	GO:0005768~endosome,GO:0005887~integral component of plasma membrane,GO:0016020~membrane,GO:0016021~integral component of membrane,	GO:0008823~cupric reductase activity,GO:0052851~ferric-chelate reductase (NADPH) activity,	IPR013130:Ferric reductase transmembrane component-like domain,IPR016040:NAD(P)-binding domain,
ENSDARG00000059166	zgc:153639(zgc:153639)	Danio rerio		GO:0055085~transmembrane transport,	GO:0005887~integral component of plasma membrane,GO:0016020~membrane,GO:0016021~integral component of membrane,	GO:0022857~transmembrane transporter activity,GO:0022891~substrate-specific transmembrane transporter activity,	IPR005828:General substrate transporter,IPR020846:Major facilitator superfamily domain,
ENSDARG00000054127	solute carrier family 26, member 6, like(slc26a6l)	Danio rerio		GO:0006810~transport,GO:0006821~chloride transport,GO:0008272~sulfate transport,GO:0042391~regulation of membrane potential,GO:0051453~regulation of intracellular pH,GO:0055085~transmembrane transport,GO:1902476~chloride transmembrane transport,	GO:0005887~integral component of plasma membrane,GO:0016020~membrane,GO:0016021~integral component of membrane,	GO:0005254~chloride channel activity,GO:0008271~secondary active sulfate transmembrane transporter activity,GO:0008510~sodium:bicarbonate symporter activity,GO:0015116~sulfate transmembrane transporter activity,GO:0015301~anion:anion antiporter activity,GO:0019531~oxalate transmembrane transporter activity,	IPR001902:Sulphate anion transporter,IPR002645:STAS domain,IPR011547:Sulphate transporter,IPR018045:Sulphate anion transporter, conserved site,
ENSDARG00000091252	solute carrier family 22 (organic anion transporter), member 7b, tandem duplicate 2(slc22a7b.2)	Danio rerio		GO:0055085~transmembrane transport,	GO:0005887~integral component of plasma membrane,GO:0016020~membrane,GO:0016021~integral component of membrane,	GO:0008514~organic anion transmembrane transporter activity,GO:0022857~transmembrane transporter activity,	IPR005828:General substrate transporter,IPR020846:Major facilitator superfamily domain,
ENSDARG00000045003	vessel-specific 1(vsg1)	Danio rerio		GO:0007219~Notch signaling pathway,	GO:0016020~membrane,GO:0016021~integral component of membrane,		IPR009538:PV-1,
ENSDARG00000099600	si:dkey-93h22.7(si:dkey-93h22.7)	Danio rerio			GO:0016020~membrane,GO:0016021~integral component of membrane,		IPR003598:Immunoglobulin subtype 2,IPR003599:Immunoglobulin subtype,IPR007110:Immunoglobulin-like domain,IPR013783:Immunoglobulin-like fold,
ENSDARG00000015033	solute carrier family 23 (ascorbic acid transporter), member 1(slc23a1)	Danio rerio		GO:0006810~transport,GO:0015882~L-ascorbic acid transport,GO:0055085~transmembrane transport,	GO:0016020~membrane,GO:0016021~integral component of membrane,	GO:0005215~transporter activity,GO:0070890~sodium-dependent L-ascorbate transmembrane transporter activity,	IPR006043:Xanthine/uracil/vitamin C permease,
ENSDARG00000094946	si:ch211-132b12.2(si:ch211-132b12.2)	Danio rerio	General function prediction only,	GO:0006810~transport,GO:0006836~neurotransmitter transport,GO:0007268~chemical synaptic transmission,GO:0015812~gamma-aminobutyric acid transport,	GO:0005887~integral component of plasma membrane,GO:0016020~membrane,GO:0016021~integral component of membrane,GO:0043005~neuron projection,	GO:0005328~neurotransmitter:sodium symporter activity,GO:0005332~gamma-aminobutyric acid:sodium symporter activity,GO:0015293~symporter activity,	IPR000175:Sodium:neurotransmitter symporter,
ENSDARG00000045306	solute carrier family 51, alpha subunit(slc51a)	Danio rerio		GO:0006810~transport,GO:0015721~bile acid and bile salt transport,	GO:0005783~endoplasmic reticulum,GO:0005789~endoplasmic reticulum membrane,GO:0005886~plasma membrane,GO:0016020~membrane,GO:0016021~integral component of membrane,GO:0043234~protein complex,	GO:0005215~transporter activity,GO:0042803~protein homodimerization activity,GO:0046982~protein heterodimerization activity,	IPR005178:Organic solute transporter Ost-alpha,
ENSDARG00000013775	si:dkey-246g23.4(si:dkey-246g23.4)	Danio rerio		GO:0035879~plasma membrane lactate transport,GO:0055085~transmembrane transport,	GO:0005887~integral component of plasma membrane,GO:0016020~membrane,GO:0016021~integral component of membrane,	GO:0015129~lactate transmembrane transporter activity,	IPR011701:Major facilitator superfamily,IPR020846:Major facilitator superfamily domain,
ENSDARG00000012881	solute carrier family 4 (anion exchanger), member 1a (Diego blood group)(slc4a1a)	Danio rerio		GO:0006810~transport,GO:0006811~ion transport,GO:0006820~anion transport,GO:0030218~erythrocyte differentiation,GO:0035162~embryonic hemopoiesis,GO:0051453~regulation of intracellular pH,GO:1902476~chloride transmembrane transport,	GO:0005887~integral component of plasma membrane,GO:0016020~membrane,GO:0016021~integral component of membrane,	GO:0005215~transporter activity,GO:0005452~inorganic anion exchanger activity,GO:0005515~protein binding,GO:0008509~anion transmembrane transporter activity,	IPR001717:Anion exchange protein,IPR003020:Bicarbonate transporter, eukaryotic,IPR011531:Bicarbonate transporter, C-terminal,IPR013769:Band 3 cytoplasmic domain,IPR016152:Phosphotransferase/anion transporter,IPR018241:Anion exchange, conserved site,
ENSDARG00000055342	solute carrier family 16, member 13 (monocarboxylic acid transporter 13)(slc16a13)	Danio rerio		GO:0035879~plasma membrane lactate transport,	GO:0005887~integral component of plasma membrane,	GO:0015129~lactate transmembrane transporter activity,	IPR011701:Major facilitator superfamily,IPR020846:Major facilitator superfamily domain,
ENSDARG00000020114	solute carrier family 20, member 1a(slc20a1a)	Danio rerio		GO:0006810~transport,GO:0006817~phosphate ion transport,	GO:0005887~integral component of plasma membrane,GO:0016020~membrane,GO:0016021~integral component of membrane,	GO:0005315~inorganic phosphate transmembrane transporter activity,GO:0015293~symporter activity,GO:0015319~sodium:inorganic phosphate symporter activity,	IPR001204:Phosphate transporter,
ENSDARG00000005335	solute carrier family 22 (organic cation/zwitterion transporter), member 4(slc22a4)	Danio rerio		GO:0001887~selenium compound metabolic process,GO:0009437~carnitine metabolic process,GO:0015695~organic cation transport,GO:0015698~inorganic anion transport,GO:0050787~detoxification of mercury ion,GO:0051597~response to methylmercury,GO:0055085~transmembrane transport,GO:0072337~modified amino acid transport,GO:1902603~carnitine transmembrane transport,	GO:0005887~integral component of plasma membrane,GO:0016020~membrane,GO:0016021~integral component of membrane,	GO:0005215~transporter activity,GO:0015226~carnitine transmembrane transporter activity,GO:0015491~cation:cation antiporter activity,GO:0022857~transmembrane transporter activity,	IPR005828:General substrate transporter,IPR005829:Sugar transporter, conserved site,IPR020846:Major facilitator superfamily domain,
ENSDARG00000042988	solute carrier family 24 (sodium/potassium/calcium exchanger), member 2(slc24a2)	Danio rerio		GO:0006874~cellular calcium ion homeostasis,GO:0055085~transmembrane transport,GO:0060291~long-term synaptic potentiation,GO:0060292~long term synaptic depression,	GO:0005887~integral component of plasma membrane,GO:0016020~membrane,GO:0016021~integral component of membrane,	GO:0005262~calcium channel activity,GO:0005509~calcium ion binding,GO:0008273~calcium, potassium:sodium antiporter activity,GO:0030955~potassium ion binding,GO:0031402~sodium ion binding,	IPR004481:Sodium/potassium/calcium exchanger,IPR004837:Sodium/calcium exchanger membrane region,
ENSDARG00000103476	transient receptor potential cation channel, subfamily M, member 1b(trpm1b)	Danio rerio	Intracellular trafficking and secretion,	GO:0006811~ion transport,GO:0007216~G-protein coupled glutamate receptor signaling pathway,GO:0034220~ion transmembrane transport,GO:0051262~protein tetramerization,GO:0055085~transmembrane transport,GO:0071482~cellular response to light stimulus,	GO:0016020~membrane,GO:0016021~integral component of membrane,	GO:0005216~ion channel activity,GO:0005261~cation channel activity,	IPR005821:Ion transport domain,
ENSDARG00000090834	erythropoietin receptor(epor)	Danio rerio		GO:0030097~hemopoiesis,	GO:0016020~membrane,GO:0016021~integral component of membrane,	GO:0004888~transmembrane signaling receptor activity,	IPR003961:Fibronectin, type III,IPR009167:Erythropoietin receptor,IPR013783:Immunoglobulin-like fold,IPR015152:Growth hormone/erythropoietin receptor, ligand binding,	dre04630:Jak-STAT signaling pathway, dre04060:Cytokine-cytokine receptor interaction,dre04630:Jak-STAT signaling pathway,
ENSDARG00000005004	solute carrier family 5 (sodium/monocarboxylate cotransporter), member 12(slc5a12)	Danio rerio		GO:0006810~transport,GO:0006811~ion transport,GO:0006814~sodium ion transport,GO:0055085~transmembrane transport,	GO:0005887~integral component of plasma membrane,GO:0016020~membrane,GO:0016021~integral component of membrane,	GO:0005215~transporter activity,GO:0015129~lactate transmembrane transporter activity,GO:0015293~symporter activity,GO:0015355~secondary active monocarboxylate transmembrane transporter activity,	IPR001734:Sodium/solute symporter,
ENSDARG00000089749	aquaporin 8b(aqp8b)	Danio rerio		GO:0006810~transport,GO:0009992~cellular water homeostasis,GO:0034220~ion transmembrane transport,	GO:0005887~integral component of plasma membrane,GO:0016020~membrane,GO:0016021~integral component of membrane,	GO:0005215~transporter activity,GO:0005372~water transmembrane transporter activity,GO:0015250~water channel activity,GO:0015254~glycerol channel activity,	IPR000425:Major intrinsic protein,IPR022357:Major intrinsic protein, conserved site,IPR023271:Aquaporin-like,IPR023277:Aquaporin 8,
ENSDARG00000094561	si:ch211-139a5.9(si:ch211-139a5.9)	Danio rerio		GO:0006811~ion transport,	GO:0016020~membrane,GO:0016021~integral component of membrane,	GO:0005216~ion channel activity,	IPR000272:Ion-transport regulator, FXYD motif,	dre04260:Cardiac muscle contraction,dre04261:Adrenergic signaling in cardiomyocytes,
ENSDARG00000055835	solute carrier family 26, member 6(slc26a6)	Danio rerio		GO:0006810~transport,GO:0006820~anion transport,GO:0008272~sulfate transport,GO:0009651~response to salt stress,GO:0042391~regulation of membrane potential,GO:0051453~regulation of intracellular pH,GO:0051454~intracellular pH elevation,GO:0055081~anion homeostasis,GO:0055085~transmembrane transport,GO:1902476~chloride transmembrane transport,	GO:0005887~integral component of plasma membrane,GO:0016020~membrane,GO:0016021~integral component of membrane,	GO:0005254~chloride channel activity,GO:0008271~secondary active sulfate transmembrane transporter activity,GO:0008509~anion transmembrane transporter activity,GO:0015106~bicarbonate transmembrane transporter activity,GO:0015116~sulfate transmembrane transporter activity,GO:0015301~anion:anion antiporter activity,GO:0019531~oxalate transmembrane transporter activity,	IPR001902:Sulphate anion transporter,IPR002645:STAS domain,IPR011547:Sulphate transporter,IPR018045:Sulphate anion transporter, conserved site,
ENSDARG00000089192	zmp:0000001267(zmp:0000001267)	Danio rerio			GO:0005887~integral component of plasma membrane,	GO:0015179~L-amino acid transmembrane transporter activity,GO:0015297~antiporter activity,	IPR002293:Amino acid/polyamine transporter I,		PIRSF006060:amino acid transporter,
ENSDARG00000036427	solute carrier family 3 (amino acid transporter heavy chain), member 2a(slc3a2a)	Danio rerio		GO:0005975~carbohydrate metabolic process,GO:0060142~regulation of syncytium formation by plasma membrane fusion,	GO:0016020~membrane,GO:0016021~integral component of membrane,	GO:0003824~catalytic activity,	IPR006047:Glycosyl hydrolase, family 13, catalytic domain,IPR013781:Glycoside hydrolase, catalytic domain,IPR015902:Glycoside hydrolase, family 13,IPR017853:Glycoside hydrolase, superfamily,			SM00642:Aamy,
ENSDARG00000028824	solute carrier family 34 (type II sodium/phosphate cotransporter), member 1a(slc34a1a)	Danio rerio		GO:0030643~cellular phosphate ion homeostasis,GO:0044341~sodium-dependent phosphate transport,	GO:0005737~cytoplasm,GO:0005886~plasma membrane,GO:0005903~brush border,GO:0016020~membrane,GO:0016021~integral component of membrane,GO:0016324~apical plasma membrane,GO:0031982~vesicle,	GO:0005315~inorganic phosphate transmembrane transporter activity,GO:0005436~sodium:phosphate symporter activity,GO:0015321~sodium-dependent phosphate transmembrane transporter activity,	IPR003841:Sodium-dependent phosphate transport protein,
ENSDARG00000017127	PDZK1 interacting protein 1(pdzk1ip1)	Danio rerio		GO:0030097~hemopoiesis,	GO:0016020~membrane,GO:0016021~integral component of membrane,		IPR026628:PDZK1-interacting protein 1 family,
ENSDARG00000089885	solute carrier family 16, member 12b(slc16a12b)	Danio rerio		GO:0006810~transport,GO:0035879~plasma membrane lactate transport,GO:0055085~transmembrane transport,GO:1902598~creatine transmembrane transport,	GO:0005886~plasma membrane,GO:0005887~integral component of plasma membrane,GO:0016020~membrane,GO:0016021~integral component of membrane,	GO:0005308~creatine transmembrane transporter activity,GO:0015129~lactate transmembrane transporter activity,GO:0015293~symporter activity,	IPR011701:Major facilitator superfamily,IPR020846:Major facilitator superfamily domain,
ENSDARG00000055226	solute carrier family 7 (amino acid transporter light chain, y+L system), member 7(slc7a7)	Danio rerio	Amino acid transport and metabolism,	GO:0000821~regulation of arginine metabolic process,GO:0003333~amino acid transmembrane transport,GO:0014005~microglia development,	GO:0005887~integral component of plasma membrane,GO:0016020~membrane,GO:0016021~integral component of membrane,	GO:0015171~amino acid transmembrane transporter activity,GO:0015174~basic amino acid transmembrane transporter activity,GO:0015179~L-amino acid transmembrane transporter activity,GO:0015297~antiporter activity,	IPR002293:Amino acid/polyamine transporter I,
ENSDARG00000029832	solute carrier family 26 (anion exchanger), member 1(slc26a1)	Danio rerio		GO:0006810~transport,GO:0006811~ion transport,GO:0006821~chloride transport,GO:0008272~sulfate transport,GO:0015701~bicarbonate transport,GO:0019532~oxalate transport,GO:0042391~regulation of membrane potential,GO:0051453~regulation of intracellular pH,GO:0055085~transmembrane transport,GO:1902476~chloride transmembrane transport,	GO:0005887~integral component of plasma membrane,GO:0016020~membrane,GO:0016021~integral component of membrane,	GO:0005254~chloride channel activity,GO:0008271~secondary active sulfate transmembrane transporter activity,GO:0015106~bicarbonate transmembrane transporter activity,GO:0015108~chloride transmembrane transporter activity,GO:0015116~sulfate transmembrane transporter activity,GO:0015297~antiporter activity,GO:0015301~anion:anion antiporter activity,GO:0019531~oxalate transmembrane transporter activ…	IPR001902:Sulphate anion transporter,IPR002645:STAS domain,IPR011547:Sulphate transporter,IPR018045:Sulphate anion transporter, conserved site,
ENSDARG00000062182	solute carrier family 22 (organic anion transporter), member 7b, tandem duplicate 3(slc22a7b.3)	Danio rerio		GO:0055085~transmembrane transport,	GO:0005887~integral component of plasma membrane,GO:0016020~membrane,GO:0016021~integral component of membrane,	GO:0008514~organic anion transmembrane transporter activity,	IPR011701:Major facilitator superfamily,IPR020846:Major facilitator superfamily domain,
ENSDARG00000100919	solute carrier family 5 (sodium/glucose cotransporter), member 2(slc5a2)	Danio rerio		GO:0006810~transport,GO:0055085~transmembrane transport,	GO:0005887~integral component of plasma membrane,GO:0016020~membrane,GO:0016021~integral component of membrane,	GO:0005215~transporter activity,GO:0005362~low-affinity glucose:sodium symporter activity,	IPR001734:Sodium/solute symporter,IPR018212:Sodium/solute symporter, conserved site,
ENSDARG00000008263	major facilitator superfamily domain containing 4b(mfsd4b)	Danio rerio		GO:0055085~transmembrane transport,	GO:0016020~membrane,GO:0016021~integral component of membrane,	GO:0005355~glucose transmembrane transporter activity,	IPR011701:Major facilitator superfamily,IPR020846:Major facilitator superfamily domain,
ENSDARG00000056643	solute carrier family 22 (organic anion transporter), member 7b, tandem duplicate 1(slc22a7b.1)	Danio rerio		GO:0055085~transmembrane transport,	GO:0005887~integral component of plasma membrane,GO:0016020~membrane,GO:0016021~integral component of membrane,	GO:0008514~organic anion transmembrane transporter activity,GO:0022857~transmembrane transporter activity,	IPR005828:General substrate transporter,IPR020846:Major facilitator superfamily domain,
ENSDARG00000017773	solute carrier family 16, member 12a(slc16a12a)	Danio rerio		GO:0035879~plasma membrane lactate transport,GO:0055085~transmembrane transport,	GO:0005887~integral component of plasma membrane,GO:0016021~integral component of membrane,	GO:0015129~lactate transmembrane transporter activity,	IPR011701:Major facilitator superfamily,IPR020846:Major facilitator superfamily domain,
ENSDARG00000062947	amnion associated transmembrane protein(amn)	Danio rerio			GO:0016020~membrane,GO:0016021~integral component of membrane,		IPR026112:Amnionless,
ENSDARG00000094112	solute carrier family 22 (organic cation transporter), member 21(slc22a21)	Danio rerio		GO:0009437~carnitine metabolic process,GO:0015838~amino-acid betaine transport,GO:0055085~transmembrane transport,GO:1902603~carnitine transmembrane transport,	GO:0005887~integral component of plasma membrane,GO:0016020~membrane,GO:0016021~integral component of membrane,	GO:0005215~transporter activity,GO:0015199~amino-acid betaine transmembrane transporter activity,GO:0015226~carnitine transmembrane transporter activity,GO:0015491~cation:cation antiporter activity,GO:0022857~transmembrane transporter activity,	IPR005828:General substrate transporter,IPR005829:Sugar transporter, conserved site,IPR020846:Major facilitator superfamily domain,
ENSDARG00000016570	prolactin receptor a(prlra)	Danio rerio		GO:0038161~prolactin signaling pathway,	GO:0016020~membrane,GO:0016021~integral component of membrane,	GO:0004896~cytokine receptor activity,GO:0004925~prolactin receptor activity,	IPR003528:Long hematopoietin receptor, single chain, conserved site,IPR003961:Fibronectin, type III,IPR013783:Immunoglobulin-like fold,IPR015152:Growth hormone/erythropoietin receptor, ligand binding,	dre04630:Jak-STAT signaling pathway, dre04060:Cytokine-cytokine receptor interaction,dre04080:Neuroactive ligand-receptor interaction,
ENSDARG00000063288	solute carrier family 2 (facilitated glucose transporter), member 11b(slc2a11b)	Danio rerio		GO:0006810~transport,GO:0055085~transmembrane transport,	GO:0016020~membrane,GO:0016021~integral component of membrane,	GO:0005215~transporter activity,GO:0022857~transmembrane transporter activity,GO:0022891~substrate-specific transmembrane transporter activity,	IPR003663:Sugar/inositol transporter,IPR005828:General substrate transporter,IPR005829:Sugar transporter, conserved site,IPR020846:Major facilitator superfamily domain,

## Sheet: SI Table 9b
Supporting Information Table S9b: Differentially expressed gene groups for BPA exposure
Day 5 1000 ug/L BPA
Compilation of gene annotations from DAVID's Functional Annotation Table (for all differentially expressed genes)
Enriched genes and GOs according to DAVID's Gene Functional Classification
Enriched KEGG pathways (for zebrafish: dre) according to DAVID's Gene Functional Classification
NB Enrichment score = -log Geometric mean of P-vlaues and a value of >1.3 is equivalent to a non log Geometric mean of P-vlaue of <0.05
Gene group 1	Enrichment Score: 2.522333709340879
ENSEMBL_GENE_ID	Gene Name	Species	COG_ONTOLOGY	GOTERM_BP_DIRECT	GOTERM_CC_DIRECT	GOTERM_MF_DIRECT	INTERPRO	KEGG_PATHWAY
ENSDARG00000018721	nephronectin(npnt)	Danio rerio		GO:0003171~atrioventricular valve development,GO:0060347~heart trabecula formation,	GO:0016020~membrane,	GO:0005509~calcium ion binding,
ENSDARG00000075707	wu:fb77a09(wu:fb77a09)	Danio rerio		GO:0007160~cell-matrix adhesion,		GO:0005509~calcium ion binding,
ENSDARG00000093572	laminin, gamma 3(lamc3)	Danio rerio	DNA replication, recombination, and repair,				IPR000034:Laminin B type IV,IPR000742:Epidermal growth factor-like domain,IPR002049:EGF-like, laminin,IPR008211:Laminin, N-terminal,IPR008979:Galactose-binding domain-like,IPR013032:EGF-like, conserved site,	dre04510:Focal adhesion,dre04512:ECM-receptor interaction,
ENSDARG00000033950	laminin, beta 2-like(lamb2l)	Danio rerio	DNA replication, recombination, and repair,				IPR000742:Epidermal growth factor-like domain,IPR002049:EGF-like, laminin,IPR008211:Laminin, N-terminal,IPR013015:Laminin IV,IPR013032:EGF-like, conserved site,
ENSDARG00000093413	EGF-like repeats and discoidin I-like domains 3a(edil3a)	Danio rerio				GO:0005178~integrin binding,GO:0005509~calcium ion binding,	IPR000152:EGF-type aspartate/asparagine hydroxylation site,IPR000421:Coagulation factor 5/8 C-terminal type domain,IPR000742:Epidermal growth factor-like domain,IPR001881:EGF-like calcium-binding,IPR008979:Galactose-binding domain-like,IPR013032:EGF-like, conserved site,IPR018097:EGF-like calcium-binding, conserved site,
ENSDARG00000099446	slit homolog 1b (Drosophila)(slit1b)	Danio rerio	Function unknown,	GO:0007411~axon guidance,GO:0035385~Roundabout signaling pathway,GO:0048846~axon extension involved in axon guidance,GO:0050770~regulation of axonogenesis,	GO:0005578~proteinaceous extracellular matrix,GO:0005615~extracellular space,	GO:0005509~calcium ion binding,GO:0008201~heparin binding,GO:0048495~Roundabout binding,	IPR000152:EGF-type aspartate/asparagine hydroxylation site,IPR000372:Leucine-rich repeat-containing N-terminal,IPR000483:Cysteine-rich flanking region, C-terminal,IPR000742:Epidermal growth factor-like domain,IPR001611:Leucine-rich repeat,IPR001791:Laminin G domain,IPR001881:EGF-like calcium-binding,IPR003591:Leucine-rich repeat, typical subtype,IPR006207:Cystine knot, C-terminal,IPR009030:Insuli…
ENSDARG00000087013	cubilin (intrinsic factor-cobalamin receptor)(cubn)	Danio rerio		GO:0006898~receptor-mediated endocytosis,	GO:0016020~membrane,	GO:0004872~receptor activity,GO:0005509~calcium ion binding,	IPR000152:EGF-type aspartate/asparagine hydroxylation site,IPR000742:Epidermal growth factor-like domain,IPR000859:CUB domain,IPR001881:EGF-like calcium-binding,IPR013032:EGF-like, conserved site,IPR018097:EGF-like calcium-binding, conserved site,IPR024731:EGF domain, merozoite surface protein 1-like,
Gene Group 2	Enrichment Score: 2.2976510159763355
ENSEMBL_GENE_ID	Gene Name	Species	COG_ONTOLOGY	GOTERM_BP_DIRECT	GOTERM_CC_DIRECT	GOTERM_MF_DIRECT	INTERPRO	KEGG_PATHWAY
ENSDARG00000070913	SRY (sex determining region Y)-box 2(sox2)	Danio rerio		GO:0006351~transcription, DNA-templated,GO:0006355~regulation of transcription, DNA-templated,GO:0007275~multicellular organism development,GO:0008283~cell proliferation,GO:0021538~epithalamus development,GO:0021982~pineal gland development,GO:0031099~regeneration,GO:0031101~fin regeneration,GO:0048592~eye morphogenesis,GO:0051091~positive regulation of sequence-specific DNA binding transcription…	GO:0005634~nucleus,GO:0005667~transcription factor complex,GO:0005737~cytoplasm,	GO:0003677~DNA binding,GO:0003682~chromatin binding,GO:0003700~transcription factor activity, sequence-specific DNA binding,GO:0043565~sequence-specific DNA binding,	IPR009071:High mobility group (HMG) box domain,IPR022097:Transcription factor SOX,
ENSDARG00000088290	forkhead box J1b(foxj1b)	Danio rerio		GO:0001947~heart looping,GO:0003146~heart jogging,GO:0006351~transcription, DNA-templated,GO:0006355~regulation of transcription, DNA-templated,GO:0007368~determination of left/right symmetry,GO:0030030~cell projection organization,GO:0042384~cilium assembly,GO:0060088~auditory receptor cell stereocilium organization,GO:0060271~cilium morphogenesis,	GO:0005634~nucleus,	GO:0000981~RNA polymerase II transcription factor activity, sequence-specific DNA binding,GO:0003677~DNA binding,GO:0003700~transcription factor activity, sequence-specific DNA binding,GO:0043565~sequence-specific DNA binding,	IPR001766:Transcription factor, fork head,IPR011991:Winged helix-turn-helix DNA-binding domain,IPR018122:Transcription factor, fork head, conserved site,
ENSDARG00000102138	forkhead box A1(foxa1)	Danio rerio		GO:0006355~regulation of transcription, DNA-templated,GO:0048319~axial mesoderm morphogenesis,	GO:0005634~nucleus,	GO:0000981~RNA polymerase II transcription factor activity, sequence-specific DNA binding,GO:0003677~DNA binding,GO:0003700~transcription factor activity, sequence-specific DNA binding,GO:0008134~transcription factor binding,GO:0019904~protein domain specific binding,GO:0043565~sequence-specific DNA binding,	IPR001766:Transcription factor, fork head,IPR011991:Winged helix-turn-helix DNA-binding domain,IPR013638:Fork-head N-terminal,IPR018122:Transcription factor, fork head, conserved site,IPR018533:Forkhead box protein, C-terminal,			SM00339:FH,
ENSDARG00000039701	empty spiracles homeobox 2(emx2)	Danio rerio		GO:0006355~regulation of transcription, DNA-templated,GO:0007420~brain development,	GO:0005634~nucleus,	GO:0003677~DNA binding,GO:0043565~sequence-specific DNA binding,	IPR000047:Helix-turn-helix motif,IPR001356:Homeodomain,IPR009057:Homeodomain-like,IPR017970:Homeobox, conserved site,IPR020479:Homeodomain, metazoa,
ENSDARG00000001785	iroquois homeobox 2a(irx2a)	Danio rerio		GO:0006355~regulation of transcription, DNA-templated,GO:0060042~retina morphogenesis in camera-type eye,	GO:0005634~nucleus,	GO:0003677~DNA binding,GO:0043565~sequence-specific DNA binding,	IPR001356:Homeodomain,IPR003893:Iroquois-class homeodomain protein,IPR008422:Homeobox KN domain,IPR009057:Homeodomain-like,IPR017970:Homeobox, conserved site,
ENSDARG00000007407	BARX homeobox 1(barx1)	Danio rerio		GO:0002053~positive regulation of mesenchymal cell proliferation,GO:0006351~transcription, DNA-templated,GO:0006355~regulation of transcription, DNA-templated,GO:0006357~regulation of transcription from RNA polymerase II promoter,GO:0007399~nervous system development,GO:0051216~cartilage development,GO:0055123~digestive system development,GO:0060037~pharyngeal system development,	GO:0005634~nucleus,	GO:0000977~RNA polymerase II regulatory region sequence-specific DNA binding,GO:0001228~transcriptional activator activity, RNA polymerase II transcription regulatory region sequence-specific binding,GO:0003677~DNA binding,GO:0043565~sequence-specific DNA binding,	IPR000047:Helix-turn-helix motif,IPR001356:Homeodomain,IPR009057:Homeodomain-like,IPR017970:Homeobox, conserved site,IPR020479:Homeodomain, metazoa,
ENSDARG00000032963	hairy-related 12(her12)	Danio rerio		GO:0007219~Notch signaling, GO:0001756~somitogenesis,GO:0006351~transcription, DNA-templated,GO:0006355~regulation of transcription, DNA-templated, pathway,GO:0007420~brain development,	GO:0005634~nucleus,	GO:0003677~DNA binding,GO:0046983~protein dimerization activity,	IPR003650:Orange,IPR011598:Myc-type, basic helix-loop-helix (bHLH) domain,	dre04330:Notch signaling pathway,		SM00353:HLH,
ENSDARG00000056027	homeobox B8a(hoxb8a)	Danio rerio		GO:0006351~transcription, DNA-templated,GO:0006355~regulation of transcription, DNA-templated,GO:0007275~multicellular organism development,GO:0008283~cell proliferation,GO:0048920~posterior lateral line neuromast primordium migration,	GO:0005634~nucleus,	GO:0003677~DNA binding,GO:0003700~transcription factor activity, sequence-specific DNA binding,GO:0043565~sequence-specific DNA binding,	IPR000047:Helix-turn-helix motif,IPR001356:Homeodomain,IPR001827:Homeobox protein, antennapedia type, conserved site,IPR009057:Homeodomain-like,IPR017970:Homeobox, conserved site,IPR020479:Homeodomain, metazoa,
ENSDARG00000010630	homeobox B6a(hoxb6a)	Danio rerio		GO:0006351~transcription, DNA-templated,GO:0006355~regulation of transcription, DNA-templated,GO:0007275~multicellular organism development,	GO:0005634~nucleus,	GO:0003677~DNA binding,GO:0003700~transcription factor activity, sequence-specific DNA binding,GO:0043565~sequence-specific DNA binding,	IPR001356:Homeodomain,IPR001827:Homeobox protein, antennapedia type, conserved site,IPR009057:Homeodomain-like,IPR017970:Homeobox, conserved site,IPR017995:Homeobox protein, antennapedia type,IPR020479:Homeodomain, metazoa,
ENSDARG00000068407	SIX homeobox 9(six9)	Danio rerio		GO:0006355~regulation of transcription, DNA-templated,	GO:0005634~nucleus,	GO:0003677~DNA binding,GO:0043565~sequence-specific DNA binding,	IPR001356:Homeodomain,IPR009057:Homeodomain-like,IPR017970:Homeobox, conserved site,
ENSDARG00000013533	homeobox B4a(hoxb4a)	Danio rerio		GO:0006351~transcription, DNA-templated,GO:0006355~regulation of transcription, DNA-templated,GO:0007275~multicellular organism development,	GO:0005634~nucleus,	GO:0003677~DNA binding,GO:0003700~transcription factor activity, sequence-specific DNA binding,GO:0043565~sequence-specific DNA binding,	IPR001356:Homeodomain,IPR001827:Homeobox protein, antennapedia type, conserved site,IPR009057:Homeodomain-like,IPR017970:Homeobox, conserved site,IPR017995:Homeobox protein, antennapedia type,IPR020479:Homeodomain, metazoa,
ENSDARG00000029263	homeobox B3a(hoxb3a)	Danio rerio		GO:0006351~transcription, DNA-templated,GO:0006355~regulation of transcription, DNA-templated,GO:0007275~multicellular organism development,	GO:0005634~nucleus,	GO:0003677~DNA binding,GO:0003700~transcription factor activity, sequence-specific DNA binding,GO:0043565~sequence-specific DNA binding,	IPR001356:Homeodomain,IPR001827:Homeobox protein, antennapedia type, conserved site,IPR009057:Homeodomain-like,IPR017970:Homeobox, conserved site,IPR020479:Homeodomain, metazoa,IPR025281:Domain of unknown function DUF4074,
ENSDARG00000009134	H2.0-like homeo box 1 (Drosophila)(hlx1)	Danio rerio		GO:0002040~sprouting angiogenesis,GO:0006355~regulation of transcription, DNA-templated,	GO:0005634~nucleus,	GO:0003677~DNA binding,GO:0043565~sequence-specific DNA binding,	IPR000047:Helix-turn-helix motif,IPR001356:Homeodomain,IPR009057:Homeodomain-like,IPR017970:Homeobox, conserved site,IPR020479:Homeodomain, metazoa,
ENSDARG00000077982	E74-like factor 3 (ets domain transcription factor, epithelial-specific )(elf3)	Danio rerio		GO:0006355~regulation of transcription, DNA-templated,GO:0006357~regulation of transcription from RNA polymerase II promoter,GO:0006366~transcription from RNA polymerase II promoter,GO:0006954~inflammatory response,GO:0030154~cell differentiation,GO:0030855~epithelial cell differentiation,	GO:0005634~nucleus,	GO:0000981~RNA polymerase II transcription factor activity, sequence-specific DNA binding,GO:0003677~DNA binding,GO:0003700~transcription factor activity, sequence-specific DNA binding,GO:0043565~sequence-specific DNA binding,	IPR000418:Ets domain,IPR003118:Pointed domain,IPR011991:Winged helix-turn-helix DNA-binding domain,IPR013761:Sterile alpha motif/pointed domain,
ENSDARG00000033172	nuclear receptor subfamily 2, group F, member 5(nr2f5)	Danio rerio		GO:0006351~transcription, DNA-templated,GO:0006355~regulation of transcription, DNA-templated,GO:0007601~visual perception,GO:0032526~response to retinoic acid,GO:0043401~steroid hormone mediated signaling pathway,GO:0050896~response to stimulus,	GO:0005634~nucleus,	GO:0003677~DNA binding,GO:0003700~transcription factor activity, sequence-specific DNA binding,GO:0003707~steroid hormone receptor activity,GO:0004879~RNA polymerase II transcription factor activity, ligand-activated sequence-specific DNA binding,GO:0008270~zinc ion binding,GO:0043565~sequence-specific DNA binding,GO:0046872~metal ion binding,	IPR000536:Nuclear hormone receptor, ligand-binding, core,IPR001628:Zinc finger, nuclear hormone receptor-type,IPR001723:Steroid hormone receptor,IPR003068:Transcription factor COUP,IPR013088:Zinc finger, NHR/GATA-type,
ENSDARG00000042785	paired-like homeodomain 1(pitx1)	Danio rerio		GO:0006355~regulation of transcription, DNA-templated,GO:0007275~multicellular organism development,	GO:0005634~nucleus,	GO:0003677~DNA binding,GO:0003700~transcription factor activity, sequence-specific DNA binding,GO:0043565~sequence-specific DNA binding,	IPR001356:Homeodomain,IPR003654:OAR domain,IPR009057:Homeodomain-like,IPR016233:Homeobox protein Pitx/unc30,IPR017970:Homeobox, conserved site,IPR020479:Homeodomain, metazoa,
ENSDARG00000015399	forkhead box F1(foxf1)	Danio rerio		GO:0006355~regulation of transcription, DNA-templated,	GO:0005634~nucleus,	GO:0003677~DNA binding,GO:0003700~transcription factor activity, sequence-specific DNA binding,GO:0003705~transcription factor activity, RNA polymerase II distal enhancer sequence-specific binding,GO:0043565~sequence-specific DNA binding,	IPR001766:Transcription factor, fork head,IPR011991:Winged helix-turn-helix DNA-binding domain,IPR018122:Transcription factor, fork head, conserved site,
ENSDARG00000052695	nuclear receptor subfamily 2, group F, member 1a(nr2f1a)	Danio rerio		GO:0001935~endothelial cell proliferation,GO:0001944~vasculature development,GO:0006351~transcription, DNA-templated,GO:0006355~regulation of transcription, DNA-templated,GO:0043401~steroid hormone mediated signaling pathway,	GO:0005634~nucleus,	GO:0003677~DNA binding,GO:0003700~transcription factor activity, sequence-specific DNA binding,GO:0003707~steroid hormone receptor activity,GO:0004879~RNA polymerase II transcription factor activity, ligand-activated sequence-specific DNA binding,GO:0008270~zinc ion binding,GO:0043565~sequence-specific DNA binding,GO:0046872~metal ion binding,	IPR000536:Nuclear hormone receptor, ligand-binding, core,IPR001628:Zinc finger, nuclear hormone receptor-type,IPR001723:Steroid hormone receptor,IPR003068:Transcription factor COUP,IPR013088:Zinc finger, NHR/GATA-type,
ENSDARG00000012788	forkhead box A3(foxa3)	Danio rerio		GO:0006355~regulation of transcription, DNA-templated,GO:0007420~brain development,GO:0021999~neural plate anterior/posterior regionalization,GO:0033504~floor plate development,GO:0048319~axial mesoderm morphogenesis,GO:0048785~hatching gland development,	GO:0005634~nucleus,	GO:0000981~RNA polymerase II transcription factor activity, sequence-specific DNA binding,GO:0003677~DNA binding,GO:0003700~transcription factor activity, sequence-specific DNA binding,GO:0008134~transcription factor binding,GO:0019904~protein domain specific binding,GO:0043565~sequence-specific DNA binding,	IPR001766:Transcription factor, fork head,IPR011991:Winged helix-turn-helix DNA-binding domain,IPR013638:Fork-head N-terminal,IPR018122:Transcription factor, fork head, conserved site,IPR018533:Forkhead box protein, C-terminal,
ENSDARG00000013441	hes-related family bHLH transcription factor with YRPW motif 2(hey2)	Danio rerio		GO:0001568~blood vessel development,GO:0001570~vasculogenesis,GO:0006351~transcription, DNA-templated,GO:0006355~regulation of transcription, DNA-templated,GO:0007219~Notch signaling pathway,GO:0007275~multicellular organism development,GO:0007507~heart development,GO:0035912~dorsal aorta morphogenesis,GO:0045892~negative regulation of transcription, DNA-templated,GO:0048514~blood vessel morphoge…	GO:0005634~nucleus,	GO:0003677~DNA binding,GO:0005515~protein binding,GO:0046983~protein dimerization activity,	IPR003650:Orange,IPR011598:Myc-type, basic helix-loop-helix (bHLH) domain,
ENSDARG00000008133	forkhead box L1(foxl1)	Danio rerio		GO:0006355~regulation of transcription, DNA-templated,GO:0007420~brain development,GO:0035138~pectoral fin morphogenesis,GO:0043010~camera-type eye development,GO:0045892~negative regulation of transcription, DNA-templated,GO:0051216~cartilage development,	GO:0005634~nucleus,	GO:0000981~RNA polymerase II transcription factor activity, sequence-specific DNA binding,GO:0003677~DNA binding,GO:0003700~transcription factor activity, sequence-specific DNA binding,GO:0043565~sequence-specific DNA binding,	IPR001766:Transcription factor, fork head,IPR011991:Winged helix-turn-helix DNA-binding domain,IPR018122:Transcription factor, fork head, conserved site,
ENSDARG00000010770	SRY (sex determining region Y)-box 19a(sox19a)	Danio rerio		GO:0006351~transcription, DNA-templated,GO:0006355~regulation of transcription, DNA-templated,GO:0007275~multicellular organism development,GO:0007399~nervous system development,GO:0030154~cell differentiation,GO:0051091~positive regulation of sequence-specific DNA binding transcription factor activity,	GO:0005634~nucleus,GO:0005667~transcription factor complex,	GO:0003677~DNA binding,GO:0003700~transcription factor activity, sequence-specific DNA binding,	IPR009071:High mobility group (HMG) box domain,IPR022097:Transcription factor SOX,
ENSDARG00000029179	forkhead box D1(foxd1)	Danio rerio		GO:0006355~regulation of transcription, DNA-templated,	GO:0005634~nucleus,	GO:0000981~RNA polymerase II transcription factor activity, sequence-specific DNA binding,GO:0003677~DNA binding,GO:0003700~transcription factor activity, sequence-specific DNA binding,GO:0043565~sequence-specific DNA binding,	IPR001766:Transcription factor, fork head,IPR011991:Winged helix-turn-helix DNA-binding domain,IPR018122:Transcription factor, fork head, conserved site,
ENSDARG00000103862	homeobox A3a(hoxa3a)	Danio rerio		GO:0006351~transcription, DNA-templated,GO:0006355~regulation of transcription, DNA-templated,GO:0007275~multicellular organism development,GO:0048538~thymus development,GO:0060017~parathyroid gland development,	GO:0005634~nucleus,	GO:0003677~DNA binding,GO:0003700~transcription factor activity, sequence-specific DNA binding,GO:0043565~sequence-specific DNA binding,	IPR001356:Homeodomain,IPR001827:Homeobox protein, antennapedia type, conserved site,IPR009057:Homeodomain-like,IPR017970:Homeobox, conserved site,IPR020479:Homeodomain, metazoa,IPR025281:Domain of unknown function DUF4074,
ENSDARG00000017195	forkhead box F2a(foxf2a)	Danio rerio		GO:0006351~transcription, DNA-templated,GO:0006355~regulation of transcription, DNA-templated,GO:0007275~multicellular organism development,GO:0048538~thymus development,GO:0060017~parathyroid gland development,	GO:0005634~nucleus,	GO:0003677~DNA binding,GO:0003700~transcription factor activity, sequence-specific DNA binding,GO:0043565~sequence-specific DNA binding,	IPR001356:Homeodomain,IPR001827:Homeobox protein, antennapedia type, conserved site,IPR009057:Homeodomain-like,IPR017970:Homeobox, conserved site,IPR020479:Homeodomain, metazoa,IPR025281:Domain of unknown function DUF4074,
ENSDARG00000039569	empty spiracles homeobox 1(emx1)	Danio rerio		GO:0006355~regulation of transcription, DNA-templated,GO:0007275~multicellular organism development,	GO:0005634~nucleus,	GO:0003677~DNA binding,GO:0043565~sequence-specific DNA binding,	IPR000047:Helix-turn-helix motif,IPR001356:Homeodomain,IPR009057:Homeodomain-like,IPR017970:Homeobox, conserved site,IPR020479:Homeodomain, metazoa,
ENSDARG00000013057	homeobox B5a(hoxb5a)	Danio rerio		GO:0001708~cell fate specification,GO:0006351~transcription, DNA-templated,GO:0006355~regulation of transcription, DNA-templated,GO:0007275~multicellular organism development,GO:0007420~brain development,	GO:0005634~nucleus,	GO:0003677~DNA binding,GO:0003700~transcription factor activity, sequence-specific DNA binding,GO:0043565~sequence-specific DNA binding,	IPR001356:Homeodomain,IPR001827:Homeobox protein, antennapedia type, conserved site,IPR009057:Homeodomain-like,IPR017970:Homeobox, conserved site,IPR017995:Homeobox protein, antennapedia type,IPR020479:Homeodomain, metazoa,
ENSDARG00000013615	pre-B-cell leukemia homeobox 3b(pbx3b)	Danio rerio		GO:0006355~regulation of transcription, DNA-templated,	GO:0005634~nucleus,	GO:0003677~DNA binding,GO:0003700~transcription factor activity, sequence-specific DNA binding,GO:0043565~sequence-specific DNA binding,	IPR001356:Homeodomain,IPR005542:PBX,IPR009057:Homeodomain-like,IPR017970:Homeobox, conserved site,
Gene Group 3	Enrichment Score: 1.9894371622438762
ENSEMBL_GENE_ID	Gene Name	Species	COG_ONTOLOGY	GOTERM_BP_DIRECT	GOTERM_CC_DIRECT	GOTERM_MF_DIRECT	INTERPRO	KEGG_PATHWAY
ENSDARG00000061830	protease, serine, 12 (neurotrypsin, motopsin)(prss12)	Danio rerio		GO:0006508~proteolysis,	GO:0016020~membrane,	GO:0004252~serine-type endopeptidase activity,GO:0005044~scavenger receptor activity,GO:0008233~peptidase activity,GO:0008236~serine-type peptidase activity,GO:0016787~hydrolase activity,	IPR000001:Kringle,IPR001190:Speract/scavenger receptor,IPR001254:Peptidase S1,IPR001314:Peptidase S1A, chymotrypsin-type,IPR009003:Trypsin-like cysteine/serine peptidase domain,IPR013806:Kringle-like fold,IPR017448:Speract/scavenger receptor-related,IPR018056:Kringle, conserved site,
ENSDARG00000098686	transmembrane protease, serine 2(tmprss2)	Danio rerio		GO:0006508~proteolysis,	GO:0016020~membrane,GO:0016021~integral component of membrane,	GO:0004252~serine-type endopeptidase activity,GO:0008233~peptidase activity,GO:0008236~serine-type peptidase activity,GO:0016787~hydrolase activity,	IPR001254:Peptidase S1,IPR001314:Peptidase S1A, chymotrypsin-type,IPR002172:Low-density lipoprotein (LDL) receptor class A repeat,IPR009003:Trypsin-like cysteine/serine peptidase domain,IPR017448:Speract/scavenger receptor-related,IPR018114:Peptidase S1, trypsin family, active site,
ENSDARG00000036041	coagulation factor II (thrombin)(f2)	Danio rerio		GO:0006508~proteolysis,GO:0007596~blood coagulation,	GO:0005576~extracellular region,	GO:0005509~calcium ion binding, GO:0004252~serine-type endopeptidase activity,,GO:0008233~peptidase activity,GO:0008236~serine-type peptidase activity,GO:0016787~hydrolase activity,	IPR000001:Kringle,IPR000294:Gamma-carboxyglutamic acid-rich (GLA) domain,IPR001254:Peptidase S1,IPR001314:Peptidase S1A, chymotrypsin-type,IPR003966:Prothrombin/thrombin,IPR009003:Trypsin-like cysteine/serine peptidase domain,IPR012224:Peptidase S1A, coagulation factor VII/IX/X/C/Z,IPR013806:Kringle-like fold,IPR017857:Coagulation factor, subgroup, Gla domain,IPR018056:Kringle, conserved site,IPR…
ENSDARG00000102332	serine peptidase inhibitor, Kunitz type 1 a(spint1a)	Danio rerio		GO:0006508~proteolysis,GO:0008544~epidermis development,GO:0030199~collagen fibril organization,GO:0030593~neutrophil chemotaxis,GO:0060429~epithelium development,	GO:0016020~membrane,GO:0016021~integral component of membrane,	GO:0004867~serine-type endopeptidase inhibitor activity,GO:0008233~peptidase activity,GO:0016787~hydrolase activity,	IPR000601:PKD domain,IPR002172:Low-density lipoprotein (LDL) receptor class A repeat,IPR002223:Proteinase inhibitor I2, Kunitz metazoa,IPR011106:Seven cysteines, N-terminal,IPR013980:Seven cysteines,IPR020901:Proteinase inhibitor I2, Kunitz, conserved site,IPR022409:PKD/Chitinase domain,IPR023415:Low-density lipoprotein (LDL) receptor class A, conserved site,
ENSDARG00000061173	suppression of tumorigenicity 14 (colon carcinoma) a(st14a)	Danio rerio		GO:0006508~proteolysis,GO:0008544~epidermis development,	GO:0016020~membrane,GO:0016021~integral component of membrane,	GO:0004252~serine-type endopeptidase activity,GO:0008233~peptidase activity,GO:0008236~serine-type peptidase activity,GO:0016787~hydrolase activity,	IPR000082:SEA domain,IPR000859:CUB domain,IPR001254:Peptidase S1,IPR001314:Peptidase S1A, chymotrypsin-type,IPR002172:Low-density lipoprotein (LDL) receptor class A repeat,IPR009003:Trypsin-like cysteine/serine peptidase domain,IPR017051:Peptidase S1A, matripase,IPR018114:Peptidase S1, trypsin family, active site,IPR023415:Low-density lipoprotein (LDL) receptor class A, conserved site,
ENSDARG00000027609	si:dkey-33i11.3(si:dkey-33i11.3)	Danio rerio		GO:0072378~blood coagulation, fibrin clot formation,GO:1900003~regulation of serine-type endopeptidase activity,	GO:0016020~membrane,GO:0016021~integral component of membrane,	GO:0004252~serine-type endopeptidase activity,GO:0005044~scavenger receptor activity,GO:0070008~serine-type exopeptidase activity,	IPR001190:Speract/scavenger receptor,IPR001254:Peptidase S1,IPR001314:Peptidase S1A, chymotrypsin-type,IPR009003:Trypsin-like cysteine/serine peptidase domain,IPR015352:Hepsin, SRCR,IPR017448:Speract/scavenger receptor-related,IPR018114:Peptidase S1, trypsin family, active site,
ENSDARG00000040513	zgc:92313(zgc:92313)	Danio rerio		GO:0006508~proteolysis,		GO:0004252~serine-type endopeptidase activity,GO:0008233~peptidase activity,GO:0008236~serine-type peptidase activity,GO:0016787~hydrolase activity,	IPR001254:Peptidase S1,IPR001314:Peptidase S1A, chymotrypsin-type,IPR009003:Trypsin-like cysteine/serine peptidase domain,IPR018114:Peptidase S1, trypsin family, active site,
ENSDARG00000027196	si:dkey-16l2.17(si:dkey-16l2.17)	Danio rerio		GO:0006508~proteolysis,		GO:0004252~serine-type endopeptidase activity,GO:0008233~peptidase activity,GO:0008236~serine-type peptidase activity,GO:0016787~hydrolase activity,	IPR001254:Peptidase S1,IPR001314:Peptidase S1A, chymotrypsin-type,IPR009003:Trypsin-like cysteine/serine peptidase domain,IPR018114:Peptidase S1, trypsin family, active site,
ENSDARG00000023111	plasminogen(plg)	Danio rerio		GO:0006508~proteolysis,GO:0007596~blood coagulation,GO:0007599~hemostasis,GO:0042730~fibrinolysis,GO:0048771~tissue remodeling,	GO:0005576~extracellular region,	GO:0004252~serine-type endopeptidase activity,GO:0008233~peptidase activity,GO:0008236~serine-type peptidase activity,GO:0016787~hydrolase activity,	IPR000001:Kringle,IPR001254:Peptidase S1,IPR001314:Peptidase S1A, chymotrypsin-type,IPR003609:Apple-like,IPR009003:Trypsin-like cysteine/serine peptidase domain,IPR013806:Kringle-like fold,IPR018056:Kringle, conserved site,IPR018114:Peptidase S1, trypsin family, active site,IPR023317:Peptidase S1A, plasmin,	dre04080:Neuroactive ligand-receptor interaction,
ENSDARG00000013892	sortilin-related receptor, L(DLR class) A repeats containing(sorl1)	Danio rerio		GO:0006810~transport,	GO:0005794~Golgi apparatus,GO:0016020~membrane,GO:0016021~integral component of membrane,		IPR000033:LDLR class B repeat,IPR002172:Low-density lipoprotein (LDL) receptor class A repeat,IPR003961:Fibronectin, type III,IPR006581:VPS10,IPR011042:Six-bladed beta-propeller, TolB-like,IPR013783:Immunoglobulin-like fold,IPR023415:Low-density lipoprotein (LDL) receptor class A, conserved site,

## Sheet: SI Table 9c
Supporting Informationl Table S9c: Differentially expressed gene groups for BPA exposure
Day 15 1000 ug/L BPA
Compilation of gene annotations from DAVID's Functional Annotation Table (for all differentially expressed genes)
Enriched genes and GOs according to DAVID's Gene Functional Classification
Enriched KEGG pathways (for zebrafish: dre) according to DAVID's Gene Functional Classification
NB Enrichment score = -log Geometric mean of P-vlaues and a value of >1.3 is equivalent to a non log Geometric mean of P-vlaue of <0.05
Gene group 1	Enrichment Score: 1.4010013625695974
ENSEMBL_GENE_ID	Gene Name	Species	COG_ONTOLOGY	GOTERM_BP_DIRECT	GOTERM_CC_DIRECT	GOTERM_MF_DIRECT	INTERPRO	KEGG_PATHWAY
ENSDARG00000041691	basic helix-loop-helix family, member e41(bhlhe41)	Danio rerio		GO:0006351~transcription, DNA-templated,GO:0006355~regulation of transcription, DNA-templated,GO:0045892~negative regulation of transcription, DNA-templated,	GO:0005634~nucleus,	GO:0003677~DNA binding,GO:0046983~protein dimerization activity,	IPR003650:Orange,IPR011598:Myc-type, basic helix-loop-helix (bHLH) domain,
ENSDARG00000094965	nuclear factor, interleukin 3 regulated, member 5(nfil3-5)	Danio rerio		GO:0006355~regulation of transcription, DNA-templated,GO:0007623~circadian rhythm,GO:0032922~circadian regulation of gene expression,	GO:0005634~nucleus,	GO:0001078~transcriptional repressor activity, RNA polymerase II core promoter proximal region sequence-specific binding,GO:0003700~transcription factor activity, sequence-specific DNA binding,GO:0043565~sequence-specific DNA binding,	IPR004827:Basic-leucine zipper domain,
ENSDARG00000039117	thyrotrophic embryonic factor a(tefa)	Danio rerio		GO:0006355~regulation of transcription, DNA-templated,GO:0007275~multicellular organism development,GO:0045893~positive regulation of transcription, DNA-templated,GO:0071482~cellular response to light stimulus,	GO:0005634~nucleus,	GO:0000977~RNA polymerase II regulatory region sequence-specific DNA binding,GO:0001077~transcriptional activator activity, RNA polymerase II core promoter proximal region sequence-specific binding,GO:0003700~transcription factor activity, sequence-specific DNA binding,GO:0043565~sequence-specific DNA binding,	IPR004827:Basic-leucine zipper domain,
ENSDARG00000033160	nuclear receptor subfamily 1, group d, member 1(nr1d1)	Danio rerio		GO:0043401~steroid hormone mediated signaling pathway, GO:0006351~transcription, DNA-templated,GO:0006355~regulation of transcription, DNA-templated,	GO:0005634~nucleus,	GO:0001078~transcriptional repressor activity, RNA polymerase II core promoter proximal region sequence-specific binding,GO:0003677~DNA binding,GO:0003700~transcription factor activity, sequence-specific DNA binding,GO:0003707~steroid hormone receptor activity,GO:0004887~thyroid hormone receptor activity,GO:0008270~zinc ion binding,GO:0043565~sequence-specific DNA binding,GO:0046872~metal ion bin…	IPR000536:Nuclear hormone receptor, ligand-binding, core,IPR001628:Zinc finger, nuclear hormone receptor-type,IPR001723:Steroid hormone receptor,IPR001728:Thyroid hormone receptor,IPR013088:Zinc finger, NHR/GATA-type,
ENSDARG00000030616	nuclear factor, erythroid 2-like 1a(nfe2l1a)	Danio rerio		GO:0006351~transcription, DNA-templated,GO:0006355~regulation of transcription, DNA-templated,GO:0006357~regulation of transcription from RNA polymerase II promoter,GO:0045893~positive regulation of transcription, DNA-templated,	GO:0005634~nucleus,GO:0005737~cytoplasm,	GO:0000976~transcription regulatory region sequence-specific DNA binding,GO:0003677~DNA binding,GO:0003700~transcription factor activity, sequence-specific DNA binding,GO:0043565~sequence-specific DNA binding,	IPR004826:Basic leucine zipper domain, Maf-type,IPR004827:Basic-leucine zipper domain,IPR008917:Eukaryotic transcription factor, Skn-1-like, DNA-binding,
ENSDARG00000053097	heat shock transcription factor 2(hsf2)	Danio rerio		GO:0006355~regulation of transcription, DNA-templated,GO:0006357~regulation of transcription from RNA polymerase II promoter,	GO:0005634~nucleus,	GO:0003677~DNA binding,GO:0003700~transcription factor activity, sequence-specific DNA binding,GO:0043565~sequence-specific DNA binding,	IPR000232:Heat shock factor (HSF)-type, DNA-binding,IPR010542:Vertebrate heat shock transcription factor,IPR011991:Winged helix-turn-helix DNA-binding domain,

## Sheet: SI Table 9d
Supporting Information Table S9d: Differentially expressed gene groups for MBP exposure
Day 5 25 ug/L MBP
Compilation of gene annotations from DAVID's Functional Annotation Table (for all differentially expressed genes)
Enriched genes and GOs according to DAVID's Gene Functional Classification
Enriched KEGG pathways (for zebrafish: dre) according to DAVID's Gene Functional Classification
NB Enrichment score = -log Geometric mean of P-vlaues and a value of >1.3 is equivalent to a non log Geometric mean of P-vlaue of <0.05
Gene Group 1	Enrichment Score: 9.242496313394554
ENTREZ_GENE_ID	Gene Name	Species	COG_ONTOLOGY	GOTERM_BP_DIRECT	GOTERM_CC_DIRECT	GOTERM_MF_DIRECT	INTERPRO	KEGG_PATHWAY
567110	collagen, type IX, alpha 3(col9a3)	Danio rerio		GO:0005578~proteinaceous extracellular matrix,	GO:0005201~extracellular matrix structural constituent,	IPR003979:Tropoelastin,IPR008160:Collagen triple helix repeat,				Complete proteome,Proteomics identification,Reference proteome,Signal,
561679	collagen, type XI, alpha 2(col11a2)	Danio rerio		GO:0060536~cartilage morphogenesis,	GO:0005576~extracellular region,GO:0005578~proteinaceous extracellular matrix,GO:0005581~collagen trimer,	GO:0005201~extracellular matrix structural constituent,	IPR000885:Fibrillar collagen, C-terminal,IPR001791:Laminin G domain,IPR008160:Collagen triple helix repeat,IPR013320:Concanavalin A-like lectin/glucanase, subgroup,	dre04510:Focal adhesion,dre04512:ECM-receptor interaction,		SM00038:COLFI,SM00210:TSPN,SM00282:LamG,	Collagen,Complete proteome,Extracellular matrix,Proteomics identification,Reference proteome,Secreted,Signal,
325675	collagen, type I, alpha 1b(col1a1b)	Danio rerio			GO:0005576~extracellular region,GO:0005578~proteinaceous extracellular matrix,GO:0005581~collagen trimer,	GO:0005201~extracellular matrix structural constituent,	IPR000885:Fibrillar collagen, C-terminal,IPR001007:von Willebrand factor, type C,IPR008160:Collagen triple helix repeat,	dre04510:Focal adhesion,dre04512:ECM-receptor interaction,		SM00038:COLFI,SM00214:VWC,	Collagen,Complete proteome,Extracellular matrix,Proteomics identification,Reference proteome,Secreted,Signal,
321212	procollagen, type IX, alpha 2(col9a2)	Danio rerio			GO:0005581~collagen trimer,		IPR008160:Collagen triple helix repeat,				Collagen,Complete proteome,Proteomics identification,Reference proteome,Signal,
100294690	collagen type XXVIII alpha 1 a(col28a1a)	Danio rerio			GO:0005578~proteinaceous extracellular matrix,GO:0005581~collagen trimer,	GO:0004867~serine-type endopeptidase inhibitor activity,	IPR002035:von Willebrand factor, type A,IPR002223:Proteinase inhibitor I2, Kunitz metazoa,IPR008160:Collagen triple helix repeat,IPR020901:Proteinase inhibitor I2, Kunitz, conserved site,			SM00131:KU,SM00327:VWA,	Collagen,Extracellular matrix,Secreted,Signal,	chain:collagen type XXVIII alpha 1 a,signal peptide,
565402	collagen, type XI, alpha 1a(col11a1a)	Danio rerio			GO:0005576~extracellular region,GO:0005578~proteinaceous extracellular matrix,GO:0005581~collagen trimer,	GO:0005201~extracellular matrix structural constituent,	IPR000885:Fibrillar collagen, C-terminal,IPR001791:Laminin G domain,IPR002181:Fibrinogen, alpha/beta/gamma chain, C-terminal globular domain,IPR008160:Collagen triple helix repeat,IPR013320:Concanavalin A-like lectin/glucanase, subgroup,	dre04510:Focal adhesion,dre04512:ECM-receptor interaction,		SM00038:COLFI,SM00210:TSPN,	Collagen,Complete proteome,Extracellular matrix,Proteomics identification,Reference proteome,Secreted,
794479	collagen, type VIII, alpha 2(col8a2)	Danio rerio			GO:0005576~extracellular region,GO:0005581~collagen trimer,		IPR001073:Complement C1q protein,IPR008160:Collagen triple helix repeat,IPR008983:Tumour necrosis factor-like domain,			SM00110:C1Q,	Collagen,Complete proteome,Reference proteome,Secreted,
562496	collagen, type II, alpha 1a(col2a1a)	Danio rerio		GO:0030903~notochord development,	GO:0005576~extracellular region,GO:0005578~proteinaceous extracellular matrix,GO:0005581~collagen trimer,	GO:0005201~extracellular matrix structural constituent,	IPR000885:Fibrillar collagen, C-terminal,IPR001007:von Willebrand factor, type C,IPR008160:Collagen triple helix repeat,	dre04510:Focal adhesion,dre04512:ECM-receptor interaction,		SM00038:COLFI,SM00214:VWC,	Collagen,Complete proteome,Extracellular matrix,Proteomics identification,Reference proteome,Secreted,Signal,
503730	collagen, type II, alpha 1b(col2a1b)	Danio rerio		GO:0033333~fin development,GO:0033334~fin morphogenesis,	GO:0005576~extracellular region,GO:0005578~proteinaceous extracellular matrix,GO:0005581~collagen trimer,	GO:0005201~extracellular matrix structural constituent,	IPR000885:Fibrillar collagen, C-terminal,IPR001007:von Willebrand factor, type C,IPR008160:Collagen triple helix repeat,	dre04510:Focal adhesion,dre04512:ECM-receptor interaction,		SM00038:COLFI,SM00214:VWC,	Collagen,Complete proteome,Extracellular matrix,Reference proteome,Secreted,Signal,
555202	collagen, type XI, alpha 1b(col11a1b)	Danio rerio			GO:0005576~extracellular region,GO:0005578~proteinaceous extracellular matrix,GO:0005581~collagen trimer,	GO:0005201~extracellular matrix structural constituent,	IPR000885:Fibrillar collagen, C-terminal,IPR001791:Laminin G domain,IPR008160:Collagen triple helix repeat,IPR013320:Concanavalin A-like lectin/glucanase, subgroup,			SM00038:COLFI,SM00210:TSPN,	Collagen,Complete proteome,Extracellular matrix,Reference proteome,Secreted,
337158	collagen, type I, alpha 1a(col1a1a)	Danio rerio		GO:0030278~regulation of ossification,GO:0031101~fin regeneration,GO:0033333~fin development,GO:0033334~fin morphogenesis,GO:0033339~pectoral fin development,	GO:0005576~extracellular region,GO:0005578~proteinaceous extracellular matrix,GO:0005581~collagen trimer,GO:0005737~cytoplasm,	GO:0005201~extracellular matrix structural constituent,	IPR000885:Fibrillar collagen, C-terminal,IPR001007:von Willebrand factor, type C,IPR008160:Collagen triple helix repeat,	dre04510:Focal adhesion,dre04512:ECM-receptor interaction,		SM00038:COLFI,SM00214:VWC,	Collagen,Complete proteome,Extracellular matrix,Proteomics identification,Reference proteome,Secreted,Signal,
Gene Group 2	Enrichment Score: 2.961892152296895
ENTREZ_GENE_ID	Gene Name
100009654	zgc:158846(zgc:158846)	Species	COG_ONTOLOGY	GOTERM_BP_DIRECT	GOTERM_CC_DIRECT	GOTERM_MF_DIRECT	INTERPRO	KEGG_PATHWAY
792062	type I cytokeratin, enveloping layer, like(cyt1l)	Danio rerio			GO:0005882~intermediate filament,	GO:0005198~structural molecule activity,	IPR001664:Intermediate filament protein,IPR002957:Keratin, type I,			SM01391:SM01391,	Coiled coil,Complete proteome,Intermediate filament,Proteomics identification,Reference proteome,
797351	keratin 5(krt5)	Danio rerio		GO:0031101~fin regeneration,	GO:0005882~intermediate filament,GO:0045095~keratin filament,	GO:0005198~structural molecule activity,	IPR001664:Intermediate filament protein,IPR003054:Type II keratin,IPR009053:Prefoldin,IPR018039:Intermediate filament protein, conserved site,			SM01391:SM01391,	Coiled coil,Complete proteome,Intermediate filament,Keratin,Proteomics identification,Reference proteome,
794486	keratin 4(krt4)	Danio rerio		GO:0005882~intermediate filament,GO:0045095~keratin filament,	GO:0005198~structural molecule activity,	IPR001664:Intermediate filament protein,IPR003054:Type II keratin,IPR009053:Prefoldin,IPR018039:Intermediate filament protein, conserved site,			SM01391:SM01391,	Coiled coil,Complete proteome,Intermediate filament,Reference proteome,
30327	type I cytokeratin, enveloping layer(cyt1)	Danio rerio		GO:0042074~cell migration involved in gastrulation,	GO:0005882~intermediate filament,	GO:0005198~structural molecule activity,	IPR001664:Intermediate filament protein,IPR002957:Keratin, type I,			SM01391:SM01391,	Coiled coil,Complete proteome,Intermediate filament,Proteomics identification,Reference proteome,

## Sheet: SI Table 10a
Supporting Information Table S10a: Enrichment of Reactome pathways represented by differentially expressed genes
Day 5 100 ug/L BPA
Compilation of Reactome (v66) pathways (for all differentially expressed genes)
Pathways were considered to be enriched when p-values adjusted for False Dicovery Rate (FDR) for multiple-testing were < 0.1
Pathway identifier	Pathway name	#Entities found	#Entities total	Entities ratio	Entities pValue	Entities FDR	#Reactions found	#Reactions total	Reactions ratio	Species identifier	Species name	Submitted entities found	Mapped entities	Found reaction identifiers
R-HSA-3359463	Defective CUBN causes hereditary megaloblastic anemia 1	2	4	0.000286062	0.000700617	0.0609007	1	1	8.4832e-05	9606	Homo sapiens	cubn;amn		R-HSA-3296462
R-HSA-3359462	Defective AMN causes hereditary megaloblastic anemia 1	2	4	0.000286062	0.000700617	0.0609007	1	1	8.4832e-05	9606	Homo sapiens	cubn;amn		R-HSA-3296477
R-HSA-70921	Histidine catabolism	3	13	0.00121698	0.000842742	0.0609007	3	8	0.000678656	9606	Homo sapiens	AMDHD1;uroc1;ftcd		R-HSA-70903;R-HSA-70920;R-HSA-70906
R-HSA-427601	Multifunctional anion exchangers	3	19	0.00135879	0.000842742	0.0609007	3	6	0.000508992	9606	Homo sapiens	slc26a6;slc5a12;slc26a1		R-HSA-427666;R-HSA-427555;R-HSA-8876312
R-HSA-425393	Transport of inorganic cations/anions and amino acids/oligopeptides	7	165	0.0118	0.00108751	0.0609007	7	75	0.0063624	9606	Homo sapiens	slc26a6;slc5a12;slc20a1a;slc34a1a;slc26a1;slc7a7;slc24a2		R-HSA-379415;R-HSA-427605;R-HSA-427666;R-HSA-427555;R-HSA-425678;R-HSA-427656;R-HSA-8876312
R-HSA-8964011	HDL clearance	2	9	0.000643639	0.00343833	0.110027	2	5	0.00042416	9606	Homo sapiens	cubn;amn		R-HSA-264848;R-HSA-264834
R-HSA-427652	Sodium-coupled phosphate cotransporters	2	8	0.000572123	0.00273362	0.110027	2	3	0.000254496	9606	Homo sapiens	slc20a1a;slc34a1a		R-HSA-427605;R-HSA-427656
R-HSA-2129379	Molecules associated with elastic fibres	3	38	0.00271759	0.00591476	0.155926	4	10	0.00084832	9606	Homo sapiens	mfap2;bmp2b		R-HSA-2161282;R-HSA-2328048;R-HSA-2396399;R-HSA-1592387
R-HSA-425407	SLC-mediated transmembrane transport	10	412	0.0294643	0.00623705	0.155926	11	184	0.0156091	9606	Homo sapiens	slc26a6;slc5a2;slc5a12;slc20a1a;slc22a21;slc34a1a;slc26a1;slc7a7;slc22a4;slc24a2		R-HSA-549241;R-HSA-379415;R-HSA-427605;R-HSA-427666;R-HSA-427555;R-HSA-425678;R-HSA-549297;R-HSA-189208;R-HSA-429613;R-HSA-427656;R-HSA-8876312
R-HSA-1566948	Elastic fibre formation	3	46	0.00328971	0.0099327	0.218519	7	17	0.00144214	9606	Homo sapiens	mfap2;bmp2b		R-HSA-2161282;R-HSA-2328048;R-HSA-2129353;R-HSA-2129385;R-HSA-2396399;R-HSA-1592387;R-HSA-2129375
R-HSA-196836	Vitamin C (ascorbate) metabolism	2	20	0.00143031	0.0158637	0.317274	1	5	0.00042416	9606	Homo sapiens	slc23a1		R-HSA-198870
R-HSA-5658208	Defective SLC5A2 causes renal glucosuria (GLYS1)	1	3	0.000214546	0.0281344	0.45015	1	1	8.4832e-05	9606	Homo sapiens	slc5a2		R-HSA-5658163
R-HSA-5619053	Defective SLC22A5 causes systemic primary carnitine deficiency (CDSP)	1	3	0.000214546	0.0281344	0.45015	1	1	8.4832e-05	9606	Homo sapiens	slc22a21		R-HSA-5625674
R-HSA-5619040	Defective SLC34A1 causes hypophosphatemic nephrolithiasis/osteoporosis 1 (NPHLOP1)	1	3	0.000214546	0.0281344	0.45015	1	1	8.4832e-05	9606	Homo sapiens	slc34a1a		R-HSA-5651685
R-HSA-3296469	Defects in cobalamin (B12) metabolism	2	31	0.00221698	0.0356283	0.466234	2	16	0.00135731	9606	Homo sapiens	cubn;amn		R-HSA-3296462;R-HSA-3296477
R-HSA-5660862	Defective SLC7A7 causes lysinuric protein intolerance (LPI)	1	4	0.000286062	0.0373368	0.466234	1	1	8.4832e-05	9606	Homo sapiens	slc7a7		R-HSA-5660910
R-HSA-5173105	O-linked glycosylation	4	133	0.00951155	0.0388967	0.466234	5	26	0.00220563	9606	Homo sapiens	large2;galnt11;galnt14;adamts13		R-HSA-5617143;R-HSA-5173005;R-HSA-913675;R-HSA-5173192;R-HSA-5617138
R-HSA-6788656	Histidine, lysine, phenylalanine, tyrosine, proline and tryptophan catabolism	4	137	0.00979761	0.0425664	0.466234	4	53	0.0044961	9606	Homo sapiens	AMDHD1;uroc1;zgc:92040;ftcd		R-HSA-8955817;R-HSA-70903;R-HSA-70920;R-HSA-70906
R-HSA-5579017	Defective CYP11B1 causes Adrenal hyperplasia 4 (AH4)	1	5	0.000357577	0.0464527	0.466234	1	1	8.4832e-05	9606	Homo sapiens	cyp11c1		R-HSA-5580292
R-HSA-549127	Organic cation transport	2	39	0.0027891	0.0537117	0.466234	2	9	0.000763488	9606	Homo sapiens	slc22a21;slc22a4		R-HSA-549241;R-HSA-549297
R-HSA-427589	Type II Na+/Pi cotransporters	1	6	0.000429092	0.055483	0.466234	1	2	0.000169664	9606	Homo sapiens	slc34a1a		R-HSA-427656
R-HSA-5619102	SLC transporter disorders	4	151	0.0107988	0.0568988	0.466234	4	66	0.00559891	9606	Homo sapiens	slc5a2;slc22a21;slc34a1a;slc7a7		R-HSA-5651685;R-HSA-5658163;R-HSA-5660910;R-HSA-5625674
R-HSA-3296482	Defects in vitamin and cofactor metabolism	2	42	0.00300365	0.0611713	0.466234	2	22	0.0018663	9606	Homo sapiens	cubn;amn		R-HSA-3296462;R-HSA-3296477
R-HSA-8964043	Plasma lipoprotein clearance	2	42	0.00300365	0.0611713	0.466234	2	35	0.00296912	9606	Homo sapiens	cubn;amn		R-HSA-264848;R-HSA-264834
R-HSA-166665	Terminal pathway of complement	1	8	0.000572123	0.0732896	0.466234	4	5	0.00042416	9606	Homo sapiens	c9		R-HSA-173723;R-HSA-173720;R-HSA-173725;R-HSA-173709
R-HSA-196741	Cobalamin (Cbl, vitamin B12) transport and metabolism	2	49	0.00350426	0.0798187	0.466234	2	30	0.00254496	9606	Homo sapiens	cubn;amn		R-HSA-3000137;R-HSA-3000103
R-HSA-9027283	Erythropoietin activates STAT5	1	9	0.000643639	0.0820676	0.466234	3	3	0.000254496	9606	Homo sapiens	epor		R-HSA-9012651;R-HSA-9012650;R-HSA-9012654
R-HSA-159763	Transport of gamma-carboxylated protein precursors from the endoplasmic reticulum to the Golgi apparatus	1	9	0.000643639	0.0820676	0.466234	1	9	0.000763488	9606	Homo sapiens	f2		R-HSA-159843
R-HSA-549132	Organic cation/anion/zwitterion transport	2	51	0.00364729	0.0854344	0.466234	2	12	0.00101798	9606	Homo sapiens	slc22a21;slc22a4		R-HSA-549241;R-HSA-549297
R-HSA-159782	Removal of aminoterminal propeptides from gamma-carboxylated proteins	1	10	0.000715154	0.090763	0.466234	1	9	0.000763488	9606	Homo sapiens	f2		R-HSA-159728
R-HSA-196849	Metabolism of water-soluble vitamins and cofactors	5	252	0.0180219	0.0936503	0.466234	4	140	0.0118765	9606	Homo sapiens	cubn;amn;slc23a1;slc22a13b		R-HSA-8869603;R-HSA-3000137;R-HSA-198870;R-HSA-3000103
R-HSA-196025	Formation of annular gap junctions	1	11	0.00078667	0.0993767	0.466234	2	2	0.000169664	9606	Homo sapiens	dab2		R-HSA-196017;R-HSA-196026
R-HSA-5652227	Fructose biosynthesis	1	11	0.00078667	0.0993767	0.466234	1	2	0.000169664	9606	Homo sapiens	sord		R-HSA-5652195
R-HSA-190873	Gap junction degradation	1	12	0.000858185	0.107909	0.466234	4	4	0.000339328	9606	Homo sapiens	dab2		R-HSA-196017;R-HSA-190519;R-HSA-196026;R-HSA-190829
R-HSA-8866907	Activation of the TFAP2 (AP-2) family of transcription factors	1	12	0.000858185	0.107909	0.466234	1	4	0.000339328	9606	Homo sapiens	cited4a		R-HSA-8864307
R-HSA-9027277	Erythropoietin activates Phospholipase C gamma (PLCG)	1	13	0.0009297	0.116362	0.466234	3	3	0.000254496	9606	Homo sapiens	epor		R-HSA-9027373;R-HSA-9032478;R-HSA-9027425
R-HSA-174362	Transport and synthesis of PAPS	1	13	0.0009297	0.116362	0.466234	1	4	0.000339328	9606	Homo sapiens	slc26a1		R-HSA-427555
R-HSA-381426	Regulation of Insulin-like Growth Factor (IGF) transport and uptake by Insulin-like Growth Factor Binding Proteins (IGFBPs)	3	127	0.00908246	0.121454	0.466234	3	14	0.00118765	9606	Homo sapiens	plg;f2;bmp2b		R-HSA-381461;R-HSA-381446;R-HSA-8952289
R-HSA-75205	Dissolution of Fibrin Clot	1	14	0.00100122	0.124735	0.466234	13	19	0.00161181	9606	Homo sapiens	plg		R-HSA-158722;R-HSA-158784;R-HSA-158721;R-HSA-158982;R-HSA-158756;R-HSA-158766;R-HSA-158925;R-HSA-158893;R-HSA-158747;R-HSA-158744;R-HSA-158942;R-HSA-158750;R-HSA-158941
R-HSA-70688	Proline catabolism	1	14	0.00100122	0.124735	0.466234	1	4	0.000339328	9606	Homo sapiens	zgc:92040		R-HSA-8955817
R-HSA-425561	Sodium/Calcium exchangers	1	15	0.00107273	0.133029	0.466234	1	4	0.000339328	9606	Homo sapiens	slc24a2		R-HSA-425678
R-HSA-159740	Gamma-carboxylation of protein precursors	1	15	0.00107273	0.133029	0.466234	1	9	0.000763488	9606	Homo sapiens	f2		R-HSA-159826
R-HSA-9027276	Erythropoietin activates Phosphoinositide-3-kinase (PI3K)	1	16	0.00114425	0.141245	0.466234	7	7	0.000593824	9606	Homo sapiens	epor		R-HSA-9027273;R-HSA-9027272;R-HSA-9021627;R-HSA-9027275;R-HSA-9027281;R-HSA-9012657;R-HSA-9027280
R-HSA-217271	FMO oxidises nucleophiles	1	16	0.00114425	0.141245	0.466234	1	3	0.000254496	9606	Homo sapiens	fmo5		R-HSA-217258
R-HSA-159854	Gamma-carboxylation, transport, and amino-terminal cleavage of proteins	1	16	0.00114425	0.141245	0.466234	3	27	0.00229046	9606	Homo sapiens	f2		R-HSA-159826;R-HSA-159843;R-HSA-159728
R-HSA-389661	Glyoxylate metabolism and glycine degradation	2	73	0.00522063	0.153562	0.466234	2	23	0.00195114	9606	Homo sapiens	zgc:92040;hoga1		R-HSA-6784423;R-HSA-6784224
R-HSA-913709	O-linked glycosylation of mucins	2	74	0.00529214	0.156871	0.466234	1	17	0.00144214	9606	Homo sapiens	galnt11;galnt14		R-HSA-913675
R-HSA-9027284	Erythropoietin activates RAS	1	18	0.00128728	0.157447	0.466234	8	8	0.000678656	9606	Homo sapiens	epor		R-HSA-9027274;R-HSA-9029149;R-HSA-9029151;R-HSA-9029150;R-HSA-9029155;R-HSA-9024723;R-HSA-9029158;R-HSA-9024726
R-HSA-5607763	CLEC7A (Dectin-1) induces NFAT activation	1	18	0.00128728	0.157447	0.466234	1	6	0.000508992	9606	Homo sapiens	ahcyl1		R-HSA-169683
R-HSA-8849175	Threonine catabolism	1	20	0.00143031	0.173344	0.466234	1	4	0.000339328	9606	Homo sapiens	rida		R-HSA-9014641
R-HSA-196791	Vitamin D (calciferol) metabolism	1	21	0.00150182	0.181181	0.466234	5	19	0.00161181	9606	Homo sapiens	cubn		R-HSA-8963864;R-HSA-209760;R-HSA-350158;R-HSA-350168;R-HSA-350186
R-HSA-5661270	Formation of xylulose-5-phosphate	1	21	0.00150182	0.181181	0.466234	1	6	0.000508992	9606	Homo sapiens	sord		R-HSA-5662471
R-HSA-209905	Catecholamine biosynthesis	1	22	0.00157334	0.188945	0.466234	1	6	0.000508992	9606	Homo sapiens	dbh		R-HSA-209891
R-HSA-194002	Glucocorticoid biosynthesis	1	23	0.00164485	0.196635	0.466234	1	8	0.000678656	9606	Homo sapiens	cyp11c1		R-HSA-193997
R-HSA-5619115	Disorders of transmembrane transporters	4	243	0.0173782	0.201712	0.466234	4	88	0.00746522	9606	Homo sapiens	slc5a2;slc22a21;slc34a1a;slc7a7		R-HSA-5651685;R-HSA-5658163;R-HSA-5660910;R-HSA-5625674
R-HSA-382551	Transport of small molecules	12	960	0.0686548	0.20313	0.466234	13	430	0.0364778	9606	Homo sapiens	cubn;slc26a6;slc5a2;amn;slc5a12;slc20a1a;slc22a21;slc34a1a;slc26a1;slc7a7;slc22a4;slc24a2		R-HSA-427555;R-HSA-264834;R-HSA-425678;R-HSA-429613;R-HSA-427656;R-HSA-549241;R-HSA-379415;R-HSA-427605;R-HSA-427666;R-HSA-264848;R-HSA-549297;R-HSA-189208;R-HSA-8876312
R-HSA-210991	Basigin interactions	1	26	0.0018594	0.219274	0.466234	1	10	0.00084832	9606	Homo sapiens	slc7a7		R-HSA-375131
R-HSA-1296041	Activation of G protein gated Potassium channels	1	27	0.00193092	0.226678	0.466234	1	1	8.4832e-05	9606	Homo sapiens	KCNJ15		R-HSA-1013020
R-HSA-1296059	G protein gated Potassium channels	1	27	0.00193092	0.226678	0.466234	1	1	8.4832e-05	9606	Homo sapiens	KCNJ15		R-HSA-1013020
R-HSA-997272	Inhibition of voltage gated Ca2+ channels via Gbeta/gamma subunits	1	27	0.00193092	0.226678	0.466234	1	1	8.4832e-05	9606	Homo sapiens	KCNJ15		R-HSA-1013020
R-HSA-5652084	Fructose metabolism	1	27	0.00193092	0.226678	0.466234	1	7	0.000593824	9606	Homo sapiens	sord		R-HSA-5652195
R-HSA-189200	Cellular hexose transport	1	28	0.00200243	0.234013	0.466234	2	17	0.00144214	9606	Homo sapiens	slc5a2		R-HSA-189208;R-HSA-429613
R-HSA-200425	Import of palmitoyl-CoA into the mitochondrial matrix	1	28	0.00200243	0.234013	0.466234	1	9	0.000763488	9606	Homo sapiens	slc22a21		R-HSA-165026
R-HSA-174824	Plasma lipoprotein assembly, remodeling, and clearance	2	98	0.00700851	0.239204	0.466234	2	84	0.00712589	9606	Homo sapiens	cubn;amn		R-HSA-264848;R-HSA-264834
R-HSA-140837	Intrinsic Pathway of Fibrin Clot Formation	1	29	0.00207395	0.241279	0.466234	4	20	0.00169664	9606	Homo sapiens	f2		R-HSA-158419;R-HSA-9603302;R-HSA-9015379;R-HSA-158137
R-HSA-201451	Signaling by BMP	1	30	0.00214546	0.248477	0.466234	8	17	0.00144214	9606	Homo sapiens	bmp2b		R-HSA-201475;R-HSA-201443;R-HSA-201810;R-HSA-201457;R-HSA-201648;R-HSA-201476;R-HSA-201821;R-HSA-201453
R-HSA-5218921	VEGFR2 mediated cell proliferation	1	30	0.00214546	0.248477	0.466234	1	12	0.00101798	9606	Homo sapiens	ahcyl1		R-HSA-169683
R-HSA-2046105	Linoleic acid (LA) metabolism	1	32	0.00228849	0.262669	0.466234	2	10	0.00084832	9606	Homo sapiens	elovl5		R-HSA-2046094;R-HSA-2046083
R-HSA-70635	Urea cycle	1	32	0.00228849	0.262669	0.466234	1	8	0.000678656	9606	Homo sapiens	arg1		R-HSA-70569
R-HSA-8939236	RUNX1 regulates transcription of genes involved in differentiation of HSCs	2	106	0.00758063	0.267276	0.466234	3	15	0.00127248	9606	Homo sapiens	lmo1;gata1a		R-HSA-8956568;R-HSA-8956586;R-HSA-8956608
R-HSA-3928663	EPHA-mediated growth cone collapse	1	33	0.00236001	0.269665	0.466234	3	4	0.000339328	9606	Homo sapiens	epha3		R-HSA-3928651;R-HSA-3928602;R-HSA-3928648
R-HSA-445095	Interaction between L1 and Ankyrins	1	33	0.00236001	0.269665	0.466234	2	4	0.000339328	9606	Homo sapiens	sptbn5		R-HSA-392751;R-HSA-373739
R-HSA-9006335	Signaling by Erythropoietin	1	34	0.00243152	0.276595	0.466234	24	24	0.00203597	9606	Homo sapiens	epor		R-HSA-9027273;R-HSA-9027272;R-HSA-9027275;R-HSA-9012651;R-HSA-9012650;R-HSA-9027274;R-HSA-9027373;R-HSA-9012654;R-HSA-9027425;R-HSA-9029155;R-HSA-9029158;R-HSA-9021627;R-HSA-9029149;R-HSA-9006332;R-HSA-9029151;R-HSA-9032478;R-HSA-9029150;R-HSA-9027281;R-HSA-9012657;R-HSA-9027280;R-HSA-9006323;R-HSA-9024723;R-HSA-9006325;R-HSA-9024726
R-HSA-140875	Common Pathway of Fibrin Clot Formation	1	34	0.00243152	0.276595	0.466234	12	29	0.00246013	9606	Homo sapiens	f2		R-HSA-141040;R-HSA-140870;R-HSA-141046;R-HSA-140599;R-HSA-140791;R-HSA-5602080;R-HSA-5578883;R-HSA-140872;R-HSA-140696;R-HSA-140840;R-HSA-140664;R-HSA-140700
R-HSA-1296065	Inwardly rectifying K+ channels	1	34	0.00243152	0.276595	0.466234	1	5	0.00042416	9606	Homo sapiens	KCNJ15		R-HSA-1013020
R-HSA-1592389	Activation of Matrix Metalloproteinases	1	35	0.00250304	0.28346	0.466234	6	27	0.00229046	9606	Homo sapiens	plg		R-HSA-1602488;R-HSA-1604712;R-HSA-1602458;R-HSA-1592316;R-HSA-1592398;R-HSA-1592371
R-HSA-456926	Thrombin signalling through proteinase activated receptors (PARs)	1	35	0.00250304	0.28346	0.466234	1	14	0.00118765	9606	Homo sapiens	f2		R-HSA-114697
R-HSA-1251985	Nuclear signaling by ERBB4	1	35	0.00250304	0.28346	0.466234	1	22	0.0018663	9606	Homo sapiens	cxcl12b		R-HSA-8954199
R-HSA-71291	Metabolism of amino acids and derivatives	8	660	0.0472002	0.292484	0.466234	9	283	0.0240075	9606	Homo sapiens	rida;AMDHD1;arg1;uroc1;dbh;zgc:92040;hoga1;ftcd		R-HSA-6784423;R-HSA-209891;R-HSA-8955817;R-HSA-70903;R-HSA-6784224;R-HSA-9014641;R-HSA-70569;R-HSA-70920;R-HSA-70906
R-HSA-196854	Metabolism of vitamins and cofactors	5	381	0.0272474	0.297121	0.466234	4	201	0.0170512	9606	Homo sapiens	cubn;amn;slc23a1;slc22a13b		R-HSA-8869603;R-HSA-3000137;R-HSA-198870;R-HSA-3000103
R-HSA-5083635	Defective B3GALTL causes Peters-plus syndrome (PpS)	1	39	0.0027891	0.310279	0.466234	1	1	8.4832e-05	9606	Homo sapiens	adamts13		R-HSA-6785565
R-HSA-445355	Smooth Muscle Contraction	1	39	0.0027891	0.310279	0.466234	2	9	0.000763488	9606	Homo sapiens	cav3		R-HSA-5263633;R-HSA-5263628
R-HSA-5173214	O-glycosylation of TSR domain-containing proteins	1	41	0.00293213	0.323313	0.466234	2	2	0.000169664	9606	Homo sapiens	adamts13		R-HSA-5173005;R-HSA-5173192
R-HSA-5628897	TP53 Regulates Metabolic Genes	2	125	0.00893943	0.333679	0.466234	4	34	0.00288429	9606	Homo sapiens	ddit4		R-HSA-5632386;R-HSA-5632738;R-HSA-5632732;R-HSA-5632393
R-HSA-5668914	Diseases of metabolism	3	217	0.0155188	0.340773	0.466234	3	114	0.00967085	9606	Homo sapiens	cubn;amn;cyp11c1		R-HSA-5580292;R-HSA-3296462;R-HSA-3296477
R-HSA-74217	Purine salvage	1	44	0.00314668	0.342406	0.466234	1	11	0.000933152	9606	Homo sapiens	ampd3b		R-HSA-76590
R-HSA-991365	Activation of GABAB receptors	1	45	0.00321819	0.348651	0.466234	1	6	0.000508992	9606	Homo sapiens	KCNJ15		R-HSA-1013020
R-HSA-977444	GABA B receptor activation	1	45	0.00321819	0.348651	0.466234	1	7	0.000593824	9606	Homo sapiens	KCNJ15		R-HSA-1013020
R-HSA-2046106	alpha-linolenic acid (ALA) metabolism	1	45	0.00321819	0.348651	0.466234	2	15	0.00127248	9606	Homo sapiens	elovl5		R-HSA-2046088;R-HSA-2046100
R-HSA-1489509	DAG and IP3 signaling	1	45	0.00321819	0.348651	0.466234	1	19	0.00161181	9606	Homo sapiens	ahcyl1		R-HSA-169683
R-HSA-380108	Chemokine receptors bind chemokines	1	48	0.00343274	0.367035	0.466234	1	18	0.00152698	9606	Homo sapiens	cxcl12b		R-HSA-374214
R-HSA-977606	Regulation of Complement cascade	2	139	0.00994064	0.381554	0.466234	4	42	0.00356295	9606	Homo sapiens	c9;f2		R-HSA-8852580;R-HSA-2530429;R-HSA-2530445;R-HSA-8852716
R-HSA-1474244	Extracellular matrix organization	4	329	0.0235286	0.382046	0.466234	16	318	0.0269766	9606	Homo sapiens	mfap2;plg;bmp2b		R-HSA-1602488;R-HSA-1592314;R-HSA-1602458;R-HSA-2161282;R-HSA-1592316;R-HSA-2129353;R-HSA-2129385;R-HSA-1592371;R-HSA-2396399;R-HSA-1454843;R-HSA-1604712;R-HSA-2328048;R-HSA-1566979;R-HSA-1592398;R-HSA-1592387;R-HSA-2129375
R-HSA-75876	Synthesis of very long-chain fatty acyl-CoAs	1	51	0.00364729	0.384903	0.466234	1	12	0.00101798	9606	Homo sapiens	elovl5		R-HSA-548800
R-HSA-140877	Formation of Fibrin Clot (Clotting Cascade)	1	52	0.0037188	0.390748	0.466234	16	57	0.00483543	9606	Homo sapiens	f2		R-HSA-140870;R-HSA-140872;R-HSA-140840;R-HSA-158419;R-HSA-141040;R-HSA-9603302;R-HSA-141046;R-HSA-140599;R-HSA-140791;R-HSA-5602080;R-HSA-5578883;R-HSA-9015379;R-HSA-140696;R-HSA-140664;R-HSA-158137;R-HSA-140700
R-HSA-190828	Gap junction trafficking	1	52	0.0037188	0.390748	0.466234	4	20	0.00169664	9606	Homo sapiens	dab2		R-HSA-196017;R-HSA-190519;R-HSA-196026;R-HSA-190829
R-HSA-8955332	Carboxyterminal post-translational modifications of tubulin	1	52	0.0037188	0.390748	0.466234	1	6	0.000508992	9606	Homo sapiens	agbl5		R-HSA-8866105
R-HSA-8864260	Transcriptional regulation by the AP-2 (TFAP2) family of transcription factors	1	52	0.0037188	0.390748	0.466234	1	44	0.00373261	9606	Homo sapiens	cited4a		R-HSA-8864307
R-HSA-5683826	Surfactant metabolism	1	53	0.00379032	0.396537	0.466234	1	27	0.00229046	9606	Homo sapiens	slc34a1a		R-HSA-427656
R-HSA-76009	Platelet Aggregation (Plug Formation)	1	53	0.00379032	0.396537	0.466234	1	27	0.00229046	9606	Homo sapiens	f2		R-HSA-429529
R-HSA-3928665	EPH-ephrin mediated repulsion of cells	1	55	0.00393335	0.407952	0.466234	6	9	0.000763488	9606	Homo sapiens	epha3		R-HSA-4093327;R-HSA-3928607;R-HSA-3928604;R-HSA-3928642;R-HSA-3928628;R-HSA-3928660
R-HSA-2046104	alpha-linolenic (omega3) and linoleic (omega6) acid metabolism	1	55	0.00393335	0.407952	0.466234	4	25	0.0021208	9606	Homo sapiens	elovl5		R-HSA-2046094;R-HSA-2046088;R-HSA-2046100;R-HSA-2046083
R-HSA-157858	Gap junction trafficking and regulation	1	56	0.00400486	0.413578	0.466234	4	24	0.00203597	9606	Homo sapiens	dab2		R-HSA-196017;R-HSA-190519;R-HSA-196026;R-HSA-190829
R-HSA-2122947	NOTCH1 Intracellular Domain Regulates Transcription	1	56	0.00400486	0.413578	0.466234	1	16	0.00135731	9606	Homo sapiens	hdac7b		R-HSA-1912388
R-HSA-209776	Amine-derived hormones	1	56	0.00400486	0.413578	0.466234	1	21	0.00178147	9606	Homo sapiens	dbh		R-HSA-209891
R-HSA-197264	Nicotinamide salvaging	1	59	0.00421941	0.430142	0.466234	1	12	0.00101798	9606	Homo sapiens	slc22a13b		R-HSA-8869603
R-HSA-166658	Complement cascade	2	156	0.0111564	0.437651	0.466234	8	71	0.00602307	9606	Homo sapiens	c9;f2		R-HSA-8852580;R-HSA-173723;R-HSA-173720;R-HSA-2530429;R-HSA-2530445;R-HSA-8852716;R-HSA-173725;R-HSA-173709
R-HSA-1236394	Signaling by ERBB4	1	61	0.00436244	0.440926	0.466234	1	37	0.00313879	9606	Homo sapiens	cxcl12b		R-HSA-8954199
R-HSA-977443	GABA receptor activation	1	63	0.00450547	0.451507	0.466234	1	10	0.00084832	9606	Homo sapiens	KCNJ15		R-HSA-1013020
R-HSA-112043	PLC beta mediated events	1	63	0.00450547	0.451507	0.466234	1	23	0.00195114	9606	Homo sapiens	ahcyl1		R-HSA-169683
R-HSA-5578775	Ion homeostasis	1	64	0.00457699	0.456723	0.466234	2	15	0.00127248	9606	Homo sapiens	ahcyl1		R-HSA-169683;R-HSA-5226904
R-HSA-112040	G-protein mediated events	1	64	0.00457699	0.456723	0.466234	1	32	0.00271463	9606	Homo sapiens	ahcyl1		R-HSA-169683
R-HSA-425366	Transport of bile salts and organic acids, metal ions and amine compounds	2	165	0.0118	0.466234	0.466234	2	66	0.00559891	9606	Homo sapiens	slc22a21;slc22a4		R-HSA-549241;R-HSA-549297
R-HSA-9033241	Peroxisomal protein import	1	67	0.00479153	0.472077	0.472077	3	26	0.00220563	9606	Homo sapiens	hao2		R-HSA-9033233;R-HSA-9033235;R-HSA-9033236
R-HSA-8956321	Nucleotide salvage	1	68	0.00486305	0.477099	0.477099	1	21	0.00178147	9606	Homo sapiens	ampd3b		R-HSA-76590
R-HSA-2894858	Signaling by NOTCH1 HD+PEST Domain Mutants in Cancer	1	68	0.00486305	0.477099	0.477099	1	21	0.00178147	9606	Homo sapiens	hdac7b		R-HSA-2220982
R-HSA-2644602	Signaling by NOTCH1 PEST Domain Mutants in Cancer	1	68	0.00486305	0.477099	0.477099	1	21	0.00178147	9606	Homo sapiens	hdac7b		R-HSA-2220982
R-HSA-2644606	Constitutive Signaling by NOTCH1 PEST Domain Mutants	1	68	0.00486305	0.477099	0.477099	1	21	0.00178147	9606	Homo sapiens	hdac7b		R-HSA-2220982
R-HSA-2894862	Constitutive Signaling by NOTCH1 HD+PEST Domain Mutants	1	68	0.00486305	0.477099	0.477099	1	21	0.00178147	9606	Homo sapiens	hdac7b		R-HSA-2220982
R-HSA-352230	Amino acid transport across the plasma membrane	1	68	0.00486305	0.477099	0.477099	1	36	0.00305395	9606	Homo sapiens	slc7a7		R-HSA-379415
R-HSA-2644603	Signaling by NOTCH1 in Cancer	1	68	0.00486305	0.477099	0.477099	1	39	0.00330845	9606	Homo sapiens	hdac7b		R-HSA-2220982
R-HSA-375165	NCAM signaling for neurite out-growth	1	69	0.00493456	0.482073	0.482073	7	23	0.00195114	9606	Homo sapiens	sptbn5		R-HSA-392053;R-HSA-392054;R-HSA-392051;R-HSA-391868;R-HSA-391871;R-HSA-391865;R-HSA-391866
R-HSA-163841	Gamma carboxylation, hypusine formation and arylsulfatase activation	1	69	0.00493456	0.482073	0.482073	3	39	0.00330845	9606	Homo sapiens	f2		R-HSA-159826;R-HSA-159843;R-HSA-159728
R-HSA-186797	Signaling by PDGF	1	69	0.00493456	0.482073	0.482073	1	28	0.0023753	9606	Homo sapiens	plg		R-HSA-382061
R-HSA-196071	Metabolism of steroid hormones	1	69	0.00493456	0.482073	0.482073	1	37	0.00313879	9606	Homo sapiens	cyp11c1		R-HSA-193997
R-HSA-211976	Endogenous sterols	1	71	0.00507759	0.491881	0.491881	1	19	0.00161181	9606	Homo sapiens	cyp11c1		R-HSA-193997
R-HSA-156584	Cytosolic sulfonation of small molecules	1	72	0.00514911	0.496716	0.496716	1	24	0.00203597	9606	Homo sapiens	slc26a1		R-HSA-427555
R-HSA-3906995	Diseases associated with O-glycosylation of proteins	1	76	0.00543517	0.515602	0.515602	1	9	0.000763488	9606	Homo sapiens	adamts13		R-HSA-6785565
R-HSA-8936459	RUNX1 regulates genes involved in megakaryocyte differentiation and platelet function	1	78	0.0055782	0.52478	0.52478	12	33	0.00279946	9606	Homo sapiens	gata1a		R-HSA-8936616;R-HSA-8937016;R-HSA-8937097;R-HSA-8937050;R-HSA-8935740;R-HSA-8937037;R-HSA-8936621;R-HSA-8936481;R-HSA-8936979;R-HSA-8936995;R-HSA-8935731;R-HSA-8936628
R-HSA-75105	Fatty acyl-CoA biosynthesis	1	79	0.00564972	0.529304	0.529304	1	24	0.00203597	9606	Homo sapiens	elovl5		R-HSA-548800
R-HSA-8939902	Regulation of RUNX2 expression and activity	1	80	0.00572123	0.533785	0.533785	1	32	0.00271463	9606	Homo sapiens	bmp2b		R-HSA-9007707
R-HSA-5579029	Metabolic disorders of biological oxidation enzymes	1	82	0.00586426	0.542621	0.542621	1	39	0.00330845	9606	Homo sapiens	cyp11c1		R-HSA-5580292
R-HSA-1980143	Signaling by NOTCH1	1	83	0.00593578	0.546976	0.546976	1	37	0.00313879	9606	Homo sapiens	hdac7b		R-HSA-1912388
R-HSA-383280	Nuclear Receptor transcription pathway	1	84	0.00600729	0.551291	0.551291	1	1	8.4832e-05	9606	Homo sapiens	nr2f1a		R-HSA-376419
R-HSA-196807	Nicotinate metabolism	1	86	0.00615033	0.559797	0.559797	1	29	0.00246013	9606	Homo sapiens	slc22a13b		R-HSA-8869603
R-HSA-1660662	Glycosphingolipid metabolism	1	86	0.00615033	0.559797	0.559797	1	32	0.00271463	9606	Homo sapiens	asah2		R-HSA-1606583
R-HSA-375276	Peptide ligand-binding receptors	2	202	0.0144461	0.574169	0.574169	2	74	0.00627757	9606	Homo sapiens	cxcl12b;f2		R-HSA-389463;R-HSA-374214
R-HSA-390918	Peroxisomal lipid metabolism	1	90	0.00643639	0.576332	0.576332	1	35	0.00296912	9606	Homo sapiens	hao2		R-HSA-6787811
R-HSA-2682334	EPH-Ephrin signaling	1	101	0.00722306	0.618694	0.618694	14	56	0.00475059	9606	Homo sapiens	epha3		R-HSA-3928602;R-HSA-3928607;R-HSA-3928604;R-HSA-3928597;R-HSA-3928628;R-HSA-3928660;R-HSA-3928651;R-HSA-4093327;R-HSA-3928584;R-HSA-3928648;R-HSA-3928591;R-HSA-3928642;R-HSA-3928578;R-HSA-3928646
R-HSA-1296071	Potassium Channels	1	103	0.00736609	0.625931	0.625931	1	17	0.00144214	9606	Homo sapiens	KCNJ15		R-HSA-1013020
R-HSA-983695	Antigen activates B Cell Receptor (BCR) leading to generation of second messengers	1	103	0.00736609	0.625931	0.625931	1	25	0.0021208	9606	Homo sapiens	ahcyl1		R-HSA-169683
R-HSA-422356	Regulation of insulin secretion	1	104	0.0074376	0.629499	0.629499	1	37	0.00313879	9606	Homo sapiens	ahcyl1		R-HSA-169683
R-HSA-111885	Opioid Signalling	1	104	0.0074376	0.629499	0.629499	1	49	0.00415677	9606	Homo sapiens	ahcyl1		R-HSA-169683
R-HSA-6807878	COPI-mediated anterograde transport	1	107	0.00765215	0.639999	0.639999	6	12	0.00101798	9606	Homo sapiens	sptbn5		R-HSA-6807877;R-HSA-6809011;R-HSA-6807875;R-HSA-6809010;R-HSA-6809006;R-HSA-6809003
R-HSA-8957275	Post-translational protein phosphorylation	1	109	0.00779518	0.646835	0.646835	1	1	8.4832e-05	9606	Homo sapiens	bmp2b		R-HSA-8952289
R-HSA-8856825	Cargo recognition for clathrin-mediated endocytosis	1	109	0.00779518	0.646835	0.646835	2	14	0.00118765	9606	Homo sapiens	dab2		R-HSA-8863472;R-HSA-8863471
R-HSA-9006936	Signaling by TGF-beta family members	1	114	0.00815276	0.663367	0.663367	8	107	0.00907703	9606	Homo sapiens	bmp2b		R-HSA-201475;R-HSA-201443;R-HSA-201810;R-HSA-201457;R-HSA-201648;R-HSA-201476;R-HSA-201821;R-HSA-201453
R-HSA-397014	Muscle contraction	2	240	0.0171637	0.667738	0.667738	4	39	0.00330845	9606	Homo sapiens	cav3;ahcyl1		R-HSA-5263633;R-HSA-169683;R-HSA-5226904;R-HSA-5263628
R-HSA-6798695	Neutrophil degranulation	4	480	0.0343274	0.673156	0.673156	6	10	0.00084832	9606	Homo sapiens	ampd3b;arg1;nit2;lrmp		R-HSA-6798739;R-HSA-6800434;R-HSA-6798751;R-HSA-6798749;R-HSA-6798748;R-HSA-6798745
R-HSA-5607764	CLEC7A (Dectin-1) signaling	1	120	0.00858185	0.682193	0.682193	1	45	0.00381744	9606	Homo sapiens	ahcyl1		R-HSA-169683
R-HSA-4420097	VEGFA-VEGFR2 Pathway	1	125	0.00893943	0.697081	0.697081	1	77	0.00653207	9606	Homo sapiens	ahcyl1		R-HSA-169683
R-HSA-202733	Cell surface interactions at the vascular wall	2	256	0.0183079	0.701917	0.701917	2	64	0.00542925	9606	Homo sapiens	f2;slc7a7		R-HSA-141040;R-HSA-375131
R-HSA-2871809	FCERI mediated Ca+2 mobilization	1	129	0.00922549	0.708491	0.708491	1	11	0.000933152	9606	Homo sapiens	ahcyl1		R-HSA-169683
R-HSA-2029485	Role of phospholipids in phagocytosis	1	129	0.00922549	0.708491	0.708491	1	12	0.00101798	9606	Homo sapiens	ahcyl1		R-HSA-169683
R-HSA-373760	L1CAM interactions	1	130	0.009297	0.711276	0.711276	2	54	0.00458093	9606	Homo sapiens	sptbn5		R-HSA-392751;R-HSA-373739
R-HSA-8878171	Transcriptional regulation by RUNX1	2	261	0.0186655	0.711988	0.711988	15	132	0.0111978	9606	Homo sapiens	lmo1;gata1a		R-HSA-8936616;R-HSA-8937097;R-HSA-8956586;R-HSA-8937037;R-HSA-8936621;R-HSA-8956608;R-HSA-8936481;R-HSA-8936995;R-HSA-8937016;R-HSA-8956568;R-HSA-8937050;R-HSA-8935740;R-HSA-8936979;R-HSA-8935731;R-HSA-8936628
R-HSA-9609507	Protein localization	1	133	0.00951155	0.719475	0.719475	3	40	0.00339328	9606	Homo sapiens	hao2		R-HSA-9033233;R-HSA-9033235;R-HSA-9033236
R-HSA-194138	Signaling by VEGF	1	134	0.00958307	0.722156	0.722156	1	83	0.00704106	9606	Homo sapiens	ahcyl1		R-HSA-169683
R-HSA-114608	Platelet degranulation	1	137	0.00979761	0.730047	0.730047	1	11	0.000933152	9606	Homo sapiens	plg		R-HSA-481007
R-HSA-163685	Integration of energy metabolism	1	143	0.0102267	0.745169	0.745169	1	65	0.00551408	9606	Homo sapiens	ahcyl1		R-HSA-169683
R-HSA-76005	Response to elevated platelet cytosolic Ca2+	1	144	0.0102982	0.747606	0.747606	1	14	0.00118765	9606	Homo sapiens	plg		R-HSA-481007
R-HSA-351202	Metabolism of polyamines	1	144	0.0102982	0.747606	0.747606	1	38	0.00322362	9606	Homo sapiens	arg1		R-HSA-70569
R-HSA-8878166	Transcriptional regulation by RUNX2	1	144	0.0102982	0.747606	0.747606	2	84	0.00712589	9606	Homo sapiens	bmp2b		R-HSA-9007707;R-HSA-9008832
R-HSA-1474228	Degradation of the extracellular matrix	1	148	0.0105843	0.757126	0.757126	9	105	0.00890736	9606	Homo sapiens	plg		R-HSA-1602488;R-HSA-1604712;R-HSA-1592314;R-HSA-1602458;R-HSA-1566979;R-HSA-1592316;R-HSA-1592398;R-HSA-1592371;R-HSA-1454843
R-HSA-9018519	Estrogen-dependent gene expression	1	153	0.0109419	0.768526	0.768526	1	66	0.00559891	9606	Homo sapiens	cxcl12b		R-HSA-8954199
R-HSA-76002	Platelet activation, signaling and aggregation	2	293	0.020954	0.769919	0.769919	3	114	0.00967085	9606	Homo sapiens	plg;f2		R-HSA-481007;R-HSA-114697;R-HSA-429529
R-HSA-8856828	Clathrin-mediated endocytosis	1	155	0.0110849	0.772936	0.772936	17	34	0.00288429	9606	Homo sapiens	dab2		R-HSA-8868071;R-HSA-8868230;R-HSA-8863471;R-HSA-8867756;R-HSA-8868236;R-HSA-8868651;R-HSA-8867754;R-HSA-8868072;R-HSA-8868648;R-HSA-8868661;R-HSA-8868660;R-HSA-8868659;R-HSA-8868658;R-HSA-8863472;R-HSA-8869438;R-HSA-8871194;R-HSA-8871193
R-HSA-428157	Sphingolipid metabolism	1	157	0.0112279	0.777262	0.777262	1	62	0.00525959	9606	Homo sapiens	asah2		R-HSA-1606583
R-HSA-8978868	Fatty acid metabolism	3	429	0.0306801	0.777996	0.777996	7	217	0.0184086	9606	Homo sapiens	slc22a21;elovl5;hao2		R-HSA-165026;R-HSA-2046094;R-HSA-6787811;R-HSA-2046088;R-HSA-548800;R-HSA-2046100;R-HSA-2046083
R-HSA-211945	Phase I - Functionalization of compounds	2	300	0.0214546	0.781166	0.781166	2	99	0.00839837	9606	Homo sapiens	cyp11c1;fmo5		R-HSA-217258;R-HSA-193997
R-HSA-8939211	ESR-mediated signaling	1	160	0.0114425	0.783599	0.783599	1	72	0.00610791	9606	Homo sapiens	cxcl12b		R-HSA-8954199
R-HSA-199977	ER to Golgi Anterograde Transport	1	164	0.0117285	0.79177	0.79177	6	39	0.00330845	9606	Homo sapiens	sptbn5		R-HSA-6807877;R-HSA-6809011;R-HSA-6807875;R-HSA-6809010;R-HSA-6809006;R-HSA-6809003
R-HSA-112314	Neurotransmitter receptors and postsynaptic signal transmission	1	173	0.0123722	0.809054	0.809054	1	58	0.00492026	9606	Homo sapiens	KCNJ15		R-HSA-1013020
R-HSA-8957322	Metabolism of steroids	2	321	0.0229564	0.812081	0.812081	6	234	0.0198507	9606	Homo sapiens	cubn;cyp11c1		R-HSA-8963864;R-HSA-209760;R-HSA-350158;R-HSA-350168;R-HSA-193997;R-HSA-350186
R-HSA-5576891	Cardiac conduction	1	175	0.0125152	0.812696	0.812696	2	26	0.00220563	9606	Homo sapiens	ahcyl1		R-HSA-169683;R-HSA-5226904
R-HSA-1630316	Glycosaminoglycan metabolism	1	182	0.0130158	0.824912	0.824912	1	82	0.00695623	9606	Homo sapiens	slc26a1		R-HSA-427555
R-HSA-211897	Cytochrome P450 - arranged by substrate type	1	186	0.0133019	0.831534	0.831534	1	62	0.00525959	9606	Homo sapiens	cyp11c1		R-HSA-193997
R-HSA-983705	Signaling by the B Cell Receptor (BCR)	1	190	0.0135879	0.837907	0.837907	1	43	0.00364778	9606	Homo sapiens	ahcyl1		R-HSA-169683
R-HSA-2029480	Fcgamma receptor (FCGR) dependent phagocytosis	1	193	0.0138025	0.842529	0.842529	1	42	0.00356295	9606	Homo sapiens	ahcyl1		R-HSA-169683
R-HSA-983231	Factors involved in megakaryocyte development and platelet production	1	194	0.013874	0.844041	0.844041	1	43	0.00364778	9606	Homo sapiens	gata1a		R-HSA-996755
R-HSA-3781865	Diseases of glycosylation	1	194	0.013874	0.844041	0.844041	1	77	0.00653207	9606	Homo sapiens	adamts13		R-HSA-6785565
R-HSA-5621481	C-type lectin receptors (CLRs)	1	202	0.0144461	0.855626	0.855626	1	68	0.00576858	9606	Homo sapiens	ahcyl1		R-HSA-169683
R-HSA-9006934	Signaling by Receptor Tyrosine Kinases	3	518	0.037045	0.873875	0.873875	3	631	0.053529	9606	Homo sapiens	cxcl12b;plg;ahcyl1		R-HSA-169683;R-HSA-382061;R-HSA-8954199
R-HSA-948021	Transport to the Golgi and subsequent modification	1	219	0.0156619	0.877484	0.877484	6	60	0.00508992	9606	Homo sapiens	sptbn5		R-HSA-6807877;R-HSA-6809011;R-HSA-6807875;R-HSA-6809010;R-HSA-6809006;R-HSA-6809003
R-HSA-9006931	Signaling by Nuclear Receptors	1	230	0.0164485	0.889843	0.889843	1	93	0.00788938	9606	Homo sapiens	cxcl12b		R-HSA-8954199
R-HSA-2454202	Fc epsilon receptor (FCERI) signaling	1	234	0.0167346	0.894023	0.894023	1	63	0.00534442	9606	Homo sapiens	ahcyl1		R-HSA-169683
R-HSA-376176	Signaling by ROBO receptors	1	235	0.0168061	0.895044	0.895044	1	60	0.00508992	9606	Homo sapiens	cxcl12b		R-HSA-8986258
R-HSA-211859	Biological oxidations	3	547	0.0391189	0.896121	0.896121	3	186	0.0157788	9606	Homo sapiens	slc26a1;cyp11c1;fmo5		R-HSA-427555;R-HSA-217258;R-HSA-193997
R-HSA-71387	Metabolism of carbohydrates	2	413	0.0295359	0.906378	0.906378	3	213	0.0180692	9606	Homo sapiens	sord;slc26a1		R-HSA-5662471;R-HSA-427555;R-HSA-5652195
R-HSA-15869	Metabolism of nucleotides	1	254	0.0181649	0.912677	0.912677	1	135	0.0114523	9606	Homo sapiens	ampd3b		R-HSA-76590
R-HSA-157118	Signaling by NOTCH	1	257	0.0183795	0.915179	0.915179	1	152	0.0128945	9606	Homo sapiens	hdac7b		R-HSA-1912388
R-HSA-156580	Phase II - Conjugation of compounds	1	258	0.018451	0.915997	0.915997	1	70	0.00593824	9606	Homo sapiens	slc26a1		R-HSA-427555
R-HSA-422475	Axon guidance	3	583	0.0416935	0.918838	0.918838	24	297	0.0251951	9606	Homo sapiens	cxcl12b;epha3;sptbn5		R-HSA-3928602;R-HSA-3928607;R-HSA-3928604;R-HSA-392751;R-HSA-3928597;R-HSA-373739;R-HSA-3928628;R-HSA-3928660;R-HSA-3928651;R-HSA-392053;R-HSA-4093327;R-HSA-3928584;R-HSA-3928648;R-HSA-392054;R-HSA-3928591;R-HSA-392051;R-HSA-3928642;R-HSA-3928578;R-HSA-391868;R-HSA-391871;R-HSA-8986258;R-HSA-391865;R-HSA-3928646;R-HSA-391866
R-HSA-373076	Class A/1 (Rhodopsin-like receptors)	2	438	0.0313238	0.923069	0.923069	2	146	0.0123855	9606	Homo sapiens	cxcl12b;f2		R-HSA-389463;R-HSA-374214
R-HSA-5673001	RAF/MAP kinase cascade	1	273	0.0195237	0.927367	0.927367	1	39	0.00330845	9606	Homo sapiens	sptbn5		R-HSA-5672965
R-HSA-416476	G alpha (q) signalling events	1	274	0.0195952	0.928068	0.928068	3	29	0.00246013	9606	Homo sapiens	f2		R-HSA-749448;R-HSA-749452;R-HSA-379048
R-HSA-5684996	MAPK1/MAPK3 signaling	1	280	0.0200243	0.932137	0.932137	1	46	0.00390227	9606	Homo sapiens	sptbn5		R-HSA-5672965
R-HSA-112315	Transmission across Chemical Synapses	1	290	0.0207395	0.938416	0.938416	1	110	0.00933152	9606	Homo sapiens	KCNJ15		R-HSA-1013020
R-HSA-3700989	Transcriptional Regulation by TP53	2	486	0.0347565	0.947602	0.947602	4	259	0.0219715	9606	Homo sapiens	ddit4		R-HSA-5632386;R-HSA-5632738;R-HSA-5632732;R-HSA-5632393
R-HSA-109582	Hemostasis	4	812	0.0580705	0.953627	0.953627	34	327	0.0277401	9606	Homo sapiens	gata1a;plg;f2;slc7a7		R-HSA-158722;R-HSA-158784;R-HSA-158721;R-HSA-158982;R-HSA-140870;R-HSA-114697;R-HSA-140872;R-HSA-158925;R-HSA-158419;R-HSA-5578883;R-HSA-158747;R-HSA-158744;R-HSA-9015379;R-HSA-140696;R-HSA-996755;R-HSA-158942;R-HSA-158750;R-HSA-140700;R-HSA-375131;R-HSA-158941;R-HSA-429529;R-HSA-158756;R-HSA-481007;R-HSA-140840;R-HSA-158766;R-HSA-158893;R-HSA-141040;R-HSA-9603302;R-HSA-141046;R-HSA-140599;R-HSA-…
R-HSA-5683057	MAPK family signaling cascades	1	331	0.0236716	0.958671	0.958671	1	86	0.00729555	9606	Homo sapiens	sptbn5		R-HSA-5672965
R-HSA-1643685	Disease	9	1525	0.109061	0.960347	0.960347	9	953	0.0808449	9606	Homo sapiens	cubn;slc5a2;amn;slc22a21;slc34a1a;cyp11c1;adamts13;slc7a7;hdac7b		R-HSA-5580292;R-HSA-5651685;R-HSA-5658163;R-HSA-2220982;R-HSA-5660910;R-HSA-6785565;R-HSA-3296462;R-HSA-3296477;R-HSA-5625674
R-HSA-9006925	Intracellular signaling by second messengers	1	351	0.0251019	0.965992	0.965992	1	105	0.00890736	9606	Homo sapiens	ahcyl1		R-HSA-169683
R-HSA-168249	Innate Immune System	7	1302	0.0931131	0.969217	0.969217	15	651	0.0552257	9606	Homo sapiens	ampd3b;arg1;c9;nit2;lrmp;f2;ahcyl1		R-HSA-8852580;R-HSA-2530445;R-HSA-8852716;R-HSA-173709;R-HSA-169683;R-HSA-6798739;R-HSA-6800434;R-HSA-6798751;R-HSA-173723;R-HSA-173720;R-HSA-6798749;R-HSA-2530429;R-HSA-6798748;R-HSA-6798745;R-HSA-173725
R-HSA-418594	G alpha (i) signalling events	2	557	0.0398341	0.970748	0.970748	4	147	0.0124703	9606	Homo sapiens	cxcl12b;ahcyl1		R-HSA-169683;R-HSA-749454;R-HSA-749456;R-HSA-380073
R-HSA-446203	Asparagine N-linked glycosylation	1	421	0.030108	0.982852	0.982852	6	143	0.012131	9606	Homo sapiens	sptbn5		R-HSA-6807877;R-HSA-6809011;R-HSA-6807875;R-HSA-6809010;R-HSA-6809006;R-HSA-6809003
R-HSA-500792	GPCR ligand binding	2	629	0.0449832	0.984053	0.984053	2	173	0.0146759	9606	Homo sapiens	cxcl12b;f2		R-HSA-389463;R-HSA-374214
R-HSA-112316	Neuronal System	1	436	0.0311807	0.985199	0.985199	1	163	0.0138276	9606	Homo sapiens	KCNJ15		R-HSA-1013020
R-HSA-597592	Post-translational protein modification	8	1591	0.113781	0.987579	0.987579	16	521	0.0441975	9606	Homo sapiens	large2;agbl5;galnt11;galnt14;f2;bmp2b;adamts13;sptbn5		R-HSA-159843;R-HSA-5617143;R-HSA-6807877;R-HSA-5173005;R-HSA-6807875;R-HSA-913675;R-HSA-5173192;R-HSA-5617138;R-HSA-8952289;R-HSA-6809006;R-HSA-6809003;R-HSA-159826;R-HSA-159728;R-HSA-6809011;R-HSA-6809010;R-HSA-8866105
R-HSA-199991	Membrane Trafficking	2	661	0.0472717	0.987876	0.987876	27	218	0.0184934	9606	Homo sapiens	dab2;sptbn5		R-HSA-8868230;R-HSA-6809006;R-HSA-8868236;R-HSA-6809003;R-HSA-6809011;R-HSA-6809010;R-HSA-8871194;R-HSA-8871193;R-HSA-8868071;R-HSA-6807877;R-HSA-6807875;R-HSA-8863471;R-HSA-8867756;R-HSA-8868651;R-HSA-8867754;R-HSA-190829;R-HSA-8868072;R-HSA-8868648;R-HSA-8868661;R-HSA-196017;R-HSA-8868660;R-HSA-8868659;R-HSA-190519;R-HSA-8868658;R-HSA-8863472;R-HSA-196026;R-HSA-8869438
R-HSA-212436	Generic Transcription Pathway	7	1454	0.103983	0.987938	0.987938	23	726	0.0615881	9606	Homo sapiens	lmo1;gata1a;ddit4;nr2f1a;cited4a;bmp2b		R-HSA-8936616;R-HSA-8937097;R-HSA-8956586;R-HSA-8937037;R-HSA-8936621;R-HSA-376419;R-HSA-8956608;R-HSA-8936481;R-HSA-5632732;R-HSA-9008832;R-HSA-8936995;R-HSA-8937016;R-HSA-8956568;R-HSA-8937050;R-HSA-9007707;R-HSA-8935740;R-HSA-8864307;R-HSA-5632386;R-HSA-5632738;R-HSA-8936979;R-HSA-8935731;R-HSA-8936628;R-HSA-5632393
R-HSA-5663202	Diseases of signal transduction	1	475	0.0339698	0.989913	0.989913	1	297	0.0251951	9606	Homo sapiens	hdac7b		R-HSA-2220982
R-HSA-1430728	Metabolism	23	3585	0.256383	0.991565	0.991565	33	2184	0.185273	9606	Homo sapiens	rida;amn;uroc1;slc22a21;elovl5;dbh;hao2;cyp11c1;ahcyl1;slc22a13b;cubn;ampd3b;AMDHD1;asah2;arg1;slc23a1;sord;slc26a1;zgc:92040;fmo5;hoga1;ftcd		R-HSA-6784423;R-HSA-6787811;R-HSA-6784224;R-HSA-548800;R-HSA-70920;R-HSA-3000103;R-HSA-2046100;R-HSA-350158;R-HSA-193997;R-HSA-8963864;R-HSA-2046094;R-HSA-5662471;R-HSA-169683;R-HSA-198870;R-HSA-2046088;R-HSA-2046083;R-HSA-350168;R-HSA-209891;R-HSA-165026;R-HSA-8955817;R-HSA-209760;R-HSA-8869603;R-HSA-3000137;R-HSA-427555;R-HSA-70569;R-HSA-217258;R-HSA-1606583;R-HSA-76590;R-HSA-350186;R-HSA-56521…
R-HSA-556833	Metabolism of lipids	6	1433	0.102482	0.994851	0.994851	14	942	0.0799118	9606	Homo sapiens	cubn;asah2;slc22a21;elovl5;hao2;cyp11c1		R-HSA-165026;R-HSA-209760;R-HSA-6787811;R-HSA-548800;R-HSA-2046100;R-HSA-350158;R-HSA-1606583;R-HSA-193997;R-HSA-350186;R-HSA-8963864;R-HSA-2046094;R-HSA-2046088;R-HSA-2046083;R-HSA-350168
R-HSA-73857	RNA Polymerase II Transcription	7	1593	0.113924	0.995187	0.995187	23	787	0.0667628	9606	Homo sapiens	lmo1;gata1a;ddit4;nr2f1a;cited4a;bmp2b		R-HSA-8936616;R-HSA-8937097;R-HSA-8956586;R-HSA-8937037;R-HSA-8936621;R-HSA-376419;R-HSA-8956608;R-HSA-8936481;R-HSA-5632732;R-HSA-9008832;R-HSA-8936995;R-HSA-8937016;R-HSA-8956568;R-HSA-8937050;R-HSA-9007707;R-HSA-8935740;R-HSA-8864307;R-HSA-5632386;R-HSA-5632738;R-HSA-8936979;R-HSA-8935731;R-HSA-8936628;R-HSA-5632393
R-HSA-5653656	Vesicle-mediated transport	2	820	0.0586426	0.997	0.997	27	251	0.0212928	9606	Homo sapiens	dab2;sptbn5		R-HSA-8868230;R-HSA-6809006;R-HSA-8868236;R-HSA-6809003;R-HSA-6809011;R-HSA-6809010;R-HSA-8871194;R-HSA-8871193;R-HSA-8868071;R-HSA-6807877;R-HSA-6807875;R-HSA-8863471;R-HSA-8867756;R-HSA-8868651;R-HSA-8867754;R-HSA-190829;R-HSA-8868072;R-HSA-8868648;R-HSA-8868661;R-HSA-196017;R-HSA-8868660;R-HSA-8868659;R-HSA-190519;R-HSA-8868658;R-HSA-8863472;R-HSA-196026;R-HSA-8869438
R-HSA-74160	Gene expression (Transcription)	7	1751	0.125223	0.998411	0.998411	23	898	0.0761792	9606	Homo sapiens	lmo1;gata1a;ddit4;nr2f1a;cited4a;bmp2b		R-HSA-8936616;R-HSA-8937097;R-HSA-8956586;R-HSA-8937037;R-HSA-8936621;R-HSA-376419;R-HSA-8956608;R-HSA-8936481;R-HSA-5632732;R-HSA-9008832;R-HSA-8936995;R-HSA-8937016;R-HSA-8956568;R-HSA-8937050;R-HSA-9007707;R-HSA-8935740;R-HSA-8864307;R-HSA-5632386;R-HSA-5632738;R-HSA-8936979;R-HSA-8935731;R-HSA-8936628;R-HSA-5632393
R-HSA-1266738	Developmental Biology	3	1177	0.0841736	0.999271	0.999271	24	484	0.0410587	9606	Homo sapiens	cxcl12b;epha3;sptbn5		R-HSA-3928602;R-HSA-3928607;R-HSA-3928604;R-HSA-392751;R-HSA-3928597;R-HSA-373739;R-HSA-3928628;R-HSA-3928660;R-HSA-3928651;R-HSA-392053;R-HSA-4093327;R-HSA-3928584;R-HSA-3928648;R-HSA-392054;R-HSA-3928591;R-HSA-392051;R-HSA-3928642;R-HSA-3928578;R-HSA-391868;R-HSA-391871;R-HSA-8986258;R-HSA-391865;R-HSA-3928646;R-HSA-391866
R-HSA-392499	Metabolism of proteins	10	2342	0.167489	0.999427	0.999427	19	883	0.0749067	9606	Homo sapiens	large2;agbl5;galnt11;galnt14;slc34a1a;plg;f2;bmp2b;adamts13;sptbn5		R-HSA-159843;R-HSA-5617143;R-HSA-6807877;R-HSA-381446;R-HSA-5173005;R-HSA-6807875;R-HSA-913675;R-HSA-5173192;R-HSA-5617138;R-HSA-8952289;R-HSA-6809006;R-HSA-6809003;R-HSA-427656;R-HSA-381461;R-HSA-159826;R-HSA-159728;R-HSA-6809011;R-HSA-6809010;R-HSA-8866105
R-HSA-388396	GPCR downstream signalling	3	1344	0.0961167	0.999834	0.999834	7	215	0.0182389	9606	Homo sapiens	cxcl12b;f2;ahcyl1		R-HSA-169683;R-HSA-749448;R-HSA-749454;R-HSA-749452;R-HSA-749456;R-HSA-380073;R-HSA-379048
R-HSA-372790	Signaling by GPCR	3	1447	0.103483	0.999935	0.999935	9	388	0.0329148	9606	Homo sapiens	cxcl12b;f2;ahcyl1		R-HSA-169683;R-HSA-389463;R-HSA-749448;R-HSA-374214;R-HSA-749454;R-HSA-749452;R-HSA-749456;R-HSA-380073;R-HSA-379048
R-HSA-1280218	Adaptive Immune System	1	997	0.0713009	0.999947	0.999947	1	261	0.0221412	9606	Homo sapiens	ahcyl1		R-HSA-169683
R-HSA-168256	Immune System	7	2641	0.188872	0.999999	0.999999	15	1493	0.126654	9606	Homo sapiens	ampd3b;arg1;c9;nit2;lrmp;f2;ahcyl1		R-HSA-8852580;R-HSA-2530445;R-HSA-8852716;R-HSA-173709;R-HSA-169683;R-HSA-6798739;R-HSA-6800434;R-HSA-6798751;R-HSA-173723;R-HSA-173720;R-HSA-6798749;R-HSA-2530429;R-HSA-6798748;R-HSA-6798745;R-HSA-173725
R-HSA-162582	Signal Transduction	8	3158	0.225846	1	1	45	2130	0.180692	9606	Homo sapiens	cxcl12b;epor;plg;f2;ahcyl1;bmp2b;sptbn5;hdac7b		R-HSA-201475;R-HSA-9027273;R-HSA-9027272;R-HSA-9027275;R-HSA-749448;R-HSA-374214;R-HSA-9027274;R-HSA-749454;R-HSA-749452;R-HSA-201476;R-HSA-201810;R-HSA-169683;R-HSA-389463;R-HSA-5672965;R-HSA-9029149;R-HSA-9029151;R-HSA-9032478;R-HSA-9029150;R-HSA-9027281;R-HSA-1912388;R-HSA-9027280;R-HSA-9024723;R-HSA-749456;R-HSA-201821;R-HSA-8954199;R-HSA-9024726;R-HSA-201443;R-HSA-9012651;R-HSA-9012650;R-HSA…

## Sheet: SI Table 10b
Supporting Information Table S10b: Enrichment of Reactome pathways represented by differentially expressed genes
Day 5 1000 ug/L BPA
Compilation of Reactome (v66) pathways (for all differentially expressed genes)
Pathways were considered to be enriched when p-values adjusted for False Dicovery Rate (FDR) for multiple-testing were < 0.1
Pathway identifier	Pathway name	#Entities found	#Entities total	Entities ratio	Entities pValue	Entities FDR	#Reactions found	#Reactions total	Reactions ratio	log2FoldChange	Species identifier	Species name	Submitted entities found	Mapped entities	Found reaction identifiers
R-HSA-5635851	GLI proteins bind promoters of Hh responsive genes to promote transcription	4	8	0.000572123	8.36129e-05	0.0535122	4	4	0.000339328	-1.69015	9606	Homo sapiens	hhip;ptch2;gli1		R-HSA-5635846;R-HSA-5635853;R-HSA-5635848;R-HSA-5635850
R-HSA-8852405	Signaling by MST1	3	8	0.000572123	0.00153492	0.456097	1	4	0.000339328	-2.29772	9606	Homo sapiens	spint1a;hpn;spint2		R-HSA-6800198
R-HSA-6806942	MET Receptor Activation	3	9	0.000643639	0.0021413	0.456097	2	5	0.00042416	-2.29772	9606	Homo sapiens	spint1a;hpn;spint2		R-HSA-6800299;R-HSA-6800200
R-HSA-3000157	Laminin interactions	4	31	0.00221698	0.011476	0.707381	12	15	0.00127248	-2.6397	9606	Homo sapiens	col4a5;nid2a;lamc3;lamc2		R-HSA-2426676;R-HSA-2328145;R-HSA-216048;R-HSA-3787997;R-HSA-2426450;R-HSA-2396083;R-HSA-4084505;R-HSA-3907292;R-HSA-2426530;R-HSA-2327803;R-HSA-4084501;R-HSA-349626
R-HSA-427652	Sodium-coupled phosphate cotransporters	2	8	0.000572123	0.021239	0.707381	2	3	0.000254496	-6.73369	9606	Homo sapiens	slc20a1a;slc34a1a		R-HSA-427605;R-HSA-427656
R-HSA-9025106	Biosynthesis of DPAn-6 SPMs	2	8	0.000572123	0.021239	0.707381	2	3	0.000254496	-2.32393	9606	Homo sapiens	alox12		R-HSA-9025152;R-HSA-9025957
R-HSA-2129379	Molecules associated with elastic fibres	4	38	0.00271759	0.0223281	0.707381	6	10	0.00084832	-2.24461	9606	Homo sapiens	mfap2;bmp2b;itgb6		R-HSA-2161282;R-HSA-2328048;R-HSA-2396029;R-HSA-2396399;R-HSA-1592387;R-HSA-2395320
R-HSA-190241	FGFR2 ligand binding and activation	3	26	0.0018594	0.0366522	0.707381	5	5	0.00042416	-4.48454	9606	Homo sapiens	fgf4;fgf10a;fgfbp1b		R-HSA-5656070;R-HSA-190258;R-HSA-190260;R-HSA-190408;R-HSA-190413
R-HSA-1566948	Elastic fibre formation	4	46	0.00328971	0.0405028	0.707381	10	17	0.00144214	-2.24461	9606	Homo sapiens	mfap2;bmp2b;itgb6		R-HSA-2161282;R-HSA-2328048;R-HSA-2328037;R-HSA-2396029;R-HSA-2129353;R-HSA-2129385;R-HSA-2396399;R-HSA-1592387;R-HSA-2395320;R-HSA-2129375
R-HSA-5632684	Hedgehog 'on' state	6	92	0.00657942	0.0450748	0.707381	15	37	0.00313879	-1.2767	9606	Homo sapiens	hhip;ptch2;gli1;psme4a		R-HSA-5635861;R-HSA-5635860;R-HSA-5635859;R-HSA-5635868;R-HSA-5635864;R-HSA-445448;R-HSA-5635845;R-HSA-5635846;R-HSA-5635841;R-HSA-5610723;R-HSA-5635843;R-HSA-5635842;R-HSA-5635853;R-HSA-5635848;R-HSA-5635850
R-HSA-5358351	Signaling by Hedgehog	9	168	0.0120146	0.0471722	0.707381	31	82	0.00695623	-1.80651	9606	Homo sapiens	hhip;ptch2;shha;TUBB4B;gli1;psme4a		R-HSA-5635861;R-HSA-5362448;R-HSA-5635860;R-HSA-5362386;R-HSA-5635859;R-HSA-5635868;R-HSA-5635864;R-HSA-445448;R-HSA-5610757;R-HSA-5635845;R-HSA-5358336;R-HSA-5617412;R-HSA-5610758;R-HSA-5635846;R-HSA-5635841;R-HSA-5358340;R-HSA-5617408;R-HSA-5635843;R-HSA-5610754;R-HSA-5635842;R-HSA-5635853;R-HSA-5610767;R-HSA-5610766;R-HSA-5610760;R-HSA-5635848;R-HSA-5635850;R-HSA-5610741;R-HSA-5610742;R-HSA-56…
R-HSA-190377	FGFR2b ligand binding and activation	2	14	0.00100122	0.0584071	0.707381	3	3	0.000254496	-4.9839	9606	Homo sapiens	fgf10a;fgfbp1b		R-HSA-5656070;R-HSA-190260;R-HSA-190408
R-HSA-75205	Dissolution of Fibrin Clot	2	14	0.00100122	0.0584071	0.707381	16	19	0.00161181	-3.52375	9606	Homo sapiens	serpine2;plg		R-HSA-158722;R-HSA-158784;R-HSA-158721;R-HSA-158982;R-HSA-158756;R-HSA-158795;R-HSA-158766;R-HSA-158925;R-HSA-158893;R-HSA-158800;R-HSA-158747;R-HSA-158744;R-HSA-158942;R-HSA-158750;R-HSA-158941;R-HSA-159005
R-HSA-5658623	FGFRL1 modulation of FGFR1 signaling	2	14	0.00100122	0.0584071	0.707381	1	2	0.000169664	-3.43902	9606	Homo sapiens	fgf4;fgf10a		R-HSA-5654511
R-HSA-2214320	Anchoring fibril formation	2	15	0.00107273	0.065867	0.707381	1	4	0.000339328	-3.64997	9606	Homo sapiens	col4a5;lamc2		R-HSA-2396234
R-HSA-77305	Beta oxidation of palmitoyl-CoA to myristoyl-CoA	2	16	0.00114425	0.073624	0.707381	4	4	0.000339328	0.548187	9606	Homo sapiens	hadhb;acadvl		R-HSA-77299;R-HSA-77301;R-HSA-77303;R-HSA-77304
R-HSA-1592389	Activation of Matrix Metalloproteinases	3	35	0.00250304	0.0748468	0.707381	9	27	0.00229046	-2.82936	9606	Homo sapiens	spock3;plg;ctsla		R-HSA-1602488;R-HSA-1604712;R-HSA-1604360;R-HSA-1592362;R-HSA-1602458;R-HSA-1592316;R-HSA-1592398;R-HSA-1604752;R-HSA-1592371
R-HSA-210745	Regulation of gene expression in beta cells	3	35	0.00250304	0.0748468	0.707381	2	12	0.00101798	-2.15165	9606	Homo sapiens	foxa3;myl7		R-HSA-211346;R-HSA-211482
R-HSA-5626467	RHO GTPases activate IQGAPs	3	36	0.00257455	0.0798668	0.707381	2	5	0.00042416	-2.02929	9606	Homo sapiens	cdh1;TUBB4B		R-HSA-5672304;R-HSA-5672329
R-HSA-5658208	Defective SLC5A2 causes renal glucosuria (GLYS1)	1	3	0.000214546	0.0798816	0.707381	1	1	8.4832e-05	-8.50836	9606	Homo sapiens	slc5a2		R-HSA-5658163
R-HSA-5619107	Defective TPR may confer susceptibility towards thyroid papillary carcinoma (TPC)	1	3	0.000214546	0.0798816	0.707381	1	1	8.4832e-05	0.694976	9606	Homo sapiens	myl7		R-HSA-5661474
R-HSA-5619073	Defective GCK causes maturity-onset diabetes of the young 2 (MODY2)	1	3	0.000214546	0.0798816	0.707381	1	1	8.4832e-05	0.694976	9606	Homo sapiens	myl7		R-HSA-5621918
R-HSA-5619053	Defective SLC22A5 causes systemic primary carnitine deficiency (CDSP)	1	3	0.000214546	0.0798816	0.707381	1	1	8.4832e-05	-5.90603	9606	Homo sapiens	slc22a21		R-HSA-5625674
R-HSA-5339700	TCF7L2 mutants don't bind CTBP	1	3	0.000214546	0.0798816	0.707381	1	1	8.4832e-05	-1.2062	9606	Homo sapiens	tcf7l2		R-HSA-5334052
R-HSA-5619040	Defective SLC34A1 causes hypophosphatemic nephrolithiasis/osteoporosis 1 (NPHLOP1)	1	3	0.000214546	0.0798816	0.707381	1	1	8.4832e-05	-8.2324	9606	Homo sapiens	slc34a1a		R-HSA-5651685
R-HSA-8942233	Intestinal infectious diseases	1	3	0.000214546	0.0798816	0.707381	1	1	8.4832e-05	-9.44803	9606	Homo sapiens	star		R-HSA-8936356
R-HSA-5365859	RA biosynthesis pathway	3	39	0.0027891	0.095765	0.707381	4	11	0.000933152	-2.13466	9606	Homo sapiens	dhrs3a;rbp5;rdh10a		R-HSA-5622134;R-HSA-5362518;R-HSA-5362525;R-HSA-5419165
R-HSA-6806834	Signaling by MET	5	87	0.00622184	0.0970146	0.707381	3	49	0.00415677	-2.73861	9606	Homo sapiens	spint1a;lamc3;hpn;spint2;lamc2		R-HSA-8874079;R-HSA-6800299;R-HSA-6800200
R-HSA-416700	Other semaphorin interactions	2	19	0.00135879	0.0984655	0.707381	3	9	0.000763488	-2.40897	9606	Homo sapiens	plxna4;sema7a		R-HSA-416723;R-HSA-434990;R-HSA-434989
R-HSA-427601	Multifunctional anion exchangers	2	19	0.00135879	0.0984655	0.707381	2	6	0.000508992	-6.87221	9606	Homo sapiens	slc5a12;slc26a1		R-HSA-427555;R-HSA-8876312
R-HSA-2142712	Synthesis of 12-eicosatetraenoic acid derivatives	2	19	0.00135879	0.0984655	0.707381	2	6	0.000508992	-2.32393	9606	Homo sapiens	alox12		R-HSA-2161948;R-HSA-2161964
R-HSA-390522	Striated Muscle Contraction	3	40	0.00286062	0.10133	0.707381	4	4	0.000339328	0.684972	9606	Homo sapiens	myh7;tnnt2a;mybpc3		R-HSA-390597;R-HSA-390598;R-HSA-390593;R-HSA-390595
R-HSA-2473224	Antagonism of Activin by Follistatin	1	4	0.000286062	0.105068	0.707381	2	2	0.000169664	-4.76468	9606	Homo sapiens	inhbaa		R-HSA-2473184;R-HSA-2473186
R-HSA-3359462	Defective AMN causes hereditary megaloblastic anemia 1	1	4	0.000286062	0.105068	0.707381	1	1	8.4832e-05	-6.12304	9606	Homo sapiens	cubn		R-HSA-3296477
R-HSA-1296067	Potassium transport channels	1	4	0.000286062	0.105068	0.707381	1	1	8.4832e-05	-7.19099	9606	Homo sapiens	kcnj16		R-HSA-1296045
R-HSA-3359463	Defective CUBN causes hereditary megaloblastic anemia 1	1	4	0.000286062	0.105068	0.707381	1	1	8.4832e-05	-6.12304	9606	Homo sapiens	cubn		R-HSA-3296462
R-HSA-196836	Vitamin C (ascorbate) metabolism	2	20	0.00143031	0.107203	0.707381	1	5	0.00042416	-2.31396	9606	Homo sapiens	slc23a1		R-HSA-198870
R-HSA-190242	FGFR1 ligand binding and activation	2	21	0.00150182	0.116139	0.707381	4	7	0.000593824	-3.43902	9606	Homo sapiens	fgf4;fgf10a		R-HSA-190256;R-HSA-190245;R-HSA-190427;R-HSA-190429
R-HSA-6798163	Choline catabolism	2	21	0.00150182	0.116139	0.707381	2	8	0.000678656	-2.08816	9606	Homo sapiens	bhmt;dmgdh		R-HSA-6797653;R-HSA-1614654
R-HSA-2022090	Assembly of collagen fibrils and other multimeric structures	4	67	0.00479153	0.117933	0.707381	5	26	0.00220563	-2.44287	9606	Homo sapiens	col4a5;lamc2;col6a1;ctsla		R-HSA-2559639;R-HSA-2213200;R-HSA-2213207;R-HSA-2213192;R-HSA-2396234
R-HSA-186712	Regulation of beta-cell development	4	67	0.00479153	0.117933	0.707381	4	26	0.00220563	-2.46179	9606	Homo sapiens	foxa3;myl7;fgf10a		R-HSA-211346;R-HSA-210769;R-HSA-210788;R-HSA-211482
R-HSA-1474228	Degradation of the extracellular matrix	7	148	0.0105843	0.120978	0.707381	22	105	0.00890736	-2.63945	9606	Homo sapiens	spock3;cdh1;col4a5;lamc2;plg;col6a1;ctsla		R-HSA-1602488;R-HSA-1592314;R-HSA-1602458;R-HSA-1592316;R-HSA-1564112;R-HSA-1604752;R-HSA-3791155;R-HSA-1592371;R-HSA-3827958;R-HSA-1454843;R-HSA-4224014;R-HSA-1604712;R-HSA-1604360;R-HSA-2514772;R-HSA-1592362;R-HSA-2534260;R-HSA-1454757;R-HSA-1566979;R-HSA-1592398;R-HSA-2534206;R-HSA-1564142;R-HSA-2537499
R-HSA-5654219	Phospholipase C-mediated cascade: FGFR1	2	22	0.00157334	0.125254	0.707381	3	3	0.000254496	-3.43902	9606	Homo sapiens	fgf4;fgf10a		R-HSA-5654167;R-HSA-5654165;R-HSA-5654149
R-HSA-190840	Microtubule-dependent trafficking of connexons from Golgi to the plasma membrane	2	22	0.00157334	0.125254	0.707381	1	2	0.000169664	-2.28958	9606	Homo sapiens	TUBB4B		R-HSA-190520
R-HSA-1474244	Extracellular matrix organization	13	329	0.0235286	0.13122	0.707381	85	318	0.0269766	-2.36258	9606	Homo sapiens	spock3;cdh1;mfap2;col4a5;nid2a;lamc3;lamc2;plg;col6a1;bmp2b;itgb6;ctsla		R-HSA-8948232;R-HSA-8944265;R-HSA-1602458;R-HSA-2002460;R-HSA-8948234;R-HSA-2426530;R-HSA-1604752;R-HSA-8948224;R-HSA-8948226;R-HSA-3791155;R-HSA-8948228;R-HSA-8948230;R-HSA-8948231;R-HSA-1604360;R-HSA-2426676;R-HSA-1566979;R-HSA-2327733;R-HSA-2396083;R-HSA-2534206;R-HSA-2327738;R-HSA-4084903;R-HSA-2395320;R-HSA-2466106;R-HSA-1602488;R-HSA-2161282;R-HSA-2022073;R-HSA-4084505;R-HSA-1592371;R-HSA-4…
R-HSA-190872	Transport of connexons to the plasma membrane	2	23	0.00164485	0.134534	0.707381	1	3	0.000254496	-2.28958	9606	Homo sapiens	TUBB4B		R-HSA-190520
R-HSA-2142700	Synthesis of Lipoxins (LX)	2	24	0.00171637	0.143962	0.707381	2	8	0.000678656	-2.0685	9606	Homo sapiens	ptgr1;alox12		R-HSA-2161844;R-HSA-2161775
R-HSA-427589	Type II Na+/Pi cotransporters	1	6	0.000429092	0.153397	0.707381	1	2	0.000169664	-8.2324	9606	Homo sapiens	slc34a1a		R-HSA-427656
R-HSA-5654221	Phospholipase C-mediated cascade; FGFR2	2	25	0.00178789	0.153523	0.707381	3	3	0.000254496	-3.43902	9606	Homo sapiens	fgf4;fgf10a		R-HSA-5654147;R-HSA-5654159;R-HSA-5654157
R-HSA-389977	Post-chaperonin tubulin folding pathway	2	25	0.00178789	0.153523	0.707381	6	9	0.000763488	-2.28958	9606	Homo sapiens	TUBB4B		R-HSA-389956;R-HSA-389974;R-HSA-389969;R-HSA-389955;R-HSA-389964;R-HSA-389976
R-HSA-1362277	Transcription of E2F targets under negative control by DREAM complex	2	25	0.00178789	0.153523	0.707381	2	12	0.00101798	0.808928	9606	Homo sapiens	top2a		R-HSA-8964475;R-HSA-8964531
R-HSA-9013695	NOTCH4 Intracellular Domain Regulates Transcription	2	26	0.0018594	0.163202	0.707381	1	9	0.000763488	0.693764	9606	Homo sapiens	hey2		R-HSA-9604553
R-HSA-1296059	G protein gated Potassium channels	2	27	0.00193092	0.172988	0.707381	1	1	8.4832e-05	-5.75458	9606	Homo sapiens	kcnj16;KCNJ15		R-HSA-1013020
R-HSA-1296041	Activation of G protein gated Potassium channels	2	27	0.00193092	0.172988	0.707381	1	1	8.4832e-05	-5.75458	9606	Homo sapiens	kcnj16;KCNJ15		R-HSA-1013020
R-HSA-997272	Inhibition of voltage gated Ca2+ channels via Gbeta/gamma subunits	2	27	0.00193092	0.172988	0.707381	1	1	8.4832e-05	-5.75458	9606	Homo sapiens	kcnj16;KCNJ15		R-HSA-1013020
R-HSA-190828	Gap junction trafficking	3	52	0.0037188	0.176705	0.707381	7	20	0.00169664	-2.32411	9606	Homo sapiens	dab2;TUBB4B		R-HSA-196017;R-HSA-190519;R-HSA-196026;R-HSA-190520;R-HSA-191737;R-HSA-190829;R-HSA-190877
R-HSA-5654689	PI-3K cascade:FGFR1	2	28	0.00200243	0.182865	0.707381	6	7	0.000593824	-3.43902	9606	Homo sapiens	fgf4;fgf10a		R-HSA-5654692;R-HSA-5654596;R-HSA-5654594;R-HSA-5654690;R-HSA-5654592;R-HSA-5654591
R-HSA-189200	Cellular hexose transport	2	28	0.00200243	0.182865	0.707381	3	17	0.00144214	-5.36613	9606	Homo sapiens	slc5a2;slc2a12		R-HSA-429094;R-HSA-189208;R-HSA-429613
R-HSA-6804115	TP53 regulates transcription of additional cell cycle genes whose exact role in the p53 pathway remain uncertain	2	28	0.00200243	0.182865	0.707381	2	14	0.00118765	-1.56531	9606	Homo sapiens	rgcc		R-HSA-6803917;R-HSA-6803914
R-HSA-5654688	SHC-mediated cascade:FGFR1	2	29	0.00207395	0.192822	0.707381	4	4	0.000339328	-3.43902	9606	Homo sapiens	fgf4;fgf10a		R-HSA-5654582;R-HSA-5654597;R-HSA-5654573;R-HSA-5654600
R-HSA-389957	Prefoldin mediated transfer of substrate to CCT/TriC	2	29	0.00207395	0.192822	0.707381	2	2	0.000169664	-2.28958	9606	Homo sapiens	TUBB4B		R-HSA-389970;R-HSA-389980
R-HSA-2033519	Activated point mutants of FGFR2	2	29	0.00207395	0.192822	0.707381	6	10	0.00084832	-3.43902	9606	Homo sapiens	fgf4;fgf10a		R-HSA-2033486;R-HSA-2077421;R-HSA-2033474;R-HSA-2077424;R-HSA-2033472;R-HSA-2033488
R-HSA-140837	Intrinsic Pathway of Fibrin Clot Formation	2	29	0.00207395	0.192822	0.707381	4	20	0.00169664	-2.70883	9606	Homo sapiens	serpine2;f2		R-HSA-158419;R-HSA-9603302;R-HSA-9015379;R-HSA-158137
R-HSA-176417	Phosphorylation of Emi1	1	8	0.000572123	0.199123	0.707381	2	2	0.000169664	-1.50871	9606	Homo sapiens	cdh1		R-HSA-174122;R-HSA-174174
R-HSA-166665	Terminal pathway of complement	1	8	0.000572123	0.199123	0.707381	4	5	0.00042416	-7.06541	9606	Homo sapiens	c9		R-HSA-173723;R-HSA-173720;R-HSA-173725;R-HSA-173709
R-HSA-5632681	Ligand-receptor interactions	1	8	0.000572123	0.199123	0.707381	1	4	0.000339328	-1.79484	9606	Homo sapiens	hhip		R-HSA-445448
R-HSA-5654693	FRS-mediated FGFR1 signaling	2	30	0.00214546	0.202848	0.707381	9	9	0.000763488	-3.43902	9606	Homo sapiens	fgf4;fgf10a		R-HSA-5654578;R-HSA-5654575;R-HSA-5654586;R-HSA-5654587;R-HSA-5654571;R-HSA-5654584;R-HSA-5654392;R-HSA-8941623;R-HSA-5654569
R-HSA-389960	Formation of tubulin folding intermediates by CCT/TriC	2	30	0.00214546	0.202848	0.707381	2	2	0.000169664	-2.28958	9606	Homo sapiens	TUBB4B		R-HSA-389954;R-HSA-389961
R-HSA-157858	Gap junction trafficking and regulation	3	56	0.00400486	0.204567	0.707381	7	24	0.00203597	-2.32411	9606	Homo sapiens	dab2;TUBB4B		R-HSA-196017;R-HSA-190519;R-HSA-196026;R-HSA-190520;R-HSA-191737;R-HSA-190829;R-HSA-190877
R-HSA-2122947	NOTCH1 Intracellular Domain Regulates Transcription	3	56	0.00400486	0.204567	0.707381	3	16	0.00135731	0.752135	9606	Homo sapiens	hey2;hdac7b		R-HSA-1912388;R-HSA-4396382;R-HSA-1980065
R-HSA-5654695	PI-3K cascade:FGFR2	2	31	0.00221698	0.21293	0.707381	6	7	0.000593824	-3.43902	9606	Homo sapiens	fgf4;fgf10a		R-HSA-5654614;R-HSA-5654612;R-HSA-5654622;R-HSA-5654620;R-HSA-5654701;R-HSA-5654697
R-HSA-9025094	Biosynthesis of DPAn-3 SPMs	2	31	0.00221698	0.21293	0.707381	3	18	0.00152698	-2.32393	9606	Homo sapiens	alox12		R-HSA-9026003;R-HSA-9026007;R-HSA-9026006
R-HSA-216083	Integrin cell surface interactions	4	86	0.00615033	0.218028	0.707381	6	54	0.00458093	-2.1694	9606	Homo sapiens	cdh1;col4a5;col6a1;itgb6		R-HSA-216050;R-HSA-4539779;R-HSA-4084903;R-HSA-265422;R-HSA-216040;R-HSA-2327695
R-HSA-190370	FGFR1b ligand binding and activation	1	9	0.000643639	0.221053	0.707381	2	2	0.000169664	-3.39221	9606	Homo sapiens	fgf10a		R-HSA-190245;R-HSA-190427
R-HSA-2142696	Synthesis of Hepoxilins (HX) and Trioxilins (TrX)	1	9	0.000643639	0.221053	0.707381	1	2	0.000169664	-2.32393	9606	Homo sapiens	alox12		R-HSA-2161794
R-HSA-8964011	HDL clearance	1	9	0.000643639	0.221053	0.707381	2	5	0.00042416	-6.12304	9606	Homo sapiens	cubn		R-HSA-264848;R-HSA-264834
R-HSA-159763	Transport of gamma-carboxylated protein precursors from the endoplasmic reticulum to the Golgi apparatus	1	9	0.000643639	0.221053	0.707381	1	9	0.000763488	-4.20427	9606	Homo sapiens	f2		R-HSA-159843
R-HSA-5654699	SHC-mediated cascade:FGFR2	2	32	0.00228849	0.223059	0.707381	4	4	0.000339328	-3.43902	9606	Homo sapiens	fgf4;fgf10a		R-HSA-5654406;R-HSA-5654407;R-HSA-5654404;R-HSA-5654402
R-HSA-8874081	MET activates PTK2 signaling	2	32	0.00228849	0.223059	0.707381	1	5	0.00042416	-3.39995	9606	Homo sapiens	lamc3;lamc2		R-HSA-8874079
R-HSA-5654700	FRS-mediated FGFR2 signaling	2	33	0.00236001	0.233224	0.707381	9	9	0.000763488	-3.43902	9606	Homo sapiens	fgf4;fgf10a		R-HSA-5654615;R-HSA-5654608;R-HSA-5654607;R-HSA-5654399;R-HSA-8941618;R-HSA-5654605;R-HSA-5654397;R-HSA-5654618;R-HSA-5654603
R-HSA-3000171	Non-integrin membrane-ECM interactions	3	61	0.00436244	0.240654	0.707381	3	22	0.0018663	-3.11764	9606	Homo sapiens	col4a5;lamc3;lamc2		R-HSA-2328129;R-HSA-2426355;R-HSA-2327738
R-HSA-8951430	RUNX3 regulates WNT signaling	1	10	0.000715154	0.242384	0.707381	5	5	0.00042416	-1.2062	9606	Homo sapiens	tcf7l2		R-HSA-4411367;R-HSA-8951442;R-HSA-8951443;R-HSA-8951428;R-HSA-4411357
R-HSA-4411364	Binding of TCF/LEF:CTNNB1 to target gene promoters	1	10	0.000715154	0.242384	0.707381	4	4	0.000339328	-1.2062	9606	Homo sapiens	tcf7l2		R-HSA-4411351;R-HSA-4411367;R-HSA-4411357;R-HSA-4411372
R-HSA-1300644	Interaction With The Zona Pellucida	1	10	0.000715154	0.242384	0.707381	1	1	8.4832e-05	-3.35654	9606	Homo sapiens	zgc:174164		R-HSA-1297338
R-HSA-2892245	POU5F1 (OCT4), SOX2, NANOG repress genes related to differentiation	1	10	0.000715154	0.242384	0.707381	6	7	0.000593824	-3.80857	9606	Homo sapiens	sox2		R-HSA-2972965;R-HSA-2972949;R-HSA-2972948;R-HSA-2972966;R-HSA-2972977;R-HSA-2972979
R-HSA-8964046	VLDL clearance	1	10	0.000715154	0.242384	0.707381	1	3	0.000254496	-2.11038	9606	Homo sapiens	lsr		R-HSA-8933292
R-HSA-209822	Glycoprotein hormones	1	10	0.000715154	0.242384	0.707381	1	4	0.000339328	-4.76468	9606	Homo sapiens	inhbaa		R-HSA-378975
R-HSA-5336415	Uptake and function of diphtheria toxin	1	10	0.000715154	0.242384	0.707381	1	5	0.00042416	0.890634	9606	Homo sapiens	eef2l2		R-HSA-5336421
R-HSA-159782	Removal of aminoterminal propeptides from gamma-carboxylated proteins	1	10	0.000715154	0.242384	0.707381	1	9	0.000763488	-4.20427	9606	Homo sapiens	f2		R-HSA-159728
R-HSA-140875	Common Pathway of Fibrin Clot Formation	2	34	0.00243152	0.243417	0.707381	12	29	0.00246013	-2.70883	9606	Homo sapiens	serpine2;f2		R-HSA-141040;R-HSA-140870;R-HSA-141046;R-HSA-140599;R-HSA-5602080;R-HSA-140791;R-HSA-5578883;R-HSA-140696;R-HSA-140872;R-HSA-140840;R-HSA-140664;R-HSA-140700
R-HSA-1296065	Inwardly rectifying K+ channels	2	34	0.00243152	0.243417	0.707381	2	5	0.00042416	-5.75458	9606	Homo sapiens	kcnj16;KCNJ15		R-HSA-1013020;R-HSA-1296045
R-HSA-9018683	Biosynthesis of DPA-derived SPMs	2	35	0.00250304	0.253627	0.707381	5	21	0.00178147	-2.32393	9606	Homo sapiens	alox12		R-HSA-9025152;R-HSA-9026003;R-HSA-9025957;R-HSA-9026007;R-HSA-9026006
R-HSA-5610787	Hedgehog 'off' state	5	124	0.00886791	0.262949	0.707381	13	32	0.00271463	-1.37597	9606	Homo sapiens	TUBB4B;gli1;psme4a		R-HSA-5610741;R-HSA-5610742;R-HSA-5610737;R-HSA-5610757;R-HSA-5617412;R-HSA-5610758;R-HSA-5617408;R-HSA-5610723;R-HSA-5610754;R-HSA-5610733;R-HSA-5610767;R-HSA-5610766;R-HSA-5610760
R-HSA-196025	Formation of annular gap junctions	1	11	0.00078667	0.263133	0.707381	2	2	0.000169664	-2.39318	9606	Homo sapiens	dab2		R-HSA-196017;R-HSA-196026
R-HSA-164940	Nef mediated downregulation of MHC class I complex cell surface expression	1	11	0.00078667	0.263133	0.707381	3	4	0.000339328	-2.164	9606	Homo sapiens	ap1s3b		R-HSA-182263;R-HSA-182279;R-HSA-182286
R-HSA-446107	Type I hemidesmosome assembly	1	11	0.00078667	0.263133	0.707381	4	6	0.000508992	-4.74693	9606	Homo sapiens	lamc2		R-HSA-446083;R-HSA-432956;R-HSA-446077;R-HSA-446089
R-HSA-5652227	Fructose biosynthesis	1	11	0.00078667	0.263133	0.707381	1	2	0.000169664	-2.58147	9606	Homo sapiens	sord		R-HSA-5652195
R-HSA-8939242	RUNX1 regulates transcription of genes involved in differentiation of keratinocytes	1	11	0.00078667	0.263133	0.707381	1	8	0.000678656	-1.29211	9606	Homo sapiens	ctsla		R-HSA-8938108
R-HSA-351906	Apoptotic cleavage of cell adhesion proteins	1	11	0.00078667	0.263133	0.707381	1	10	0.00084832	-1.50871	9606	Homo sapiens	cdh1		R-HSA-202939
R-HSA-9013508	NOTCH3 Intracellular Domain Regulates Transcription	2	36	0.00257455	0.263846	0.707381	1	22	0.0018663	0.693764	9606	Homo sapiens	hey2		R-HSA-9014141
R-HSA-389958	Cooperation of Prefoldin and TriC/CCT in actin and tubulin folding	2	37	0.00264607	0.274066	0.707381	4	6	0.000508992	-2.28958	9606	Homo sapiens	TUBB4B		R-HSA-389970;R-HSA-389954;R-HSA-389980;R-HSA-389961
R-HSA-381426	Regulation of Insulin-like Growth Factor (IGF) transport and uptake by Insulin-like Growth Factor Binding Proteins (IGFBPs)	5	127	0.00908246	0.278679	0.707381	3	14	0.00118765	-3.65669	9606	Homo sapiens	vwa1;plg;f2;bmp2b;tfa		R-HSA-381461;R-HSA-381446;R-HSA-8952289
R-HSA-190873	Gap junction degradation	1	12	0.000858185	0.283315	0.707381	4	4	0.000339328	-2.39318	9606	Homo sapiens	dab2		R-HSA-196017;R-HSA-190519;R-HSA-196026;R-HSA-190829
R-HSA-8866907	Activation of the TFAP2 (AP-2) family of transcription factors	1	12	0.000858185	0.283315	0.707381	1	4	0.000339328	-0.791689	9606	Homo sapiens	cited4a		R-HSA-8864307
R-HSA-1538133	G0 and Early G1	2	38	0.00271759	0.28428	0.707381	2	27	0.00229046	0.808928	9606	Homo sapiens	top2a		R-HSA-8964475;R-HSA-8964531
R-HSA-2644606	Constitutive Signaling by NOTCH1 PEST Domain Mutants	3	68	0.00486305	0.292659	0.707381	3	21	0.00178147	0.752135	9606	Homo sapiens	hey2;hdac7b		R-HSA-4396402;R-HSA-2220981;R-HSA-2220982
R-HSA-2894858	Signaling by NOTCH1 HD+PEST Domain Mutants in Cancer	3	68	0.00486305	0.292659	0.707381	3	21	0.00178147	0.752135	9606	Homo sapiens	hey2;hdac7b		R-HSA-4396402;R-HSA-2220981;R-HSA-2220982
R-HSA-2894862	Constitutive Signaling by NOTCH1 HD+PEST Domain Mutants	3	68	0.00486305	0.292659	0.707381	3	21	0.00178147	0.752135	9606	Homo sapiens	hey2;hdac7b		R-HSA-4396402;R-HSA-2220981;R-HSA-2220982
R-HSA-2644602	Signaling by NOTCH1 PEST Domain Mutants in Cancer	3	68	0.00486305	0.292659	0.707381	3	21	0.00178147	0.752135	9606	Homo sapiens	hey2;hdac7b		R-HSA-4396402;R-HSA-2220981;R-HSA-2220982
R-HSA-2644603	Signaling by NOTCH1 in Cancer	3	68	0.00486305	0.292659	0.707381	3	39	0.00330845	0.752135	9606	Homo sapiens	hey2;hdac7b		R-HSA-4396402;R-HSA-2220981;R-HSA-2220982
R-HSA-549127	Organic cation transport	2	39	0.0027891	0.294479	0.707381	2	9	0.000763488	-5.90603	9606	Homo sapiens	slc22a21		R-HSA-549241;R-HSA-549297
R-HSA-5654726	Negative regulation of FGFR1 signaling	2	39	0.0027891	0.294479	0.707381	3	15	0.00127248	-3.43902	9606	Homo sapiens	fgf4;fgf10a		R-HSA-5654672;R-HSA-5654560;R-HSA-5654673
R-HSA-186797	Signaling by PDGF	3	69	0.00493456	0.300168	0.707381	2	28	0.0023753	-3.18885	9606	Homo sapiens	col4a5;plg;col6a1		R-HSA-382054;R-HSA-382061
R-HSA-173107	Binding and entry of HIV virion	1	13	0.0009297	0.302945	0.707381	6	8	0.000678656	-3.83223	9606	Homo sapiens	cxcr4a		R-HSA-164515;R-HSA-164500;R-HSA-164507;R-HSA-164521;R-HSA-164524;R-HSA-164508
R-HSA-173599	Formation of the active cofactor, UDP-glucuronate	1	13	0.0009297	0.302945	0.707381	1	3	0.000254496	-0.722599	9606	Homo sapiens	ugp2b		R-HSA-70286
R-HSA-174362	Transport and synthesis of PAPS	1	13	0.0009297	0.302945	0.707381	1	4	0.000339328	-4.20043	9606	Homo sapiens	slc26a1		R-HSA-427555
R-HSA-209952	Peptide hormone biosynthesis	1	13	0.0009297	0.302945	0.707381	1	5	0.00042416	-4.76468	9606	Homo sapiens	inhbaa		R-HSA-378975
R-HSA-6799990	Metal sequestration by antimicrobial proteins	1	13	0.0009297	0.302945	0.707381	1	5	0.00042416	-3.08489	9606	Homo sapiens	tfa		R-HSA-1222491
R-HSA-425393	Transport of inorganic cations/anions and amino acids/oligopeptides	6	165	0.0118	0.310086	0.707381	11	75	0.0063624	-6.21199	9606	Homo sapiens	slc5a12;slc20a1a;slc34a1a;slc26a1;zgc:158423;slc6a14		R-HSA-379415;R-HSA-427605;R-HSA-378513;R-HSA-427555;R-HSA-379426;R-HSA-375487;R-HSA-352191;R-HSA-376200;R-HSA-352232;R-HSA-427656;R-HSA-8876312
R-HSA-5654687	Downstream signaling of activated FGFR1	2	41	0.00293213	0.31481	0.707381	23	24	0.00203597	-3.43902	9606	Homo sapiens	fgf4;fgf10a		R-HSA-5654582;R-HSA-5654167;R-HSA-5654165;R-HSA-5654578;R-HSA-5654591;R-HSA-5654586;R-HSA-5654587;R-HSA-5654584;R-HSA-5654392;R-HSA-5654692;R-HSA-5654596;R-HSA-5654597;R-HSA-5654149;R-HSA-5654594;R-HSA-5654690;R-HSA-5656064;R-HSA-5654592;R-HSA-5654575;R-HSA-5654573;R-HSA-5654571;R-HSA-5654600;R-HSA-8941623;R-HSA-5654569
R-HSA-5654696	Downstream signaling of activated FGFR2	2	41	0.00293213	0.31481	0.707381	22	23	0.00195114	-3.43902	9606	Homo sapiens	fgf4;fgf10a		R-HSA-5654614;R-HSA-5654615;R-HSA-5654612;R-HSA-5654608;R-HSA-5654622;R-HSA-5654399;R-HSA-5654620;R-HSA-5654397;R-HSA-5654618;R-HSA-5654406;R-HSA-5654407;R-HSA-5654404;R-HSA-5654402;R-HSA-5654147;R-HSA-5654607;R-HSA-5654159;R-HSA-8941618;R-HSA-5654701;R-HSA-5654605;R-HSA-5654157;R-HSA-5654603;R-HSA-5654697
R-HSA-5654727	Negative regulation of FGFR2 signaling	2	41	0.00293213	0.31481	0.707381	3	14	0.00118765	-3.43902	9606	Homo sapiens	fgf4;fgf10a		R-HSA-5654677;R-HSA-5654562;R-HSA-5654729
R-HSA-190861	Gap junction assembly	2	41	0.00293213	0.31481	0.707381	3	16	0.00135731	-2.28958	9606	Homo sapiens	TUBB4B		R-HSA-190520;R-HSA-191737;R-HSA-190877
R-HSA-8876493	InlA-mediated entry of Listeria monocytogenes into host cells	1	14	0.00100122	0.32204	0.707381	5	5	0.00042416	-1.50871	9606	Homo sapiens	cdh1		R-HSA-8876948;R-HSA-8876497;R-HSA-8876993;R-HSA-112333;R-HSA-8877003
R-HSA-9026290	Biosynthesis of DPAn-3-derived maresins	1	14	0.00100122	0.32204	0.707381	2	5	0.00042416	-2.32393	9606	Homo sapiens	alox12		R-HSA-9026007;R-HSA-9026006
R-HSA-210747	Regulation of gene expression in early pancreatic precursor cells	1	14	0.00100122	0.32204	0.707381	2	6	0.000508992	-3.39221	9606	Homo sapiens	fgf10a		R-HSA-210769;R-HSA-210788
R-HSA-5362517	Signaling by Retinoic Acid	3	72	0.00514911	0.322741	0.707381	4	21	0.00178147	-2.13466	9606	Homo sapiens	dhrs3a;rbp5;rdh10a		R-HSA-5622134;R-HSA-5362518;R-HSA-5362525;R-HSA-5419165
R-HSA-8964043	Plasma lipoprotein clearance	2	42	0.00300365	0.324929	0.707381	4	35	0.00296912	-4.11671	9606	Homo sapiens	cubn;lsr		R-HSA-8933258;R-HSA-264848;R-HSA-8933292;R-HSA-264834
R-HSA-1474290	Collagen formation	4	104	0.0074376	0.327103	0.707381	27	77	0.00653207	-2.44287	9606	Homo sapiens	col4a5;lamc2;col6a1;ctsla		R-HSA-8948232;R-HSA-8944265;R-HSA-2002460;R-HSA-8948234;R-HSA-8948224;R-HSA-8948226;R-HSA-8948228;R-HSA-8948230;R-HSA-8948231;R-HSA-1981128;R-HSA-1980233;R-HSA-1981120;R-HSA-1650808;R-HSA-1614460;R-HSA-1614461;R-HSA-2022073;R-HSA-2213192;R-HSA-2089971;R-HSA-2396234;R-HSA-1981104;R-HSA-2559639;R-HSA-2213200;R-HSA-8948219;R-HSA-2213207;R-HSA-8948222;R-HSA-1981157;R-HSA-8944247
R-HSA-432720	Lysosome Vesicle Biogenesis	2	43	0.00307516	0.335008	0.707381	5	8	0.000678656	-1.71341	9606	Homo sapiens	vamp8;ap1s3b		R-HSA-432706;R-HSA-432707;R-HSA-432688;R-HSA-5333658;R-HSA-432712
R-HSA-913709	O-linked glycosylation of mucins	3	74	0.00529214	0.337798	0.707381	1	17	0.00144214	-2.81005	9606	Homo sapiens	galnt6;galnt14;galnt18b		R-HSA-913675
R-HSA-1502540	Signaling by Activin	1	15	0.00107273	0.340612	0.707381	7	10	0.00084832	-4.76468	9606	Homo sapiens	inhbaa		R-HSA-1549526;R-HSA-1181153;R-HSA-2473184;R-HSA-2470483;R-HSA-2473186;R-HSA-2470508;R-HSA-1181149
R-HSA-190373	FGFR1c ligand binding and activation	1	15	0.00107273	0.340612	0.707381	2	3	0.000254496	-3.48584	9606	Homo sapiens	fgf4		R-HSA-190256;R-HSA-190429
R-HSA-1839122	Signaling by activated point mutants of FGFR1	1	15	0.00107273	0.340612	0.707381	2	4	0.000339328	-3.48584	9606	Homo sapiens	fgf4		R-HSA-2023455;R-HSA-2023451
R-HSA-3772470	Negative regulation of TCF-dependent signaling by WNT ligand antagonists	1	15	0.00107273	0.340612	0.707381	1	5	0.00042416	-2.41704	9606	Homo sapiens	sost		R-HSA-3769397
R-HSA-159740	Gamma-carboxylation of protein precursors	1	15	0.00107273	0.340612	0.707381	1	9	0.000763488	-4.20427	9606	Homo sapiens	f2		R-HSA-159826
R-HSA-3769402	Deactivation of the beta-catenin transactivating complex	2	44	0.00314668	0.345042	0.707381	4	14	0.00118765	-2.50739	9606	Homo sapiens	tcf7l2;sox2		R-HSA-3361751;R-HSA-3364042;R-HSA-5665608;R-HSA-5626938
R-HSA-419037	NCAM1 interactions	2	44	0.00314668	0.345042	0.707381	1	10	0.00084832	-1.86622	9606	Homo sapiens	col4a5;col6a1		R-HSA-375151
R-HSA-8948216	Collagen chain trimerization	2	44	0.00314668	0.345042	0.707381	2	28	0.0023753	-1.86622	9606	Homo sapiens	col4a5;col6a1		R-HSA-8944265;R-HSA-8944247
R-HSA-991365	Activation of GABAB receptors	2	45	0.00321819	0.355027	0.707381	1	6	0.000508992	-5.75458	9606	Homo sapiens	kcnj16;KCNJ15		R-HSA-1013020
R-HSA-977444	GABA B receptor activation	2	45	0.00321819	0.355027	0.707381	1	7	0.000593824	-5.75458	9606	Homo sapiens	kcnj16;KCNJ15		R-HSA-1013020
R-HSA-8875878	MET promotes cell motility	2	45	0.00321819	0.355027	0.707381	1	12	0.00101798	-3.39995	9606	Homo sapiens	lamc3;lamc2		R-HSA-8874079
R-HSA-5619094	Variant SLC6A14 may confer susceptibility towards obesity	1	16	0.00114425	0.358677	0.707381	1	1	8.4832e-05	-4.94032	9606	Homo sapiens	slc6a14		R-HSA-5659674
R-HSA-77285	Beta oxidation of myristoyl-CoA to lauroyl-CoA	1	16	0.00114425	0.358677	0.707381	3	4	0.000339328	0.50275	9606	Homo sapiens	hadhb		R-HSA-77283;R-HSA-77271;R-HSA-77277
R-HSA-4641265	Repression of WNT target genes	1	16	0.00114425	0.358677	0.707381	5	7	0.000593824	-1.2062	9606	Homo sapiens	tcf7l2		R-HSA-5334050;R-HSA-8944349;R-HSA-8944352;R-HSA-4641231;R-HSA-5229348
R-HSA-1679131	Trafficking and processing of endosomal TLR	1	16	0.00114425	0.358677	0.707381	1	7	0.000593824	-1.29211	9606	Homo sapiens	ctsla		R-HSA-1678981
R-HSA-159854	Gamma-carboxylation, transport, and amino-terminal cleavage of proteins	1	16	0.00114425	0.358677	0.707381	3	27	0.00229046	-4.20427	9606	Homo sapiens	f2		R-HSA-159826;R-HSA-159843;R-HSA-159728
R-HSA-9026286	Biosynthesis of DPAn-3-derived protectins and resolvins	1	16	0.00114425	0.358677	0.707381	1	9	0.000763488	-2.32393	9606	Homo sapiens	alox12		R-HSA-9026003
R-HSA-5674135	MAP2K and MAPK activation	2	47	0.00336122	0.374829	0.707381	6	8	0.000678656	-2.21275	9606	Homo sapiens	cnksr1;il17rd		R-HSA-5672980;R-HSA-5674373;R-HSA-5672978;R-HSA-5674366;R-HSA-5672972;R-HSA-5672973
R-HSA-3000178	ECM proteoglycans	3	79	0.00564972	0.37531	0.707381	4	23	0.00195114	-2.38963	9606	Homo sapiens	col4a5;col6a1;itgb6		R-HSA-2327909;R-HSA-2681667;R-HSA-2465883;R-HSA-2466106
R-HSA-190375	FGFR2c ligand binding and activation	1	17	0.00121576	0.376248	0.707381	2	2	0.000169664	-3.48584	9606	Homo sapiens	fgf4		R-HSA-190258;R-HSA-190413
R-HSA-190322	FGFR4 ligand binding and activation	1	17	0.00121576	0.376248	0.707381	2	4	0.000339328	-3.48584	9606	Homo sapiens	fgf4		R-HSA-190326;R-HSA-190265
R-HSA-1663150	The activation of arylsulfatases	1	17	0.00121576	0.376248	0.707381	1	2	0.000169664	-3.45372	9606	Homo sapiens	arsj		R-HSA-1614362
R-HSA-1839130	Signaling by activated point mutants of FGFR3	1	17	0.00121576	0.376248	0.707381	2	6	0.000508992	-3.48584	9606	Homo sapiens	fgf4		R-HSA-2012074;R-HSA-2012073
R-HSA-1222449	Mtb iron assimilation by chelation	1	17	0.00121576	0.376248	0.707381	3	10	0.00084832	-3.08489	9606	Homo sapiens	tfa		R-HSA-1222641;R-HSA-8951549;R-HSA-8951552
R-HSA-1839126	FGFR2 mutant receptor activation	2	48	0.00343274	0.384638	0.707381	6	18	0.00152698	-3.43902	9606	Homo sapiens	fgf4;fgf10a		R-HSA-2033486;R-HSA-2077421;R-HSA-2033474;R-HSA-2077424;R-HSA-2033472;R-HSA-2033488
R-HSA-380108	Chemokine receptors bind chemokines	2	48	0.00343274	0.384638	0.707381	1	18	0.00152698	-2.86722	9606	Homo sapiens	ackr3b;cxcr4a		R-HSA-374214
R-HSA-399956	CRMPs in Sema3A signaling	1	18	0.00128728	0.393339	0.707381	5	5	0.00042416	-2.02661	9606	Homo sapiens	plxna4		R-HSA-399951;R-HSA-399946;R-HSA-399931;R-HSA-399947;R-HSA-399944
R-HSA-5654227	Phospholipase C-mediated cascade; FGFR3	1	18	0.00128728	0.393339	0.707381	3	3	0.000254496	-3.48584	9606	Homo sapiens	fgf4		R-HSA-5654148;R-HSA-5654224;R-HSA-5654222
R-HSA-190372	FGFR3c ligand binding and activation	1	18	0.00128728	0.393339	0.707381	2	4	0.000339328	-3.48584	9606	Homo sapiens	fgf4		R-HSA-190388;R-HSA-190261
R-HSA-9018681	Biosynthesis of protectins	1	18	0.00128728	0.393339	0.707381	2	6	0.000508992	-2.32393	9606	Homo sapiens	alox12		R-HSA-9024872;R-HSA-9020262
R-HSA-77350	Beta oxidation of hexanoyl-CoA to butanoyl-CoA	1	18	0.00128728	0.393339	0.707381	1	4	0.000339328	0.50275	9606	Homo sapiens	hadhb		R-HSA-77321
R-HSA-77348	Beta oxidation of octanoyl-CoA to hexanoyl-CoA	1	18	0.00128728	0.393339	0.707381	1	4	0.000339328	0.50275	9606	Homo sapiens	hadhb		R-HSA-77329
R-HSA-77310	Beta oxidation of lauroyl-CoA to decanoyl-CoA-CoA	1	18	0.00128728	0.393339	0.707381	1	4	0.000339328	0.50275	9606	Homo sapiens	hadhb		R-HSA-77309
R-HSA-5607763	CLEC7A (Dectin-1) induces NFAT activation	1	18	0.00128728	0.393339	0.707381	1	6	0.000508992	-2.21048	9606	Homo sapiens	ahcyl1		R-HSA-169683
R-HSA-9023661	Biosynthesis of E-series 18(R)-resolvins	1	18	0.00128728	0.393339	0.707381	1	7	0.000593824	-2.32393	9606	Homo sapiens	alox12		R-HSA-9018907
R-HSA-1482798	Acyl chain remodeling of CL	1	18	0.00128728	0.393339	0.707381	1	12	0.00101798	0.50275	9606	Homo sapiens	hadhb		R-HSA-1482775
R-HSA-1170546	Prolactin receptor signaling	1	18	0.00128728	0.393339	0.707381	1	14	0.00118765	0.730084	9606	Homo sapiens	ghrb		R-HSA-982810
R-HSA-8852276	The role of GTSE1 in G2/M progression after G2 checkpoint	3	83	0.00593578	0.405017	0.707381	4	10	0.00084832	-1.22796	9606	Homo sapiens	TUBB4B;psme4a		R-HSA-8852306;R-HSA-8852354;R-HSA-8852298;R-HSA-8852280
R-HSA-1980143	Signaling by NOTCH1	3	83	0.00593578	0.405017	0.707381	3	37	0.00313879	0.752135	9606	Homo sapiens	hey2;hdac7b		R-HSA-1912388;R-HSA-4396382;R-HSA-1980065
R-HSA-5619102	SLC transporter disorders	5	151	0.0107988	0.408417	0.707381	6	66	0.00559891	-5.37843	9606	Homo sapiens	slc5a2;myl7;slc22a21;slc34a1a;slc6a14		R-HSA-5651685;R-HSA-5661474;R-HSA-5658163;R-HSA-5621918;R-HSA-5659674;R-HSA-5625674
R-HSA-5654228	Phospholipase C-mediated cascade; FGFR4	1	19	0.00135879	0.409963	0.707381	3	3	0.000254496	-3.48584	9606	Homo sapiens	fgf4		R-HSA-5654151;R-HSA-5654163;R-HSA-5654169
R-HSA-399955	SEMA3A-Plexin repulsion signaling by inhibiting Integrin adhesion	1	19	0.00135879	0.409963	0.707381	6	8	0.000678656	-2.02661	9606	Homo sapiens	plxna4		R-HSA-399942;R-HSA-399941;R-HSA-399934;R-HSA-399935;R-HSA-399933;R-HSA-399928
R-HSA-399954	Sema3A PAK dependent Axon repulsion	1	19	0.00135879	0.409963	0.707381	3	6	0.000508992	-2.02661	9606	Homo sapiens	plxna4		R-HSA-399939;R-HSA-399952;R-HSA-399930
R-HSA-190239	FGFR3 ligand binding and activation	1	19	0.00135879	0.409963	0.707381	2	6	0.000508992	-3.48584	9606	Homo sapiens	fgf4		R-HSA-190388;R-HSA-190261
R-HSA-5676934	Protein repair	1	19	0.00135879	0.409963	0.707381	2	7	0.000593824	-2.18713	9606	Homo sapiens	txn		R-HSA-5676917;R-HSA-5676940
R-HSA-2187335	The retinoid cycle in cones (daylight vision)	1	19	0.00135879	0.409963	0.707381	1	11	0.000933152	-3.0784	9606	Homo sapiens	dhrs3a		R-HSA-2465940
R-HSA-549132	Organic cation/anion/zwitterion transport	2	51	0.00364729	0.413646	0.707381	2	12	0.00101798	-5.90603	9606	Homo sapiens	slc22a21		R-HSA-549241;R-HSA-549297
R-HSA-8955332	Carboxyterminal post-translational modifications of tubulin	2	52	0.0037188	0.423165	0.707381	6	6	0.000508992	-2.28958	9606	Homo sapiens	TUBB4B		R-HSA-8955706;R-HSA-8955869;R-HSA-8955712;R-HSA-8865774;R-HSA-8867370;R-HSA-8866105
R-HSA-140877	Formation of Fibrin Clot (Clotting Cascade)	2	52	0.0037188	0.423165	0.707381	16	57	0.00483543	-2.70883	9606	Homo sapiens	serpine2;f2		R-HSA-140870;R-HSA-140872;R-HSA-140840;R-HSA-158419;R-HSA-141040;R-HSA-9603302;R-HSA-141046;R-HSA-140599;R-HSA-5602080;R-HSA-140791;R-HSA-5578883;R-HSA-140696;R-HSA-9015379;R-HSA-140664;R-HSA-158137;R-HSA-140700
R-HSA-2142691	Synthesis of Leukotrienes (LT) and Eoxins (EX)	2	52	0.0037188	0.423165	0.707381	2	19	0.00161181	-2.0685	9606	Homo sapiens	ptgr1;alox12		R-HSA-2162019;R-HSA-2161567
R-HSA-8849175	Threonine catabolism	1	20	0.00143031	0.426133	0.707381	2	4	0.000339328	-1.12079	9606	Homo sapiens	tdh		R-HSA-6798667;R-HSA-6798345
R-HSA-388844	Receptor-type tyrosine-protein phosphatases	1	20	0.00143031	0.426133	0.707381	2	6	0.000508992	-1.28076	9606	Homo sapiens	ptprfb		R-HSA-6798258;R-HSA-388824
R-HSA-193993	Mineralocorticoid biosynthesis	1	20	0.00143031	0.426133	0.707381	2	7	0.000593824	-5.28171	9606	Homo sapiens	hsd3b1		R-HSA-196350;R-HSA-193052
R-HSA-418457	cGMP effects	1	20	0.00143031	0.426133	0.707381	1	4	0.000339328	-3.03802	9606	Homo sapiens	kcnma1a		R-HSA-418549
R-HSA-937072	TRAF6-mediated induction of TAK1 complex within TLR4 complex	1	20	0.00143031	0.426133	0.707381	1	6	0.000508992	-3.93616	9606	Homo sapiens	sarm1		R-HSA-936985
R-HSA-936964	Activation of IRF3/IRF7 mediated by TBK1/IKK epsilon	1	20	0.00143031	0.426133	0.707381	1	9	0.000763488	-3.93616	9606	Homo sapiens	sarm1		R-HSA-2201338
R-HSA-77286	mitochondrial fatty acid beta-oxidation of saturated fatty acids	2	53	0.00379032	0.432603	0.707381	11	29	0.00246013	0.548187	9606	Homo sapiens	hadhb;acadvl		R-HSA-77329;R-HSA-77299;R-HSA-77283;R-HSA-77301;R-HSA-77271;R-HSA-77303;R-HSA-77321;R-HSA-77304;R-HSA-77277;R-HSA-77309;R-HSA-77340
R-HSA-5683826	Surfactant metabolism	2	53	0.00379032	0.432603	0.707381	2	27	0.00229046	-5.88247	9606	Homo sapiens	si:dkey-14d8.20;slc34a1a		R-HSA-5687284;R-HSA-427656
R-HSA-5654738	Signaling by FGFR2	3	87	0.00622184	0.434301	0.707381	30	46	0.00390227	-4.48454	9606	Homo sapiens	fgf4;fgf10a;fgfbp1b		R-HSA-5654614;R-HSA-5654615;R-HSA-5654612;R-HSA-5654677;R-HSA-5654608;R-HSA-5654622;R-HSA-190408;R-HSA-5654620;R-HSA-5654618;R-HSA-190413;R-HSA-5656070;R-HSA-5654406;R-HSA-5654407;R-HSA-5654404;R-HSA-5654402;R-HSA-5654147;R-HSA-5654607;R-HSA-5654159;R-HSA-5654605;R-HSA-5654157;R-HSA-5654603;R-HSA-5654729;R-HSA-5654399;R-HSA-5654397;R-HSA-190258;R-HSA-5654562;R-HSA-190260;R-HSA-8941618;R-HSA-56547…
R-HSA-977225	Amyloid fiber formation	3	88	0.00629336	0.44154	0.707381	4	33	0.00279946	-2.04209	9606	Homo sapiens	sorl1;tgfbi;tfa		R-HSA-976734;R-HSA-8871494;R-HSA-8871506;R-HSA-977136
R-HSA-2892247	POU5F1 (OCT4), SOX2, NANOG activate genes related to proliferation	1	21	0.00150182	0.44186	0.707381	16	16	0.00135731	-3.80857	9606	Homo sapiens	sox2		R-HSA-2972975;R-HSA-480515;R-HSA-452515;R-HSA-452750;R-HSA-2972964;R-HSA-2972967;R-HSA-2972960;R-HSA-2972962;R-HSA-480470;R-HSA-2972956;R-HSA-452338;R-HSA-452958;R-HSA-480509;R-HSA-452701;R-HSA-2972978;R-HSA-6800120
R-HSA-176407	Conversion from APC/C:Cdc20 to APC/C:Cdh1 in late anaphase	1	21	0.00150182	0.44186	0.707381	2	3	0.000254496	-1.50871	9606	Homo sapiens	cdh1		R-HSA-174070;R-HSA-174124
R-HSA-77288	mitochondrial fatty acid beta-oxidation of unsaturated fatty acids	1	21	0.00150182	0.44186	0.707381	2	6	0.000508992	0.50275	9606	Homo sapiens	hadhb		R-HSA-109339;R-HSA-109342
R-HSA-196791	Vitamin D (calciferol) metabolism	1	21	0.00150182	0.44186	0.707381	5	19	0.00161181	-6.12304	9606	Homo sapiens	cubn		R-HSA-8963864;R-HSA-209760;R-HSA-350158;R-HSA-350168;R-HSA-350186
R-HSA-77346	Beta oxidation of decanoyl-CoA to octanoyl-CoA-CoA	1	21	0.00150182	0.44186	0.707381	1	5	0.00042416	0.50275	9606	Homo sapiens	hadhb		R-HSA-77340
R-HSA-5661270	Formation of xylulose-5-phosphate	1	21	0.00150182	0.44186	0.707381	1	6	0.000508992	-2.58147	9606	Homo sapiens	sord		R-HSA-5662471
R-HSA-174113	SCF-beta-TrCP mediated degradation of Emi1	2	55	0.00393335	0.451229	0.707381	3	3	0.000254496	-0.306724	9606	Homo sapiens	cdh1;psme4a		R-HSA-174209;R-HSA-174203;R-HSA-174159
R-HSA-437239	Recycling pathway of L1	2	55	0.00393335	0.451229	0.707381	2	14	0.00118765	-2.28958	9606	Homo sapiens	TUBB4B		R-HSA-445077;R-HSA-445071
R-HSA-2142770	Synthesis of 15-eicosatetraenoic acid derivatives	1	22	0.00157334	0.457158	0.707381	1	4	0.000339328	-2.32393	9606	Homo sapiens	alox12		R-HSA-2162002
R-HSA-164938	Nef-mediates down modulation of cell surface receptors by recruiting them to clathrin adapters	1	22	0.00157334	0.457158	0.707381	3	15	0.00127248	-2.164	9606	Homo sapiens	ap1s3b		R-HSA-182263;R-HSA-182279;R-HSA-182286
R-HSA-209905	Catecholamine biosynthesis	1	22	0.00157334	0.457158	0.707381	1	6	0.000508992	-7.55379	9606	Homo sapiens	dbh		R-HSA-209891
R-HSA-5620924	Intraflagellar transport	2	56	0.00400486	0.460411	0.707381	6	12	0.00101798	-2.28958	9606	Homo sapiens	TUBB4B		R-HSA-5624949;R-HSA-5625424;R-HSA-5625426;R-HSA-5625421;R-HSA-5624952;R-HSA-5625416
R-HSA-452723	Transcriptional regulation of pluripotent stem cells	2	57	0.00407638	0.469502	0.707381	28	35	0.00296912	-3.80857	9606	Homo sapiens	sox2		R-HSA-2972975;R-HSA-480515;R-HSA-2972965;R-HSA-452750;R-HSA-2972964;R-HSA-2972967;R-HSA-480204;R-HSA-2972966;R-HSA-2972960;R-HSA-2972962;R-HSA-480470;R-HSA-452894;R-HSA-452958;R-HSA-452701;R-HSA-2972977;R-HSA-2972979;R-HSA-2972978;R-HSA-6800120;R-HSA-452838;R-HSA-452515;R-HSA-480685;R-HSA-452392;R-HSA-1112609;R-HSA-2972956;R-HSA-452338;R-HSA-2972949;R-HSA-2972948;R-HSA-480509
R-HSA-194002	Glucocorticoid biosynthesis	1	23	0.00164485	0.472037	0.707381	2	8	0.000678656	-5.28171	9606	Homo sapiens	hsd3b1		R-HSA-196372;R-HSA-193961
R-HSA-844456	The NLRP3 inflammasome	1	23	0.00164485	0.472037	0.707381	3	18	0.00152698	-2.18713	9606	Homo sapiens	txn		R-HSA-1250280;R-HSA-1250264;R-HSA-1250253
R-HSA-8849932	Synaptic adhesion-like molecules	1	23	0.00164485	0.472037	0.707381	1	8	0.000678656	-1.28076	9606	Homo sapiens	ptprfb		R-HSA-8855648
R-HSA-6794362	Protein-protein interactions at synapses	3	93	0.00665093	0.477168	0.707381	14	33	0.00279946	-1.95632	9606	Homo sapiens	ptprfb;nrxn3a		R-HSA-6794338;R-HSA-8855648;R-HSA-6797568;R-HSA-6794348;R-HSA-6794346;R-HSA-6794345;R-HSA-6794344;R-HSA-6797974;R-HSA-6794357;R-HSA-6798258;R-HSA-6797554;R-HSA-6794353;R-HSA-6794352;R-HSA-388824
R-HSA-109704	PI3K Cascade	2	58	0.00414789	0.478502	0.707381	1	6	0.000508992	-3.43902	9606	Homo sapiens	fgf4;fgf10a		R-HSA-109699
R-HSA-5654710	PI-3K cascade:FGFR3	1	24	0.00171637	0.486509	0.707381	6	7	0.000593824	-3.48584	9606	Homo sapiens	fgf4		R-HSA-5654709;R-HSA-5654643;R-HSA-5654640;R-HSA-5654641;R-HSA-5654705;R-HSA-5654637
R-HSA-937041	IKK complex recruitment mediated by RIP1	1	24	0.00171637	0.486509	0.707381	1	3	0.000254496	-3.93616	9606	Homo sapiens	sarm1		R-HSA-168921
R-HSA-9018896	Biosynthesis of E-series 18(S)-resolvins	1	24	0.00171637	0.486509	0.707381	1	9	0.000763488	-2.32393	9606	Homo sapiens	alox12		R-HSA-9020610
R-HSA-2243919	Crosslinking of collagen fibrils	1	24	0.00171637	0.486509	0.707381	1	13	0.00110282	-2.553	9606	Homo sapiens	col4a5		R-HSA-2559639
R-HSA-6794361	Neurexins and neuroligins	2	60	0.00429092	0.496219	0.707381	11	19	0.00161181	-2.29411	9606	Homo sapiens	nrxn3a		R-HSA-6797974;R-HSA-6794357;R-HSA-6797554;R-HSA-6794338;R-HSA-6794353;R-HSA-6794352;R-HSA-6797568;R-HSA-6794348;R-HSA-6794346;R-HSA-6794345;R-HSA-6794344
R-HSA-5339562	Uptake and actions of bacterial toxins	2	60	0.00429092	0.496219	0.707381	2	65	0.00551408	-4.2787	9606	Homo sapiens	star;eef2l2		R-HSA-5336421;R-HSA-8936356
R-HSA-5654704	SHC-mediated cascade:FGFR3	1	25	0.00178789	0.500586	0.707381	4	4	0.000339328	-3.48584	9606	Homo sapiens	fgf4		R-HSA-5654646;R-HSA-5654647;R-HSA-5654625;R-HSA-5654634
R-HSA-5654720	PI-3K cascade:FGFR4	1	25	0.00178789	0.500586	0.707381	6	7	0.000593824	-3.48584	9606	Homo sapiens	fgf4		R-HSA-5654662;R-HSA-5654659;R-HSA-5654669;R-HSA-5654717;R-HSA-5654714;R-HSA-5654667
R-HSA-196108	Pregnenolone biosynthesis	1	25	0.00178789	0.500586	0.707381	2	9	0.000763488	-9.44803	9606	Homo sapiens	star		R-HSA-196086;R-HSA-196126
R-HSA-71288	Creatine metabolism	1	25	0.00178789	0.500586	0.707381	1	6	0.000508992	0.690786	9606	Homo sapiens	ckmb		R-HSA-200318
R-HSA-162594	Early Phase of HIV Life Cycle	1	25	0.00178789	0.500586	0.707381	6	38	0.00322362	-3.83223	9606	Homo sapiens	cxcr4a		R-HSA-164515;R-HSA-164500;R-HSA-164507;R-HSA-164521;R-HSA-164524;R-HSA-164508
R-HSA-432722	Golgi Associated Vesicle Biogenesis	2	61	0.00436244	0.504933	0.707381	5	7	0.000593824	-1.71341	9606	Homo sapiens	vamp8;ap1s3b		R-HSA-421831;R-HSA-421836;R-HSA-434362;R-HSA-421835;R-HSA-421833
R-HSA-5654736	Signaling by FGFR1	2	61	0.00436244	0.504933	0.707381	31	48	0.00407194	-3.43902	9606	Homo sapiens	fgf4;fgf10a		R-HSA-5654167;R-HSA-5654165;R-HSA-5654672;R-HSA-5654673;R-HSA-5654596;R-HSA-5654597;R-HSA-5654149;R-HSA-5654594;R-HSA-5656064;R-HSA-5654592;R-HSA-190427;R-HSA-5654600;R-HSA-190429;R-HSA-5654582;R-HSA-5654578;R-HSA-190245;R-HSA-5654591;R-HSA-5654586;R-HSA-5654587;R-HSA-5654584;R-HSA-5654392;R-HSA-5654692;R-HSA-190256;R-HSA-5654690;R-HSA-5654560;R-HSA-5654511;R-HSA-5654575;R-HSA-5654573;R-HSA-56545…
R-HSA-5610780	Degradation of GLI1 by the proteasome	2	62	0.00443396	0.513548	0.707381	5	6	0.000508992	-0.351354	9606	Homo sapiens	gli1;psme4a		R-HSA-5610741;R-HSA-5610758;R-HSA-5610742;R-HSA-5610737;R-HSA-5610760
R-HSA-5655253	Signaling by FGFR2 in disease	2	62	0.00443396	0.513548	0.707381	16	28	0.0023753	-3.43902	9606	Homo sapiens	fgf4;fgf10a		R-HSA-5654748;R-HSA-5655323;R-HSA-5655320;R-HSA-2077424;R-HSA-2033488;R-HSA-2033486;R-HSA-5655268;R-HSA-2077421;R-HSA-5655301;R-HSA-5655233;R-HSA-5655343;R-HSA-5655245;R-HSA-5655339;R-HSA-2033474;R-HSA-5655241;R-HSA-2033472
R-HSA-5654706	FRS-mediated FGFR3 signaling	1	26	0.0018594	0.514278	0.707381	9	9	0.000763488	-3.48584	9606	Homo sapiens	fgf4		R-HSA-5654631;R-HSA-5654628;R-HSA-8941628;R-HSA-5654416;R-HSA-5654623;R-HSA-5654413;R-HSA-5654408;R-HSA-5654633;R-HSA-5654409
R-HSA-5654719	SHC-mediated cascade:FGFR4	1	26	0.0018594	0.514278	0.707381	4	4	0.000339328	-3.48584	9606	Homo sapiens	fgf4		R-HSA-5654423;R-HSA-5654428;R-HSA-5654426;R-HSA-5654425
R-HSA-8876384	Listeria monocytogenes entry into host cells	1	26	0.0018594	0.514278	0.707381	5	13	0.00110282	-1.50871	9606	Homo sapiens	cdh1		R-HSA-8876948;R-HSA-8876497;R-HSA-8876993;R-HSA-112333;R-HSA-8877003
R-HSA-2033514	FGFR3 mutant receptor activation	1	26	0.0018594	0.514278	0.707381	3	9	0.000763488	-3.48584	9606	Homo sapiens	fgf4		R-HSA-2077420;R-HSA-2012074;R-HSA-2012073
R-HSA-210991	Basigin interactions	1	26	0.0018594	0.514278	0.707381	1	10	0.00084832	-5.1198	9606	Homo sapiens	zgc:158423		R-HSA-375131
R-HSA-3322077	Glycogen synthesis	1	26	0.0018594	0.514278	0.707381	1	22	0.0018663	-0.722599	9606	Homo sapiens	ugp2b		R-HSA-70286
R-HSA-6811436	COPI-independent Golgi-to-ER retrograde traffic	2	63	0.00450547	0.522065	0.707381	2	7	0.000593824	-2.28958	9606	Homo sapiens	TUBB4B		R-HSA-8849350;R-HSA-8849353
R-HSA-977443	GABA receptor activation	2	63	0.00450547	0.522065	0.707381	1	10	0.00084832	-5.75458	9606	Homo sapiens	kcnj16;KCNJ15		R-HSA-1013020
R-HSA-9012852	Signaling by NOTCH3	2	63	0.00450547	0.522065	0.707381	1	37	0.00313879	0.693764	9606	Homo sapiens	hey2		R-HSA-9014141
R-HSA-5654712	FRS-mediated FGFR4 signaling	1	27	0.00193092	0.527596	0.707381	9	9	0.000763488	-3.48584	9606	Homo sapiens	fgf4		R-HSA-5654422;R-HSA-5654663;R-HSA-5654658;R-HSA-5654418;R-HSA-8941613;R-HSA-5654655;R-HSA-5654653;R-HSA-5654651;R-HSA-5654664
R-HSA-193048	Androgen biosynthesis	1	27	0.00193092	0.527596	0.707381	1	7	0.000593824	-5.28171	9606	Homo sapiens	hsd3b1		R-HSA-193073
R-HSA-5652084	Fructose metabolism	1	27	0.00193092	0.527596	0.707381	1	7	0.000593824	-2.58147	9606	Homo sapiens	sord		R-HSA-5652195
R-HSA-112399	IRS-mediated signalling	2	64	0.00457699	0.530481	0.707381	1	9	0.000763488	-3.43902	9606	Homo sapiens	fgf4;fgf10a		R-HSA-109699
R-HSA-6809371	Formation of the cornified envelope	4	138	0.00986913	0.533311	0.707381	9	27	0.00229046	-2.3668	9606	Homo sapiens	krt17;pkp3a		R-HSA-6814695;R-HSA-6810357;R-HSA-6814387;R-HSA-6811539;R-HSA-8942224;R-HSA-6814734;R-HSA-6814764;R-HSA-6814298;R-HSA-6810937
R-HSA-3299685	Detoxification of Reactive Oxygen Species	2	65	0.0046485	0.538795	0.707381	4	34	0.00288429	-1.88815	9606	Homo sapiens	gstp1;txn		R-HSA-3697882;R-HSA-3343700;R-HSA-3341343;R-HSA-73646
R-HSA-6791312	TP53 Regulates Transcription of Cell Cycle Genes	2	65	0.0046485	0.538795	0.707381	2	42	0.00356295	-1.56531	9606	Homo sapiens	rgcc		R-HSA-6803917;R-HSA-6803914
R-HSA-3238698	WNT ligand biogenesis and trafficking	1	28	0.00200243	0.540549	0.707381	8	12	0.00101798	-4.46811	9606	Homo sapiens	wnt2		R-HSA-3247840;R-HSA-3238691;R-HSA-3247843;R-HSA-3247844;R-HSA-3238694;R-HSA-3247837;R-HSA-3781941;R-HSA-3781943
R-HSA-200425	Import of palmitoyl-CoA into the mitochondrial matrix	1	28	0.00200243	0.540549	0.707381	1	9	0.000763488	-5.90603	9606	Homo sapiens	slc22a21		R-HSA-165026
R-HSA-8964038	LDL clearance	1	28	0.00200243	0.540549	0.707381	1	19	0.00161181	-2.11038	9606	Homo sapiens	lsr		R-HSA-8933258
R-HSA-982772	Growth hormone receptor signaling	1	29	0.00207395	0.553148	0.707381	15	28	0.0023753	0.730084	9606	Homo sapiens	ghrb		R-HSA-1362485;R-HSA-1168789;R-HSA-982792;R-HSA-1168767;R-HSA-1168768;R-HSA-982778;R-HSA-982810;R-HSA-1362465;R-HSA-1168423;R-HSA-1168777;R-HSA-1168456;R-HSA-982775;R-HSA-982807;R-HSA-1168459;R-HSA-982768
R-HSA-164952	The role of Nef in HIV-1 replication and disease pathogenesis	1	29	0.00207395	0.553148	0.707381	3	20	0.00169664	-2.164	9606	Homo sapiens	ap1s3b		R-HSA-182263;R-HSA-182279;R-HSA-182286
R-HSA-352230	Amino acid transport across the plasma membrane	2	68	0.00486305	0.563124	0.707381	7	36	0.00305395	-5.03006	9606	Homo sapiens	zgc:158423;slc6a14		R-HSA-379415;R-HSA-378513;R-HSA-379426;R-HSA-375487;R-HSA-352191;R-HSA-376200;R-HSA-352232
R-HSA-983189	Kinesins	2	68	0.00486305	0.563124	0.707381	2	14	0.00118765	-2.28958	9606	Homo sapiens	TUBB4B		R-HSA-983259;R-HSA-983266
R-HSA-2428928	IRS-related events triggered by IGF1R	2	68	0.00486305	0.563124	0.707381	1	11	0.000933152	-3.43902	9606	Homo sapiens	fgf4;fgf10a		R-HSA-109699
R-HSA-190236	Signaling by FGFR	3	106	0.00758063	0.564346	0.707381	115	142	0.0120461	-4.48454	9606	Homo sapiens	fgf4;fgf10a;fgfbp1b		R-HSA-5654614;R-HSA-5654615;R-HSA-5654612;R-HSA-5654608;R-HSA-5654622;R-HSA-5654623;R-HSA-5654620;R-HSA-5654618;R-HSA-5654596;R-HSA-5654597;R-HSA-5654594;R-HSA-5654592;R-HSA-5654607;R-HSA-5654605;R-HSA-5654603;R-HSA-5654600;R-HSA-5654646;R-HSA-5654647;R-HSA-5654643;R-HSA-5654640;R-HSA-190245;R-HSA-5654641;R-HSA-5654399;R-HSA-5654655;R-HSA-5654397;R-HSA-5654653;R-HSA-5654651;R-HSA-5654392;R-HSA-19…
R-HSA-8939236	RUNX1 regulates transcription of genes involved in differentiation of HSCs	3	106	0.00758063	0.564346	0.707381	4	15	0.00127248	-1.17045	9606	Homo sapiens	lmo1;gata3;psme4a		R-HSA-8956568;R-HSA-8956586;R-HSA-8956608;R-HSA-8957265
R-HSA-201451	Signaling by BMP	1	30	0.00214546	0.565402	0.707381	8	17	0.00144214	-2.10085	9606	Homo sapiens	bmp2b		R-HSA-201475;R-HSA-201443;R-HSA-201810;R-HSA-201457;R-HSA-201648;R-HSA-201476;R-HSA-201821;R-HSA-201453
R-HSA-5218921	VEGFR2 mediated cell proliferation	1	30	0.00214546	0.565402	0.707381	1	12	0.00101798	-2.21048	9606	Homo sapiens	ahcyl1		R-HSA-169683
R-HSA-196071	Metabolism of steroid hormones	2	69	0.00493456	0.571027	0.707381	7	37	0.00313879	-7.36487	9606	Homo sapiens	hsd3b1;star		R-HSA-193073;R-HSA-196086;R-HSA-196372;R-HSA-193961;R-HSA-196126;R-HSA-196350;R-HSA-193052
R-HSA-1442490	Collagen degradation	2	69	0.00493456	0.571027	0.707381	4	34	0.00288429	-1.86622	9606	Homo sapiens	col4a5;col6a1		R-HSA-1454757;R-HSA-1564112;R-HSA-1564142;R-HSA-2537499
R-HSA-163841	Gamma carboxylation, hypusine formation and arylsulfatase activation	2	69	0.00493456	0.571027	0.707381	4	39	0.00330845	-3.829	9606	Homo sapiens	arsj;f2		R-HSA-159826;R-HSA-159843;R-HSA-159728;R-HSA-1614362
R-HSA-375165	NCAM signaling for neurite out-growth	2	69	0.00493456	0.571027	0.707381	1	23	0.00195114	-1.86622	9606	Homo sapiens	col4a5;col6a1		R-HSA-375151
R-HSA-3296469	Defects in cobalamin (B12) metabolism	1	31	0.00221698	0.577321	0.707381	2	16	0.00135731	-6.12304	9606	Homo sapiens	cubn		R-HSA-3296462;R-HSA-3296477
R-HSA-70921	Histidine catabolism	1	31	0.00221698	0.577321	0.707381	1	8	0.000678656	-5.75001	9606	Homo sapiens	ftcd		R-HSA-70920
R-HSA-1482801	Acyl chain remodelling of PS	1	31	0.00221698	0.577321	0.707381	1	8	0.000678656	0.886309	9606	Homo sapiens	pla1a		R-HSA-8869425
R-HSA-1187000	Fertilization	1	31	0.00221698	0.577321	0.707381	1	9	0.000763488	-3.35654	9606	Homo sapiens	zgc:174164		R-HSA-1297338
R-HSA-373755	Semaphorin interactions	2	70	0.00500608	0.578826	0.707381	17	40	0.00339328	-2.40897	9606	Homo sapiens	plxna4;sema7a		R-HSA-399942;R-HSA-399941;R-HSA-399939;R-HSA-434990;R-HSA-399951;R-HSA-434989;R-HSA-399946;R-HSA-399947;R-HSA-399944;R-HSA-416723;R-HSA-399952;R-HSA-399934;R-HSA-399935;R-HSA-399933;R-HSA-399930;R-HSA-399931;R-HSA-399928
R-HSA-3371497	HSP90 chaperone cycle for steroid hormone receptors (SHR)	2	70	0.00500608	0.578826	0.707381	1	12	0.00101798	-2.28958	9606	Homo sapiens	TUBB4B		R-HSA-5618080
R-HSA-8957275	Post-translational protein phosphorylation	3	109	0.00779518	0.583174	0.707381	1	1	8.4832e-05	-2.74836	9606	Homo sapiens	vwa1;bmp2b;tfa		R-HSA-8952289
R-HSA-8856825	Cargo recognition for clathrin-mediated endocytosis	3	109	0.00779518	0.583174	0.707381	4	14	0.00118765	-2.24697	9606	Homo sapiens	dab2;vamp8;tfa		R-HSA-8866277;R-HSA-8863472;R-HSA-8863471;R-HSA-8867613
R-HSA-380284	Loss of proteins required for interphase microtubule organization from the centrosome	2	71	0.00507759	0.586521	0.707381	3	3	0.000254496	-2.28958	9606	Homo sapiens	TUBB4B		R-HSA-380294;R-HSA-380272;R-HSA-380303
R-HSA-380259	Loss of Nlp from mitotic centrosomes	2	71	0.00507759	0.586521	0.707381	2	2	0.000169664	-2.28958	9606	Homo sapiens	TUBB4B		R-HSA-380272;R-HSA-380303
R-HSA-2428924	IGF1R signaling cascade	2	71	0.00507759	0.586521	0.707381	1	16	0.00135731	-3.43902	9606	Homo sapiens	fgf4;fgf10a		R-HSA-109699
R-HSA-74751	Insulin receptor signalling cascade	2	71	0.00507759	0.586521	0.707381	1	25	0.0021208	-3.43902	9606	Homo sapiens	fgf4;fgf10a		R-HSA-109699
R-HSA-2132295	MHC class II antigen presentation	4	148	0.0105843	0.588212	0.707381	8	26	0.00220563	-2.00881	9606	Homo sapiens	ap1s3b;TUBB4B;ctsla		R-HSA-2130641;R-HSA-2213248;R-HSA-2130706;R-HSA-8951498;R-HSA-2213236;R-HSA-2130504;R-HSA-2130619;R-HSA-2130349
R-HSA-210500	Glutamate Neurotransmitter Release Cycle	1	32	0.00228849	0.588914	0.707381	1	8	0.000678656	0.704032	9606	Homo sapiens	gls2b		R-HSA-70609
R-HSA-70635	Urea cycle	1	32	0.00228849	0.588914	0.707381	1	8	0.000678656	-2.97759	9606	Homo sapiens	ASS1		R-HSA-70577
R-HSA-2046105	Linoleic acid (LA) metabolism	1	32	0.00228849	0.588914	0.707381	1	10	0.00084832	-1.7921	9606	Homo sapiens	elovl1a		R-HSA-2046094
R-HSA-174178	APC/C:Cdh1 mediated degradation of Cdc20 and other APC/C:Cdh1 targeted proteins in late mitosis/early G1	2	72	0.00514911	0.594111	0.707381	4	4	0.000339328	-0.306724	9606	Homo sapiens	cdh1;psme4a		R-HSA-174195;R-HSA-174088;R-HSA-174105;R-HSA-188191
R-HSA-5358346	Hedgehog ligand biogenesis	2	72	0.00514911	0.594111	0.707381	4	15	0.00127248	-1.56198	9606	Homo sapiens	shha;psme4a		R-HSA-5358336;R-HSA-5362448;R-HSA-5362386;R-HSA-5358340
R-HSA-156584	Cytosolic sulfonation of small molecules	2	72	0.00514911	0.594111	0.707381	3	24	0.00203597	-2.71971	9606	Homo sapiens	sult6b1;slc26a1		R-HSA-427555;R-HSA-176474;R-HSA-176585
R-HSA-2404192	Signaling by Type 1 Insulin-like Growth Factor 1 Receptor (IGF1R)	2	72	0.00514911	0.594111	0.707381	1	18	0.00152698	-3.43902	9606	Homo sapiens	fgf4;fgf10a		R-HSA-109699
R-HSA-3928663	EPHA-mediated growth cone collapse	1	33	0.00236001	0.60019	0.707381	3	4	0.000339328	-1.66512	9606	Homo sapiens	epha3		R-HSA-3928651;R-HSA-3928602;R-HSA-3928648
R-HSA-9018679	Biosynthesis of EPA-derived SPMs	1	33	0.00236001	0.60019	0.707381	2	17	0.00144214	-2.32393	9606	Homo sapiens	alox12		R-HSA-9018907;R-HSA-9020610
R-HSA-622312	Inflammasomes	1	33	0.00236001	0.60019	0.707381	3	28	0.0023753	-2.18713	9606	Homo sapiens	txn		R-HSA-1250280;R-HSA-1250264;R-HSA-1250253
R-HSA-8854518	AURKA Activation by TPX2	2	74	0.00529214	0.608978	0.707381	2	2	0.000169664	-2.28958	9606	Homo sapiens	TUBB4B		R-HSA-8853405;R-HSA-8853419
R-HSA-69017	CDK-mediated phosphorylation and removal of Cdc6	2	74	0.00529214	0.608978	0.707381	2	4	0.000339328	-0.306724	9606	Homo sapiens	cdh1;psme4a		R-HSA-69015;R-HSA-69016
R-HSA-5654708	Downstream signaling of activated FGFR3	1	34	0.00243152	0.611157	0.707381	22	23	0.00195114	-3.48584	9606	Homo sapiens	fgf4		R-HSA-5654646;R-HSA-5654647;R-HSA-5654709;R-HSA-5654643;R-HSA-5654224;R-HSA-5654640;R-HSA-5654416;R-HSA-5654641;R-HSA-5654705;R-HSA-5654623;R-HSA-5654631;R-HSA-5654148;R-HSA-5654628;R-HSA-8941628;R-HSA-5654625;R-HSA-5654222;R-HSA-5654637;R-HSA-5654413;R-HSA-5654634;R-HSA-5654408;R-HSA-5654633;R-HSA-5654409
R-HSA-5654732	Negative regulation of FGFR3 signaling	1	34	0.00243152	0.611157	0.707381	3	14	0.00118765	-3.48584	9606	Homo sapiens	fgf4		R-HSA-5654679;R-HSA-5654565;R-HSA-5654730
R-HSA-8940973	RUNX2 regulates osteoblast differentiation	1	34	0.00243152	0.611157	0.707381	1	24	0.00203597	0.693764	9606	Homo sapiens	hey2		R-HSA-9008177
R-HSA-5654716	Downstream signaling of activated FGFR4	1	35	0.00250304	0.621824	0.707381	22	23	0.00195114	-3.48584	9606	Homo sapiens	fgf4		R-HSA-5654422;R-HSA-5654423;R-HSA-5654418;R-HSA-5654163;R-HSA-8941613;R-HSA-5654655;R-HSA-5654428;R-HSA-5654717;R-HSA-5654653;R-HSA-5654714;R-HSA-5654426;R-HSA-5654651;R-HSA-5654169;R-HSA-5654425;R-HSA-5654662;R-HSA-5654151;R-HSA-5654663;R-HSA-5654658;R-HSA-5654659;R-HSA-5654669;R-HSA-5654667;R-HSA-5654664
R-HSA-5654733	Negative regulation of FGFR4 signaling	1	35	0.00250304	0.621824	0.707381	3	14	0.00118765	-3.48584	9606	Homo sapiens	fgf4		R-HSA-5654566;R-HSA-5654734;R-HSA-5654684
R-HSA-418990	Adherens junctions interactions	1	35	0.00250304	0.621824	0.707381	2	16	0.00135731	-1.50871	9606	Homo sapiens	cdh1		R-HSA-419002;R-HSA-419001
R-HSA-456926	Thrombin signalling through proteinase activated receptors (PARs)	1	35	0.00250304	0.621824	0.707381	1	14	0.00118765	-4.20427	9606	Homo sapiens	f2		R-HSA-114697
R-HSA-1650814	Collagen biosynthesis and modifying enzymes	2	76	0.00543517	0.623428	0.707381	22	51	0.00432643	-1.86622	9606	Homo sapiens	col4a5;col6a1		R-HSA-8948232;R-HSA-8944265;R-HSA-1650808;R-HSA-2002460;R-HSA-8948234;R-HSA-1614460;R-HSA-1614461;R-HSA-2022073;R-HSA-8948224;R-HSA-8948226;R-HSA-2089971;R-HSA-8948228;R-HSA-1981104;R-HSA-8948230;R-HSA-8948231;R-HSA-8948219;R-HSA-8948222;R-HSA-1981128;R-HSA-1980233;R-HSA-1981157;R-HSA-1981120;R-HSA-8944247
R-HSA-9008059	Interleukin-37 signaling	1	36	0.00257455	0.6322	0.707381	3	14	0.00118765	-3.80806	9606	Homo sapiens	sigirr		R-HSA-9008684;R-HSA-9008577;R-HSA-9009072
R-HSA-392154	Nitric oxide stimulates guanylate cyclase	1	36	0.00257455	0.6322	0.707381	1	7	0.000593824	-3.03802	9606	Homo sapiens	kcnma1a		R-HSA-418549
R-HSA-5223345	Miscellaneous transport and binding events	1	36	0.00257455	0.6322	0.707381	1	13	0.00110282	-3.77093	9606	Homo sapiens	nipal4		R-HSA-5336453
R-HSA-1445148	Translocation of SLC2A4 (GLUT4) to the plasma membrane	2	79	0.00564972	0.644324	0.707381	1	15	0.00127248	-2.28958	9606	Homo sapiens	TUBB4B		R-HSA-2316347
R-HSA-199992	trans-Golgi Network Vesicle Budding	2	80	0.00572123	0.651083	0.707381	11	19	0.00161181	-1.71341	9606	Homo sapiens	vamp8;ap1s3b		R-HSA-421831;R-HSA-432706;R-HSA-432707;R-HSA-432688;R-HSA-376364;R-HSA-421836;R-HSA-5333658;R-HSA-434362;R-HSA-421835;R-HSA-432712;R-HSA-421833
R-HSA-421837	Clathrin derived vesicle budding	2	80	0.00572123	0.651083	0.707381	11	19	0.00161181	-1.71341	9606	Homo sapiens	vamp8;ap1s3b		R-HSA-421831;R-HSA-432706;R-HSA-432707;R-HSA-432688;R-HSA-376364;R-HSA-421836;R-HSA-5333658;R-HSA-434362;R-HSA-421835;R-HSA-432712;R-HSA-421833
R-HSA-8939902	Regulation of RUNX2 expression and activity	2	80	0.00572123	0.651083	0.707381	3	32	0.00271463	-0.602795	9606	Homo sapiens	bmp2b;psme4a		R-HSA-9007707;R-HSA-9008110;R-HSA-9009362
R-HSA-170822	Regulation of Glucokinase by Glucokinase Regulatory Protein	1	38	0.00271759	0.652106	0.707381	5	5	0.00042416	0.694976	9606	Homo sapiens	myl7		R-HSA-170810;R-HSA-170824;R-HSA-170825;R-HSA-170799;R-HSA-170796
R-HSA-111465	Apoptotic cleavage of cellular proteins	1	38	0.00271759	0.652106	0.707381	1	38	0.00322362	-1.50871	9606	Homo sapiens	cdh1		R-HSA-202939
R-HSA-380270	Recruitment of mitotic centrosome proteins and complexes	2	81	0.00579275	0.65774	0.707381	3	3	0.000254496	-2.28958	9606	Homo sapiens	TUBB4B		R-HSA-380311;R-HSA-380455;R-HSA-380283
R-HSA-445355	Smooth Muscle Contraction	1	39	0.0027891	0.661653	0.707381	5	9	0.000763488	0.694976	9606	Homo sapiens	myl7		R-HSA-445700;R-HSA-445813;R-HSA-445699;R-HSA-445704;R-HSA-445705
R-HSA-917977	Transferrin endocytosis and recycling	1	39	0.0027891	0.661653	0.707381	6	11	0.000933152	-3.08489	9606	Homo sapiens	tfa		R-HSA-917839;R-HSA-917807;R-HSA-917835;R-HSA-917814;R-HSA-5691150;R-HSA-917987
R-HSA-4791275	Signaling by WNT in cancer	1	39	0.0027891	0.661653	0.707381	1	16	0.00135731	-1.2062	9606	Homo sapiens	tcf7l2		R-HSA-5334052
R-HSA-176408	Regulation of APC/C activators between G1/S and early anaphase	2	82	0.00586426	0.664295	0.707381	10	14	0.00118765	-0.306724	9606	Homo sapiens	cdh1;psme4a		R-HSA-188371;R-HSA-174209;R-HSA-174097;R-HSA-174122;R-HSA-174203;R-HSA-174251;R-HSA-174139;R-HSA-174174;R-HSA-174159;R-HSA-174079
R-HSA-5619115	Disorders of transmembrane transporters	6	243	0.0173782	0.667334	0.707381	7	88	0.00746522	-4.33281	9606	Homo sapiens	slc5a2;myl7;slc22a21;slc34a1a;slc6a14;psme4a		R-HSA-5651685;R-HSA-5661474;R-HSA-5658163;R-HSA-5621918;R-HSA-5659674;R-HSA-8866858;R-HSA-5625674
R-HSA-380287	Centrosome maturation	2	83	0.00593578	0.670749	0.707381	6	6	0.000508992	-2.28958	9606	Homo sapiens	TUBB4B		R-HSA-380311;R-HSA-380455;R-HSA-380294;R-HSA-380272;R-HSA-380303;R-HSA-380283
R-HSA-8853338	Signaling by FGFR3 point mutants in cancer	1	40	0.00286062	0.670938	0.707381	13	19	0.00161181	-3.48584	9606	Homo sapiens	fgf4		R-HSA-5655285;R-HSA-5655315;R-HSA-5655262;R-HSA-5655295;R-HSA-5655289;R-HSA-5655270;R-HSA-2077420;R-HSA-2012074;R-HSA-2012073;R-HSA-5655247;R-HSA-5655244;R-HSA-5655277;R-HSA-5655243
R-HSA-5655332	Signaling by FGFR3 in disease	1	40	0.00286062	0.670938	0.707381	13	28	0.0023753	-3.48584	9606	Homo sapiens	fgf4		R-HSA-5655285;R-HSA-5655315;R-HSA-5655262;R-HSA-5655295;R-HSA-5655289;R-HSA-5655270;R-HSA-2077420;R-HSA-2012074;R-HSA-2012073;R-HSA-5655247;R-HSA-5655244;R-HSA-5655277;R-HSA-5655243
R-HSA-2559585	Oncogene Induced Senescence	1	42	0.00300365	0.688753	0.707381	2	18	0.00152698	-0.997	9606	Homo sapiens	id1		R-HSA-8979082;R-HSA-3209165
R-HSA-3296482	Defects in vitamin and cofactor metabolism	1	42	0.00300365	0.688753	0.707381	2	22	0.0018663	-6.12304	9606	Homo sapiens	cubn		R-HSA-3296462;R-HSA-3296477
R-HSA-6785807	Interleukin-4 and Interleukin-13 signaling	5	211	0.0150898	0.697021	0.707381	3	46	0.00390227	-2.64168	9606	Homo sapiens	sox2;gata3;alox12		R-HSA-6793975;R-HSA-6797269;R-HSA-6790036
R-HSA-381771	Synthesis, secretion, and inactivation of Glucagon-like Peptide-1 (GLP-1)	1	43	0.00307516	0.697296	0.707381	1	7	0.000593824	-1.2062	9606	Homo sapiens	tcf7l2		R-HSA-381799
R-HSA-8941326	RUNX2 regulates bone development	1	43	0.00307516	0.697296	0.707381	1	32	0.00271463	0.693764	9606	Homo sapiens	hey2		R-HSA-9008177
R-HSA-8982491	Glycogen metabolism	1	43	0.00307516	0.697296	0.707381	1	37	0.00313879	-0.722599	9606	Homo sapiens	ugp2b		R-HSA-70286
R-HSA-74217	Purine salvage	1	44	0.00314668	0.705606	0.707381	1	11	0.000933152	0.738148	9606	Homo sapiens	ampd3b		R-HSA-76590
R-HSA-1839124	FGFR1 mutant receptor activation	1	44	0.00314668	0.705606	0.707381	2	25	0.0021208	-3.48584	9606	Homo sapiens	fgf4		R-HSA-2023455;R-HSA-2023451
R-HSA-1226099	Signaling by FGFR in disease	2	89	0.00636487	0.707381	0.707381	41	106	0.0089922	-3.43902	9606	Homo sapiens	fgf4;fgf10a		R-HSA-2023455;R-HSA-2023451;R-HSA-5655315;R-HSA-5655326;R-HSA-5655262;R-HSA-5655263;R-HSA-5654748;R-HSA-5655323;R-HSA-5655320;R-HSA-2033488;R-HSA-2033486;R-HSA-5655301;R-HSA-5655233;R-HSA-5655247;R-HSA-5655244;R-HSA-5655245;R-HSA-2033474;R-HSA-5655243;R-HSA-5655240;R-HSA-5655241;R-HSA-2033472;R-HSA-1839100;R-HSA-5655285;R-HSA-1839098;R-HSA-5655295;R-HSA-1839094;R-HSA-5655290;R-HSA-2077424;R-HSA-5…
R-HSA-9018677	Biosynthesis of DHA-derived SPMs	2	89	0.00636487	0.707381	0.707381	6	58	0.00492026	-2.32393	9606	Homo sapiens	alox12		R-HSA-9024872;R-HSA-9024881;R-HSA-9020275;R-HSA-9020274;R-HSA-9024983;R-HSA-9020262
R-HSA-425407	SLC-mediated transmembrane transport	10	412	0.0294643	0.708124	0.708124	16	184	0.0156091	-5.98163	9606	Homo sapiens	slc5a2;slc5a12;slc20a1a;slc22a21;slc2a12;slc34a1a;slc26a1;zgc:158423;slc6a14		R-HSA-429094;R-HSA-427555;R-HSA-379426;R-HSA-429613;R-HSA-376200;R-HSA-352232;R-HSA-427656;R-HSA-549241;R-HSA-379415;R-HSA-427605;R-HSA-378513;R-HSA-549297;R-HSA-375487;R-HSA-352191;R-HSA-189208;R-HSA-8876312
R-HSA-453276	Regulation of mitotic cell cycle	2	90	0.00643639	0.713145	0.713145	20	38	0.00322362	-0.306724	9606	Homo sapiens	cdh1;psme4a		R-HSA-174209;R-HSA-174122;R-HSA-174058;R-HSA-174251;R-HSA-174088;R-HSA-174057;R-HSA-174255;R-HSA-174159;R-HSA-174124;R-HSA-174195;R-HSA-188371;R-HSA-174097;R-HSA-174070;R-HSA-174202;R-HSA-174203;R-HSA-174139;R-HSA-174105;R-HSA-174174;R-HSA-188191;R-HSA-174079
R-HSA-174143	APC/C-mediated degradation of cell cycle proteins	2	90	0.00643639	0.713145	0.713145	20	38	0.00322362	-0.306724	9606	Homo sapiens	cdh1;psme4a		R-HSA-174209;R-HSA-174122;R-HSA-174058;R-HSA-174251;R-HSA-174088;R-HSA-174057;R-HSA-174255;R-HSA-174159;R-HSA-174124;R-HSA-174195;R-HSA-188371;R-HSA-174097;R-HSA-174070;R-HSA-174202;R-HSA-174203;R-HSA-174139;R-HSA-174105;R-HSA-174174;R-HSA-188191;R-HSA-174079
R-HSA-195253	Degradation of beta-catenin by the destruction complex	2	90	0.00643639	0.713145	0.713145	6	22	0.0018663	-0.155471	9606	Homo sapiens	tcf7l2;psme4a		R-HSA-5334050;R-HSA-8944349;R-HSA-8944352;R-HSA-4641231;R-HSA-2130282;R-HSA-5229348
R-HSA-2046106	alpha-linolenic acid (ALA) metabolism	1	45	0.00321819	0.713688	0.713688	1	15	0.00127248	-1.7921	9606	Homo sapiens	elovl1a		R-HSA-2046088
R-HSA-1489509	DAG and IP3 signaling	1	45	0.00321819	0.713688	0.713688	1	19	0.00161181	-2.21048	9606	Homo sapiens	ahcyl1		R-HSA-169683
R-HSA-5173105	O-linked glycosylation	3	133	0.00951155	0.714325	0.714325	1	26	0.00220563	-2.81005	9606	Homo sapiens	galnt6;galnt14;galnt18b		R-HSA-913675
R-HSA-6802948	Signaling by high-kinase activity BRAF mutants	1	46	0.00328971	0.721548	0.721548	4	6	0.000508992	-2.50645	9606	Homo sapiens	cnksr1		R-HSA-6802912;R-HSA-6802911;R-HSA-6802910;R-HSA-6803227
R-HSA-2565942	Regulation of PLK1 Activity at G2/M Transition	2	92	0.00657942	0.724388	0.724388	4	12	0.00101798	-2.28958	9606	Homo sapiens	TUBB4B		R-HSA-3000319;R-HSA-2574845;R-HSA-3000310;R-HSA-2574840
R-HSA-69052	Switching of origins to a post-replicative state	2	92	0.00657942	0.724388	0.724388	3	9	0.000763488	-0.306724	9606	Homo sapiens	cdh1;psme4a		R-HSA-68948;R-HSA-69015;R-HSA-69016
R-HSA-9013694	Signaling by NOTCH4	2	92	0.00657942	0.724388	0.724388	1	20	0.00169664	0.693764	9606	Homo sapiens	hey2		R-HSA-9604553
R-HSA-400508	Incretin synthesis, secretion, and inactivation	1	47	0.00336122	0.729194	0.729194	1	14	0.00118765	-1.2062	9606	Homo sapiens	tcf7l2		R-HSA-381799
R-HSA-114608	Platelet degranulation	3	137	0.00979761	0.732772	0.732772	2	11	0.000933152	-4.00768	9606	Homo sapiens	plg;tfa;islr2		R-HSA-482770;R-HSA-481007
R-HSA-446728	Cell junction organization	2	94	0.00672245	0.735257	0.735257	6	37	0.00313879	-3.12782	9606	Homo sapiens	cdh1;lamc2		R-HSA-446083;R-HSA-432956;R-HSA-446077;R-HSA-419002;R-HSA-446089;R-HSA-419001
R-HSA-1614635	Sulfur amino acid metabolism	2	94	0.00672245	0.735257	0.735257	2	37	0.00313879	-2.035	9606	Homo sapiens	bhmt		R-HSA-5696838;R-HSA-1614654
R-HSA-6802946	Signaling by moderate kinase activity BRAF mutants	1	48	0.00343274	0.73663	0.73663	4	7	0.000593824	-2.50645	9606	Homo sapiens	cnksr1		R-HSA-6802919;R-HSA-6802914;R-HSA-6803230;R-HSA-6802921
R-HSA-4615885	SUMOylation of DNA replication proteins	1	48	0.00343274	0.73663	0.73663	3	8	0.000678656	0.808928	9606	Homo sapiens	top2a		R-HSA-4641350;R-HSA-5228525;R-HSA-4641342
R-HSA-71240	Tryptophan catabolism	1	48	0.00343274	0.73663	0.73663	1	16	0.00135731	-5.1198	9606	Homo sapiens	zgc:158423		R-HSA-352232
R-HSA-6802955	Paradoxical activation of RAF signaling by kinase inactive BRAF	1	49	0.00350426	0.743862	0.743862	4	7	0.000593824	-2.50645	9606	Homo sapiens	cnksr1		R-HSA-6802918;R-HSA-6803234;R-HSA-6802943;R-HSA-6802942
R-HSA-73817	Purine ribonucleoside monophosphate biosynthesis	1	49	0.00350426	0.743862	0.743862	2	17	0.00144214	-1.66752	9606	Homo sapiens	atic		R-HSA-73797;R-HSA-73798
R-HSA-196741	Cobalamin (Cbl, vitamin B12) transport and metabolism	1	49	0.00350426	0.743862	0.743862	2	30	0.00254496	-6.12304	9606	Homo sapiens	cubn		R-HSA-3000137;R-HSA-3000103
R-HSA-74752	Signaling by Insulin receptor	2	96	0.00686548	0.74576	0.74576	1	34	0.00288429	-3.43902	9606	Homo sapiens	fgf4;fgf10a		R-HSA-109699
R-HSA-380320	Recruitment of NuMA to mitotic centrosomes	2	97	0.00693699	0.750876	0.750876	2	2	0.000169664	-2.28958	9606	Homo sapiens	TUBB4B		R-HSA-380316;R-HSA-380508
R-HSA-5654743	Signaling by FGFR4	1	50	0.00357577	0.750896	0.750896	27	41	0.00347811	-3.48584	9606	Homo sapiens	fgf4		R-HSA-5654422;R-HSA-5654423;R-HSA-5654418;R-HSA-5654163;R-HSA-5654684;R-HSA-5654428;R-HSA-5654426;R-HSA-5654169;R-HSA-5654425;R-HSA-5654662;R-HSA-5654151;R-HSA-5654663;R-HSA-5654658;R-HSA-5654659;R-HSA-5654734;R-HSA-5654669;R-HSA-5654667;R-HSA-5654664;R-HSA-8941613;R-HSA-5654655;R-HSA-5654717;R-HSA-5654653;R-HSA-5654714;R-HSA-5654651;R-HSA-5654566;R-HSA-190326;R-HSA-190265
R-HSA-211733	Regulation of activated PAK-2p34 by proteasome mediated degradation	1	50	0.00357577	0.750896	0.750896	1	2	0.000169664	0.895261	9606	Homo sapiens	psme4a		R-HSA-211715
R-HSA-442660	Na+/Cl- dependent neurotransmitter transporters	1	50	0.00357577	0.750896	0.750896	1	15	0.00127248	-4.94032	9606	Homo sapiens	slc6a14		R-HSA-375487
R-HSA-174824	Plasma lipoprotein assembly, remodeling, and clearance	2	98	0.00700851	0.755904	0.755904	4	84	0.00712589	-4.11671	9606	Homo sapiens	cubn;lsr		R-HSA-8933258;R-HSA-264848;R-HSA-8933292;R-HSA-264834
R-HSA-75876	Synthesis of very long-chain fatty acyl-CoAs	1	51	0.00364729	0.757738	0.757738	2	12	0.00101798	-1.7921	9606	Homo sapiens	elovl1a		R-HSA-548830;R-HSA-548800
R-HSA-5620912	Anchoring of the basal body to the plasma membrane	2	99	0.00708003	0.760844	0.760844	8	9	0.000763488	-2.28958	9606	Homo sapiens	TUBB4B		R-HSA-5626228;R-HSA-5626227;R-HSA-5626220;R-HSA-5626223;R-HSA-5626681;R-HSA-5617816;R-HSA-5626699;R-HSA-5638009
R-HSA-2219530	Constitutive Signaling by Aberrant PI3K in Cancer	2	99	0.00708003	0.760844	0.760844	1	2	0.000169664	-3.43902	9606	Homo sapiens	fgf4;fgf10a		R-HSA-2400009
R-HSA-373080	Class B/2 (Secretin family receptors)	2	99	0.00708003	0.760844	0.760844	2	20	0.00169664	-3.11897	9606	Homo sapiens	wnt2;ptch2		R-HSA-445124;R-HSA-201708
R-HSA-76005	Response to elevated platelet cytosolic Ca2+	3	144	0.0102982	0.762783	0.762783	2	14	0.00118765	-4.00768	9606	Homo sapiens	plg;tfa;islr2		R-HSA-482770;R-HSA-481007
R-HSA-351202	Metabolism of polyamines	3	144	0.0102982	0.762783	0.762783	3	38	0.00322362	-0.463848	9606	Homo sapiens	ckmb;psme4a;ASS1		R-HSA-353125;R-HSA-70577;R-HSA-200318
R-HSA-8878166	Transcriptional regulation by RUNX2	3	144	0.0102982	0.762783	0.762783	5	84	0.00712589	-0.170609	9606	Homo sapiens	hey2;bmp2b;psme4a		R-HSA-9007707;R-HSA-9008110;R-HSA-9008177;R-HSA-9008832;R-HSA-9009362
R-HSA-5654741	Signaling by FGFR3	1	52	0.0037188	0.764392	0.764392	27	43	0.00364778	-3.48584	9606	Homo sapiens	fgf4		R-HSA-5654679;R-HSA-5654224;R-HSA-5654416;R-HSA-5654623;R-HSA-5654148;R-HSA-5654222;R-HSA-5654413;R-HSA-5654730;R-HSA-5654408;R-HSA-5654409;R-HSA-5654646;R-HSA-5654647;R-HSA-5654709;R-HSA-5654643;R-HSA-5654640;R-HSA-5654641;R-HSA-5654705;R-HSA-5654631;R-HSA-5654628;R-HSA-5654565;R-HSA-8941628;R-HSA-190388;R-HSA-190261;R-HSA-5654625;R-HSA-5654637;R-HSA-5654634;R-HSA-5654633
R-HSA-350562	Regulation of ornithine decarboxylase (ODC)	1	52	0.0037188	0.764392	0.764392	1	4	0.000339328	0.895261	9606	Homo sapiens	psme4a		R-HSA-353125
R-HSA-432040	Vasopressin regulates renal water homeostasis via Aquaporins	1	52	0.0037188	0.764392	0.764392	1	15	0.00127248	-1.84554	9606	Homo sapiens	myo5b		R-HSA-432237
R-HSA-8864260	Transcriptional regulation by the AP-2 (TFAP2) family of transcription factors	1	52	0.0037188	0.764392	0.764392	1	44	0.00373261	-0.791689	9606	Homo sapiens	cited4a		R-HSA-8864307
R-HSA-9006931	Signaling by Nuclear Receptors	5	230	0.0164485	0.765144	0.765144	18	93	0.00788938	-2.46453	9606	Homo sapiens	dhrs3a;rbp5;gata3;rdh10a;foxa1		R-HSA-9009065;R-HSA-5622134;R-HSA-5362518;R-HSA-9018497;R-HSA-9009536;R-HSA-9018499;R-HSA-9009378;R-HSA-9009541;R-HSA-5362525;R-HSA-5419165;R-HSA-9009371;R-HSA-9009533;R-HSA-9018494;R-HSA-9023859;R-HSA-9038163;R-HSA-9023861;R-HSA-9023860;R-HSA-9009526
R-HSA-390466	Chaperonin-mediated protein folding	2	100	0.00715154	0.765697	0.765697	4	19	0.00161181	-2.28958	9606	Homo sapiens	TUBB4B		R-HSA-389970;R-HSA-389954;R-HSA-389980;R-HSA-389961
R-HSA-5655302	Signaling by FGFR1 in disease	1	53	0.00379032	0.770863	0.770863	12	35	0.00296912	-3.48584	9606	Homo sapiens	fgf4		R-HSA-1839100;R-HSA-2023455;R-HSA-5655269;R-HSA-5655266;R-HSA-2023451;R-HSA-1839098;R-HSA-5655326;R-HSA-5655278;R-HSA-5655263;R-HSA-1839094;R-HSA-5655290;R-HSA-5655240
R-HSA-180534	Vpu mediated degradation of CD4	1	53	0.00379032	0.770863	0.770863	1	5	0.00042416	0.895261	9606	Homo sapiens	psme4a		R-HSA-180573
R-HSA-1236978	Cross-presentation of soluble exogenous antigens (endosomes)	1	53	0.00379032	0.770863	0.770863	1	6	0.000508992	0.895261	9606	Homo sapiens	psme4a		R-HSA-1236970
R-HSA-76009	Platelet Aggregation (Plug Formation)	1	53	0.00379032	0.770863	0.770863	1	27	0.00229046	-4.20427	9606	Homo sapiens	f2		R-HSA-429529
R-HSA-9006934	Signaling by Receptor Tyrosine Kinases	12	518	0.037045	0.775136	0.775136	123	631	0.053529	-3.24364	9606	Homo sapiens	fgf4;spint1a;fgf10a;col4a5;lamc3;hpn;spint2;lamc2;plg;col6a1;ahcyl1;fgfbp1b		R-HSA-5654614;R-HSA-5654615;R-HSA-5654612;R-HSA-5654608;R-HSA-5654622;R-HSA-5654623;R-HSA-5654620;R-HSA-5654618;R-HSA-5654596;R-HSA-5654597;R-HSA-5654594;R-HSA-5654592;R-HSA-5654607;R-HSA-5654605;R-HSA-5654603;R-HSA-5654600;R-HSA-5654646;R-HSA-6800198;R-HSA-5654647;R-HSA-5654643;R-HSA-5654640;R-HSA-190245;R-HSA-5654641;R-HSA-5654399;R-HSA-5654655;R-HSA-5654397;R-HSA-5654653;R-HSA-5654651;R-HSA-56…
R-HSA-69229	Ubiquitin-dependent degradation of Cyclin D1	1	54	0.00386183	0.777158	0.777158	1	5	0.00042416	0.895261	9606	Homo sapiens	psme4a		R-HSA-75825
R-HSA-75815	Ubiquitin-dependent degradation of Cyclin D	1	54	0.00386183	0.777158	0.777158	1	5	0.00042416	0.895261	9606	Homo sapiens	psme4a		R-HSA-75825
R-HSA-169911	Regulation of Apoptosis	1	54	0.00386183	0.777158	0.777158	1	5	0.00042416	0.895261	9606	Homo sapiens	psme4a		R-HSA-211715
R-HSA-349425	Autodegradation of the E3 ubiquitin ligase COP1	1	54	0.00386183	0.777158	0.777158	1	5	0.00042416	0.895261	9606	Homo sapiens	psme4a		R-HSA-264458
R-HSA-75153	Apoptotic execution phase	1	54	0.00386183	0.777158	0.777158	1	57	0.00483543	-1.50871	9606	Homo sapiens	cdh1		R-HSA-202939
R-HSA-1296071	Potassium Channels	2	103	0.00736609	0.779747	0.779747	2	17	0.00144214	-5.75458	9606	Homo sapiens	kcnj16;KCNJ15		R-HSA-1013020;R-HSA-1296045
R-HSA-3928665	EPH-ephrin mediated repulsion of cells	1	55	0.00393335	0.78328	0.78328	6	9	0.000763488	-1.66512	9606	Homo sapiens	epha3		R-HSA-4093327;R-HSA-3928607;R-HSA-3928604;R-HSA-3928642;R-HSA-3928628;R-HSA-3928660
R-HSA-8854050	FBXL7 down-regulates AURKA during mitotic entry and in early mitosis	1	55	0.00393335	0.78328	0.78328	2	6	0.000508992	0.895261	9606	Homo sapiens	psme4a		R-HSA-8854071;R-HSA-8854044
R-HSA-69613	p53-Independent G1/S DNA damage checkpoint	1	55	0.00393335	0.78328	0.78328	1	5	0.00042416	0.895261	9606	Homo sapiens	psme4a		R-HSA-69600
R-HSA-69601	Ubiquitin Mediated Degradation of Phosphorylated Cdc25A	1	55	0.00393335	0.78328	0.78328	1	5	0.00042416	0.895261	9606	Homo sapiens	psme4a		R-HSA-69600
R-HSA-69610	p53-Independent DNA Damage Response	1	55	0.00393335	0.78328	0.78328	1	5	0.00042416	0.895261	9606	Homo sapiens	psme4a		R-HSA-69600
R-HSA-156588	Glucuronidation	1	55	0.00393335	0.78328	0.78328	1	9	0.000763488	-0.722599	9606	Homo sapiens	ugp2b		R-HSA-70286
R-HSA-2046104	alpha-linolenic (omega3) and linoleic (omega6) acid metabolism	1	55	0.00393335	0.78328	0.78328	2	25	0.0021208	-1.7921	9606	Homo sapiens	elovl1a		R-HSA-2046094;R-HSA-2046088
R-HSA-77289	Mitochondrial Fatty Acid Beta-Oxidation	2	105	0.00750912	0.788699	0.788699	13	47	0.00398711	0.548187	9606	Homo sapiens	hadhb;acadvl		R-HSA-77283;R-HSA-77321;R-HSA-77329;R-HSA-77299;R-HSA-77301;R-HSA-77271;R-HSA-77303;R-HSA-77304;R-HSA-109339;R-HSA-77277;R-HSA-77309;R-HSA-77340;R-HSA-109342
R-HSA-450408	AUF1 (hnRNP D0) binds and destabilizes mRNA	1	56	0.00400486	0.789234	0.789234	1	4	0.000339328	0.895261	9606	Homo sapiens	psme4a		R-HSA-450466
R-HSA-180585	Vif-mediated degradation of APOBEC3G	1	56	0.00400486	0.789234	0.789234	1	4	0.000339328	0.895261	9606	Homo sapiens	psme4a		R-HSA-180603
R-HSA-209776	Amine-derived hormones	1	56	0.00400486	0.789234	0.789234	1	21	0.00178147	-7.55379	9606	Homo sapiens	dbh		R-HSA-209891
R-HSA-2453902	The canonical retinoid cycle in rods (twilight vision)	1	56	0.00400486	0.789234	0.789234	1	25	0.0021208	-1.55259	9606	Homo sapiens	rdh10a		R-HSA-74872
R-HSA-391251	Protein folding	2	106	0.00758063	0.793054	0.793054	10	28	0.0023753	-2.28958	9606	Homo sapiens	TUBB4B		R-HSA-389956;R-HSA-389974;R-HSA-389969;R-HSA-389955;R-HSA-389970;R-HSA-389954;R-HSA-389980;R-HSA-389964;R-HSA-389961;R-HSA-389976
R-HSA-381038	XBP1(S) activates chaperone genes	2	106	0.00758063	0.793054	0.793054	1	48	0.00407194	0.593625	9606	Homo sapiens	acadvl		R-HSA-1791069
R-HSA-4641258	Degradation of DVL	1	57	0.00407638	0.795025	0.795025	2	7	0.000593824	0.895261	9606	Homo sapiens	psme4a		R-HSA-1504193;R-HSA-4641260
R-HSA-4641257	Degradation of AXIN	1	57	0.00407638	0.795025	0.795025	2	8	0.000678656	0.895261	9606	Homo sapiens	psme4a		R-HSA-3640874;R-HSA-4641256
R-HSA-397014	Muscle contraction	5	240	0.0171637	0.796037	0.796037	11	39	0.00330845	0.107882	9606	Homo sapiens	myl7;myh7;tnnt2a;ahcyl1;mybpc3		R-HSA-390597;R-HSA-169683;R-HSA-445700;R-HSA-390598;R-HSA-445813;R-HSA-390593;R-HSA-445699;R-HSA-390595;R-HSA-5226904;R-HSA-445704;R-HSA-445705
R-HSA-6811434	COPI-dependent Golgi-to-ER retrograde traffic	2	107	0.00765215	0.79733	0.79733	2	11	0.000933152	-2.28958	9606	Homo sapiens	TUBB4B		R-HSA-6811426;R-HSA-6811423
R-HSA-6807878	COPI-mediated anterograde transport	2	107	0.00765215	0.79733	0.79733	2	12	0.00101798	-2.28958	9606	Homo sapiens	TUBB4B		R-HSA-6809006;R-HSA-6809003
R-HSA-8856828	Clathrin-mediated endocytosis	3	155	0.0110849	0.804368	0.804368	19	34	0.00288429	-2.24697	9606	Homo sapiens	dab2;vamp8;tfa		R-HSA-8868071;R-HSA-8868230;R-HSA-8866277;R-HSA-8863471;R-HSA-8867756;R-HSA-8868236;R-HSA-8868651;R-HSA-8867754;R-HSA-8868072;R-HSA-8868648;R-HSA-8868661;R-HSA-8868660;R-HSA-8868659;R-HSA-8868658;R-HSA-8863472;R-HSA-8869438;R-HSA-8867613;R-HSA-8871194;R-HSA-8871193
R-HSA-68827	CDT1 association with the CDC6:ORC:origin complex	1	59	0.00421941	0.806135	0.806135	1	3	0.000254496	0.895261	9606	Homo sapiens	psme4a		R-HSA-68825
R-HSA-69541	Stabilization of p53	1	59	0.00421941	0.806135	0.806135	1	15	0.00127248	0.895261	9606	Homo sapiens	psme4a		R-HSA-264458
R-HSA-381070	IRE1alpha activates chaperones	2	110	0.0078667	0.809692	0.809692	1	54	0.00458093	0.593625	9606	Homo sapiens	acadvl		R-HSA-1791069
R-HSA-418597	G alpha (z) signalling events	1	60	0.00429092	0.811463	0.811463	1	10	0.00084832	-2.64668	9606	Homo sapiens	rgs4		R-HSA-392133
R-HSA-6802949	Signaling by RAS mutants	1	61	0.00436244	0.816645	0.816645	4	8	0.000678656	-2.50645	9606	Homo sapiens	cnksr1		R-HSA-6803233;R-HSA-6802926;R-HSA-6802925;R-HSA-6802922
R-HSA-5362768	Hh mutants that don't undergo autocatalytic processing are degraded by ERAD	1	61	0.00436244	0.816645	0.816645	1	6	0.000508992	0.895261	9606	Homo sapiens	psme4a		R-HSA-5387392
R-HSA-5676590	NIK-->noncanonical NF-kB signaling	1	61	0.00436244	0.816645	0.816645	1	9	0.000763488	0.895261	9606	Homo sapiens	psme4a		R-HSA-5607731
R-HSA-9018678	Biosynthesis of specialized proresolving mediators (SPMs)	3	159	0.011371	0.817896	0.817896	15	124	0.0105192	-2.15365	9606	Homo sapiens	ptgr1;alox12		R-HSA-9024872;R-HSA-9025152;R-HSA-9020610;R-HSA-9025957;R-HSA-2161775;R-HSA-9020262;R-HSA-9018907;R-HSA-2161844;R-HSA-9024881;R-HSA-9026003;R-HSA-9020275;R-HSA-9020274;R-HSA-9026007;R-HSA-9024983;R-HSA-9026006
R-HSA-5610785	GLI3 is processed to GLI3R by the proteasome	1	62	0.00443396	0.821684	0.821684	1	5	0.00042416	0.895261	9606	Homo sapiens	psme4a		R-HSA-5610754
R-HSA-5610783	Degradation of GLI2 by the proteasome	1	62	0.00443396	0.821684	0.821684	1	5	0.00042416	0.895261	9606	Homo sapiens	psme4a		R-HSA-5610757
R-HSA-8956320	Nucleobase biosynthesis	1	62	0.00443396	0.821684	0.821684	2	23	0.00195114	-1.66752	9606	Homo sapiens	atic		R-HSA-73797;R-HSA-73798
R-HSA-9006936	Signaling by TGF-beta family members	2	114	0.00815276	0.825129	0.825129	15	107	0.00907703	-3.43277	9606	Homo sapiens	inhbaa;bmp2b		R-HSA-201475;R-HSA-201443;R-HSA-1549526;R-HSA-2473184;R-HSA-2473186;R-HSA-201476;R-HSA-2470508;R-HSA-201453;R-HSA-1181149;R-HSA-201810;R-HSA-201457;R-HSA-1181153;R-HSA-201648;R-HSA-2470483;R-HSA-201821
R-HSA-174084	Autodegradation of Cdh1 by Cdh1:APC/C	1	63	0.00450547	0.826586	0.826586	2	2	0.000169664	-1.50871	9606	Homo sapiens	cdh1		R-HSA-174058;R-HSA-174057
R-HSA-112043	PLC beta mediated events	1	63	0.00450547	0.826586	0.826586	1	23	0.00195114	-2.21048	9606	Homo sapiens	ahcyl1		R-HSA-169683
R-HSA-8935690	Digestion	1	63	0.00450547	0.826586	0.826586	1	24	0.00203597	-9.44803	9606	Homo sapiens	star		R-HSA-8936214
R-HSA-5387390	Hh mutants abrogate ligand secretion	1	64	0.00457699	0.831353	0.831353	1	7	0.000593824	0.895261	9606	Homo sapiens	psme4a		R-HSA-5387392
R-HSA-5578775	Ion homeostasis	1	64	0.00457699	0.831353	0.831353	2	15	0.00127248	-2.21048	9606	Homo sapiens	ahcyl1		R-HSA-169683;R-HSA-5226904
R-HSA-112040	G-protein mediated events	1	64	0.00457699	0.831353	0.831353	1	32	0.00271463	-2.21048	9606	Homo sapiens	ahcyl1		R-HSA-169683
R-HSA-425366	Transport of bile salts and organic acids, metal ions and amine compounds	3	165	0.0118	0.836696	0.836696	3	66	0.00559891	-5.58413	9606	Homo sapiens	slc22a21;slc6a14		R-HSA-549241;R-HSA-549297;R-HSA-375487
R-HSA-2142753	Arachidonic acid metabolism	3	166	0.0118716	0.839661	0.839661	6	77	0.00653207	-2.15365	9606	Homo sapiens	ptgr1;alox12		R-HSA-2161794;R-HSA-2162002;R-HSA-2162019;R-HSA-2161948;R-HSA-2161964;R-HSA-2161567
R-HSA-4608870	Asymmetric localization of PCP proteins	1	66	0.00472002	0.840499	0.840499	1	7	0.000593824	0.895261	9606	Homo sapiens	psme4a		R-HSA-4608855
R-HSA-5607761	Dectin-1 mediated noncanonical NF-kB signaling	1	66	0.00472002	0.840499	0.840499	1	9	0.000763488	0.895261	9606	Homo sapiens	psme4a		R-HSA-5607731
R-HSA-201722	Formation of the beta-catenin:TCF transactivating complex	1	67	0.00479153	0.844884	0.844884	13	13	0.00110282	-1.2062	9606	Homo sapiens	tcf7l2		R-HSA-3299569;R-HSA-4411367;R-HSA-3322422;R-HSA-3451153;R-HSA-3364026;R-HSA-3322427;R-HSA-3322424;R-HSA-4411372;R-HSA-201712;R-HSA-4411351;R-HSA-3364014;R-HSA-4411357;R-HSA-3451147
R-HSA-174154	APC/C:Cdc20 mediated degradation of Securin	1	67	0.00479153	0.844884	0.844884	1	3	0.000254496	0.895261	9606	Homo sapiens	psme4a		R-HSA-174202
R-HSA-5678895	Defective CFTR causes cystic fibrosis	1	67	0.00479153	0.844884	0.844884	1	7	0.000593824	0.895261	9606	Homo sapiens	psme4a		R-HSA-8866858
R-HSA-421270	Cell-cell junction organization	1	67	0.00479153	0.844884	0.844884	2	21	0.00178147	-1.50871	9606	Homo sapiens	cdh1		R-HSA-419002;R-HSA-419001
R-HSA-156590	Glutathione conjugation	1	67	0.00479153	0.844884	0.844884	1	14	0.00118765	-1.58917	9606	Homo sapiens	gstp1		R-HSA-176054
R-HSA-2672351	Stimuli-sensing channels	2	120	0.00858185	0.846181	0.846181	3	24	0.00203597	-3.66731	9606	Homo sapiens	ano1;asic2		R-HSA-8863494;R-HSA-2671885;R-HSA-2684901
R-HSA-5607764	CLEC7A (Dectin-1) signaling	2	120	0.00858185	0.846181	0.846181	3	45	0.00381744	-0.65761	9606	Homo sapiens	ahcyl1;psme4a		R-HSA-169683;R-HSA-5607731;R-HSA-5607724
R-HSA-6802952	Signaling by BRAF and RAF fusions	1	68	0.00486305	0.849149	0.849149	4	5	0.00042416	-2.50645	9606	Homo sapiens	cnksr1		R-HSA-6802935;R-HSA-6802934;R-HSA-6802933;R-HSA-6802932
R-HSA-8873719	RAB geranylgeranylation	1	68	0.00486305	0.849149	0.849149	2	5	0.00042416	-3.49831	9606	Homo sapiens	rab32a		R-HSA-8870469;R-HSA-8870466
R-HSA-68867	Assembly of the pre-replicative complex	1	68	0.00486305	0.849149	0.849149	1	12	0.00101798	0.895261	9606	Homo sapiens	psme4a		R-HSA-68825
R-HSA-8956321	Nucleotide salvage	1	68	0.00486305	0.849149	0.849149	1	21	0.00178147	0.738148	9606	Homo sapiens	ampd3b		R-HSA-76590
R-HSA-445717	Aquaporin-mediated transport	1	68	0.00486305	0.849149	0.849149	1	25	0.0021208	-1.84554	9606	Homo sapiens	myo5b		R-HSA-432237
R-HSA-201681	TCF dependent signaling in response to WNT	4	216	0.0154473	0.850301	0.850301	23	71	0.00602307	-1.63414	9606	Homo sapiens	tcf7l2;sox2;sost;psme4a		R-HSA-3299569;R-HSA-3361751;R-HSA-4411367;R-HSA-3322422;R-HSA-3451153;R-HSA-3364026;R-HSA-3322427;R-HSA-3322424;R-HSA-4641260;R-HSA-3769397;R-HSA-1458875;R-HSA-4641256;R-HSA-4411372;R-HSA-5626938;R-HSA-201712;R-HSA-4411351;R-HSA-1504193;R-HSA-3364042;R-HSA-3364014;R-HSA-3640874;R-HSA-5665608;R-HSA-4411357;R-HSA-3451147
R-HSA-6811558	PI5P, PP2A and IER3 Regulate PI3K/AKT Signaling	2	122	0.00872488	0.852671	0.852671	1	7	0.000593824	-3.43902	9606	Homo sapiens	fgf4;fgf10a		R-HSA-2316434
R-HSA-168643	Nucleotide-binding domain, leucine rich repeat containing receptor (NLR) signaling pathways	1	69	0.00493456	0.853298	0.853298	3	45	0.00381744	-2.18713	9606	Homo sapiens	txn		R-HSA-1250280;R-HSA-1250264;R-HSA-1250253
R-HSA-70895	Branched-chain amino acid catabolism	1	69	0.00493456	0.853298	0.853298	1	28	0.0023753	0.574472	9606	Homo sapiens	bckdk		R-HSA-5693148
R-HSA-5658442	Regulation of RAS by GAPs	1	70	0.00500608	0.857332	0.857332	1	5	0.00042416	0.895261	9606	Homo sapiens	psme4a		R-HSA-5658430
R-HSA-1234176	Oxygen-dependent proline hydroxylation of Hypoxia-inducible Factor Alpha	1	70	0.00500608	0.857332	0.857332	1	12	0.00101798	0.895261	9606	Homo sapiens	psme4a		R-HSA-1234159
R-HSA-69563	p53-Dependent G1 DNA Damage Response	1	70	0.00500608	0.857332	0.857332	1	22	0.0018663	0.895261	9606	Homo sapiens	psme4a		R-HSA-264458
R-HSA-69580	p53-Dependent G1/S DNA damage checkpoint	1	70	0.00500608	0.857332	0.857332	1	22	0.0018663	0.895261	9606	Homo sapiens	psme4a		R-HSA-264458
R-HSA-112314	Neurotransmitter receptors and postsynaptic signal transmission	3	173	0.0123722	0.859146	0.859146	2	58	0.00492026	-5.90237	9606	Homo sapiens	kcnj16;KCNJ15;glra4a		R-HSA-975389;R-HSA-1013020
R-HSA-8963743	Digestion and absorption	1	71	0.00507759	0.861256	0.861256	1	30	0.00254496	-9.44803	9606	Homo sapiens	star		R-HSA-8936214
R-HSA-5628897	TP53 Regulates Metabolic Genes	2	125	0.00893943	0.86194	0.86194	4	34	0.00288429	-0.741552	9606	Homo sapiens	gls2b;txn		R-HSA-70609;R-HSA-5632924;R-HSA-3341343;R-HSA-73646
R-HSA-174184	Cdc20:Phospho-APC/C mediated degradation of Cyclin A	1	72	0.00514911	0.865072	0.865072	1	3	0.000254496	0.895261	9606	Homo sapiens	psme4a		R-HSA-174255
R-HSA-1169091	Activation of NF-kappaB in B cells	1	72	0.00514911	0.865072	0.865072	1	10	0.00084832	0.895261	9606	Homo sapiens	psme4a		R-HSA-1168640
R-HSA-1222352	Latent infection of Homo sapiens with Mycobacterium tuberculosis	1	72	0.00514911	0.865072	0.865072	3	34	0.00288429	-3.08489	9606	Homo sapiens	tfa		R-HSA-1222641;R-HSA-8951549;R-HSA-8951552
R-HSA-1222499	Response of Mtb to phagocytosis	1	72	0.00514911	0.865072	0.865072	3	34	0.00288429	-3.08489	9606	Homo sapiens	tfa		R-HSA-1222641;R-HSA-8951549;R-HSA-8951552
R-HSA-69615	G1/S DNA Damage Checkpoints	1	72	0.00514911	0.865072	0.865072	2	27	0.00229046	0.895261	9606	Homo sapiens	psme4a		R-HSA-69600;R-HSA-264458
R-HSA-68949	Orc1 removal from chromatin	1	73	0.00522063	0.868784	0.868784	1	4	0.000339328	0.895261	9606	Homo sapiens	psme4a		R-HSA-68948
R-HSA-179419	APC:Cdc20 mediated degradation of cell cycle proteins prior to satisfation of the cell cycle checkpoint	1	73	0.00522063	0.868784	0.868784	1	6	0.000508992	0.895261	9606	Homo sapiens	psme4a		R-HSA-174255
R-HSA-8948751	Regulation of PTEN stability and activity	1	74	0.00529214	0.872393	0.872393	1	13	0.00110282	0.895261	9606	Homo sapiens	psme4a		R-HSA-8850992
R-HSA-6805567	Keratinization	4	226	0.0161625	0.873456	0.873456	16	34	0.00288429	-2.3668	9606	Homo sapiens	krt17;pkp3a		R-HSA-6814695;R-HSA-6806629;R-HSA-6805573;R-HSA-6814734;R-HSA-6814764;R-HSA-6805546;R-HSA-6810357;R-HSA-6806613;R-HSA-6814387;R-HSA-6811539;R-HSA-6806610;R-HSA-6809393;R-HSA-8942224;R-HSA-6809663;R-HSA-6814298;R-HSA-6810937
R-HSA-5673001	RAF/MAP kinase cascade	5	273	0.0195237	0.875795	0.875795	8	39	0.00330845	-2.08166	9606	Homo sapiens	fgf4;cnksr1;fgf10a;il17rd;psme4a		R-HSA-5672980;R-HSA-5672965;R-HSA-5674373;R-HSA-5672978;R-HSA-5658430;R-HSA-5674366;R-HSA-5672972;R-HSA-5672973
R-HSA-176409	APC/C:Cdc20 mediated degradation of mitotic proteins	1	75	0.00536366	0.875904	0.875904	2	13	0.00110282	0.895261	9606	Homo sapiens	psme4a		R-HSA-174202;R-HSA-174255
R-HSA-199418	Negative regulation of the PI3K/AKT network	2	130	0.009297	0.876209	0.876209	1	10	0.00084832	-3.43902	9606	Homo sapiens	fgf4;fgf10a		R-HSA-2316434
R-HSA-2219528	PI3K/AKT Signaling in Cancer	2	130	0.009297	0.876209	0.876209	1	21	0.00178147	-3.43902	9606	Homo sapiens	fgf4;fgf10a		R-HSA-2400009
R-HSA-373760	L1CAM interactions	2	130	0.009297	0.876209	0.876209	2	54	0.00458093	-2.28958	9606	Homo sapiens	TUBB4B		R-HSA-445077;R-HSA-445071
R-HSA-176814	Activation of APC/C and APC/C:Cdc20 mediated degradation of mitotic proteins	1	76	0.00543517	0.879318	0.879318	2	15	0.00127248	0.895261	9606	Homo sapiens	psme4a		R-HSA-174202;R-HSA-174255
R-HSA-69239	Synthesis of DNA	2	132	0.00944003	0.881527	0.881527	3	26	0.00220563	-0.306724	9606	Homo sapiens	cdh1;psme4a		R-HSA-68948;R-HSA-69015;R-HSA-69016
R-HSA-168898	Toll-like Receptor Cascades	3	183	0.0130873	0.883379	0.883379	7	180	0.0152698	-3.01211	9606	Homo sapiens	sarm1;sigirr;ctsla		R-HSA-2559568;R-HSA-936985;R-HSA-9014320;R-HSA-166072;R-HSA-2201338;R-HSA-168921;R-HSA-1678981
R-HSA-1500931	Cell-Cell communication	2	133	0.00951155	0.884106	0.884106	6	60	0.00508992	-3.12782	9606	Homo sapiens	cdh1;lamc2		R-HSA-446083;R-HSA-432956;R-HSA-446077;R-HSA-419002;R-HSA-446089;R-HSA-419001
R-HSA-2500257	Resolution of Sister Chromatid Cohesion	2	134	0.00958307	0.886634	0.886634	4	8	0.000678656	-2.28958	9606	Homo sapiens	TUBB4B		R-HSA-2484822;R-HSA-1638803;R-HSA-2468287;R-HSA-1638821
R-HSA-2980736	Peptide hormone metabolism	2	134	0.00958307	0.886634	0.886634	2	60	0.00508992	-2.98544	9606	Homo sapiens	tcf7l2;inhbaa		R-HSA-381799;R-HSA-378975
R-HSA-5684996	MAPK1/MAPK3 signaling	5	280	0.0200243	0.888816	0.888816	8	46	0.00390227	-2.08166	9606	Homo sapiens	fgf4;cnksr1;fgf10a;il17rd;psme4a		R-HSA-5672980;R-HSA-5672965;R-HSA-5674373;R-HSA-5672978;R-HSA-5658430;R-HSA-5674366;R-HSA-5672972;R-HSA-5672973
R-HSA-75105	Fatty acyl-CoA biosynthesis	1	79	0.00564972	0.889009	0.889009	2	24	0.00203597	-1.7921	9606	Homo sapiens	elovl1a		R-HSA-548830;R-HSA-548800
R-HSA-1660661	Sphingolipid de novo biosynthesis	1	79	0.00564972	0.889009	0.889009	1	30	0.00254496	-2.92815	9606	Homo sapiens	degs2		R-HSA-428260
R-HSA-1236975	Antigen processing-Cross presentation	3	186	0.0133019	0.889889	0.889889	4	23	0.00195114	-0.553224	9606	Homo sapiens	vamp8;ctsla;psme4a		R-HSA-8863973;R-HSA-1236935;R-HSA-1236948;R-HSA-1236970
R-HSA-4086398	Ca2+ pathway	1	80	0.00572123	0.892064	0.892064	3	27	0.00229046	-1.2062	9606	Homo sapiens	tcf7l2		R-HSA-8944362;R-HSA-4411383;R-HSA-4411365
R-HSA-6788656	Histidine, lysine, phenylalanine, tyrosine, proline and tryptophan catabolism	2	137	0.00979761	0.893913	0.893913	2	53	0.0044961	-5.43491	9606	Homo sapiens	zgc:158423;ftcd		R-HSA-70920;R-HSA-352232
R-HSA-499943	Interconversion of nucleotide di- and triphosphates	1	81	0.00579275	0.895034	0.895034	3	33	0.00279946	-2.18713	9606	Homo sapiens	txn		R-HSA-111751;R-HSA-111804;R-HSA-73646
R-HSA-1236977	Endosomal/Vacuolar pathway	1	82	0.00586426	0.897923	0.897923	1	4	0.000339328	-1.29211	9606	Homo sapiens	ctsla		R-HSA-1236948
R-HSA-70614	Amino acid synthesis and interconversion (transamination)	1	82	0.00586426	0.897923	0.897923	1	35	0.00296912	0.704032	9606	Homo sapiens	gls2b		R-HSA-70609
R-HSA-977606	Regulation of Complement cascade	2	139	0.00994064	0.898522	0.898522	4	42	0.00356295	-5.63484	9606	Homo sapiens	c9;f2		R-HSA-8852580;R-HSA-2530429;R-HSA-2530445;R-HSA-8852716
R-HSA-917937	Iron uptake and transport	1	83	0.00593578	0.900733	0.900733	7	34	0.00288429	-3.08489	9606	Homo sapiens	tfa		R-HSA-917839;R-HSA-917807;R-HSA-917835;R-HSA-917814;R-HSA-5691150;R-HSA-917987;R-HSA-917888
R-HSA-2262749	Cellular response to hypoxia	1	83	0.00593578	0.900733	0.900733	1	20	0.00169664	0.895261	9606	Homo sapiens	psme4a		R-HSA-1234159
R-HSA-1234174	Regulation of Hypoxia-inducible Factor (HIF) by oxygen	1	83	0.00593578	0.900733	0.900733	1	20	0.00169664	0.895261	9606	Homo sapiens	psme4a		R-HSA-1234159
R-HSA-69306	DNA Replication	2	141	0.0100837	0.902944	0.902944	4	47	0.00398711	-0.306724	9606	Homo sapiens	cdh1;psme4a		R-HSA-68948;R-HSA-69015;R-HSA-68825;R-HSA-69016
R-HSA-383280	Nuclear Receptor transcription pathway	1	84	0.00600729	0.903466	0.903466	1	1	8.4832e-05	-1.58468	9606	Homo sapiens	nr2f1a		R-HSA-376419
R-HSA-2467813	Separation of Sister Chromatids	3	194	0.013874	0.905689	0.905689	3	8	0.000678656	-1.22796	9606	Homo sapiens	TUBB4B;psme4a		R-HSA-2467809;R-HSA-2467811;R-HSA-174202
R-HSA-983231	Factors involved in megakaryocyte development and platelet production	3	194	0.013874	0.905689	0.905689	3	43	0.00364778	-2.07094	9606	Homo sapiens	gata3;TUBB4B		R-HSA-983259;R-HSA-996755;R-HSA-983266
R-HSA-1660662	Glycosphingolipid metabolism	1	86	0.00615033	0.908708	0.908708	1	32	0.00271463	-3.45372	9606	Homo sapiens	arsj		R-HSA-1614362
R-HSA-166016	Toll Like Receptor 4 (TLR4) Cascade	2	144	0.0102982	0.909242	0.909242	5	94	0.00797421	-3.87211	9606	Homo sapiens	sarm1;sigirr		R-HSA-2559568;R-HSA-936985;R-HSA-166072;R-HSA-2201338;R-HSA-168921
R-HSA-6802957	Oncogenic MAPK signaling	1	87	0.00622184	0.911222	0.911222	20	34	0.00288429	-2.50645	9606	Homo sapiens	cnksr1		R-HSA-6802919;R-HSA-6802918;R-HSA-6802914;R-HSA-6803234;R-HSA-6803233;R-HSA-6802912;R-HSA-6802926;R-HSA-6802925;R-HSA-6802922;R-HSA-6802921;R-HSA-6802935;R-HSA-6802934;R-HSA-6802933;R-HSA-6802932;R-HSA-6802911;R-HSA-6802943;R-HSA-6802910;R-HSA-6803230;R-HSA-6802942;R-HSA-6803227
R-HSA-2559583	Cellular Senescence	3	198	0.0141601	0.912796	0.912796	9	89	0.00755005	-1.56428	9606	Homo sapiens	cdh1;id1;txn		R-HSA-3790137;R-HSA-8979082;R-HSA-3788705;R-HSA-3225851;R-HSA-3790130;R-HSA-3788725;R-HSA-3209165;R-HSA-3788724;R-HSA-3788708
R-HSA-69002	DNA Replication Pre-Initiation	1	88	0.00629336	0.913667	0.913667	1	21	0.00178147	0.895261	9606	Homo sapiens	psme4a		R-HSA-68825
R-HSA-2559582	Senescence-Associated Secretory Phenotype (SASP)	1	89	0.00636487	0.916044	0.916044	6	22	0.0018663	-1.50871	9606	Homo sapiens	cdh1		R-HSA-3790137;R-HSA-3788705;R-HSA-3790130;R-HSA-3788725;R-HSA-3788724;R-HSA-3788708
R-HSA-1912408	Pre-NOTCH Transcription and Translation	1	89	0.00636487	0.916044	0.916044	3	28	0.0023753	-3.2149	9606	Homo sapiens	elf3		R-HSA-1912415;R-HSA-9021357;R-HSA-9021364
R-HSA-8856688	Golgi-to-ER retrograde transport	2	148	0.0105843	0.917046	0.917046	4	18	0.00152698	-2.28958	9606	Homo sapiens	TUBB4B		R-HSA-8849350;R-HSA-6811426;R-HSA-6811423;R-HSA-8849353
R-HSA-162909	Host Interactions of HIV factors	2	148	0.0105843	0.917046	0.917046	5	54	0.00458093	-0.63437	9606	Homo sapiens	ap1s3b;psme4a		R-HSA-182263;R-HSA-182279;R-HSA-180603;R-HSA-182286;R-HSA-180573
R-HSA-69656	Cyclin A:Cdk2-associated events at S phase entry	1	90	0.00643639	0.918356	0.918356	1	19	0.00161181	-1.50871	9606	Homo sapiens	cdh1		R-HSA-187948
R-HSA-5663220	RHO GTPases Activate Formins	2	149	0.0106558	0.918896	0.918896	1	27	0.00229046	-2.28958	9606	Homo sapiens	TUBB4B		R-HSA-5666169
R-HSA-375276	Peptide ligand-binding receptors	3	202	0.0144461	0.919413	0.919413	2	74	0.00627757	-3.3129	9606	Homo sapiens	ackr3b;cxcr4a;f2		R-HSA-389463;R-HSA-374214
R-HSA-1168372	Downstream signaling events of B Cell Receptor (BCR)	1	92	0.00657942	0.922792	0.922792	1	14	0.00118765	0.895261	9606	Homo sapiens	psme4a		R-HSA-1168640
R-HSA-450531	Regulation of mRNA stability by proteins that bind AU-rich elements	1	93	0.00665093	0.924919	0.924919	1	26	0.00220563	0.895261	9606	Homo sapiens	psme4a		R-HSA-450466
R-HSA-5689880	Ub-specific processing proteases	3	206	0.0147322	0.925571	0.925571	3	40	0.00339328	-0.0367915	9606	Homo sapiens	gata3;usp28;psme4a		R-HSA-5696914;R-HSA-5689539;R-HSA-6783177
R-HSA-9018519	Estrogen-dependent gene expression	2	153	0.0109419	0.925917	0.925917	14	66	0.00559891	-2.95934	9606	Homo sapiens	gata3;foxa1		R-HSA-9009065;R-HSA-9018497;R-HSA-9009536;R-HSA-9018499;R-HSA-9009378;R-HSA-9009541;R-HSA-9009371;R-HSA-9009533;R-HSA-9018494;R-HSA-9023859;R-HSA-9038163;R-HSA-9023861;R-HSA-9023860;R-HSA-9009526
R-HSA-157118	Signaling by NOTCH	4	257	0.0183795	0.926662	0.926662	8	152	0.0128945	-0.239623	9606	Homo sapiens	hey2;elf3;hdac7b		R-HSA-1912415;R-HSA-9014141;R-HSA-9021357;R-HSA-1912388;R-HSA-9604553;R-HSA-9021364;R-HSA-4396382;R-HSA-1980065
R-HSA-156580	Phase II - Conjugation of compounds	4	258	0.018451	0.927982	0.927982	5	70	0.00593824	-1.9378	9606	Homo sapiens	sult6b1;gstp1;slc26a1;ugp2b		R-HSA-176054;R-HSA-427555;R-HSA-176474;R-HSA-176585;R-HSA-70286
R-HSA-68882	Mitotic Anaphase	3	208	0.0148752	0.928485	0.928485	3	11	0.000933152	-1.22796	9606	Homo sapiens	TUBB4B;psme4a		R-HSA-2467809;R-HSA-2467811;R-HSA-174202
R-HSA-166658	Complement cascade	2	156	0.0111564	0.930802	0.930802	8	71	0.00602307	-5.63484	9606	Homo sapiens	c9;f2		R-HSA-8852580;R-HSA-173723;R-HSA-173720;R-HSA-2530429;R-HSA-2530445;R-HSA-8852716;R-HSA-173725;R-HSA-173709
R-HSA-8878171	Transcriptional regulation by RUNX1	4	261	0.0186655	0.931816	0.931816	5	132	0.0111978	-1.20087	9606	Homo sapiens	lmo1;gata3;ctsla;psme4a		R-HSA-8956568;R-HSA-8956586;R-HSA-8938108;R-HSA-8956608;R-HSA-8957265
R-HSA-428157	Sphingolipid metabolism	2	157	0.0112279	0.932362	0.932362	2	62	0.00525959	-3.19093	9606	Homo sapiens	degs2;arsj		R-HSA-428260;R-HSA-1614362
R-HSA-2555396	Mitotic Metaphase and Anaphase	3	211	0.0150898	0.932661	0.932661	3	12	0.00101798	-1.22796	9606	Homo sapiens	TUBB4B;psme4a		R-HSA-2467809;R-HSA-2467811;R-HSA-174202
R-HSA-69275	G2/M Transition	3	212	0.0151613	0.934002	0.934002	18	78	0.0066169	-1.22796	9606	Homo sapiens	TUBB4B;psme4a		R-HSA-380455;R-HSA-380294;R-HSA-8852354;R-HSA-380303;R-HSA-8853419;R-HSA-8852298;R-HSA-8854071;R-HSA-3000319;R-HSA-380311;R-HSA-380272;R-HSA-8852306;R-HSA-2574845;R-HSA-8853405;R-HSA-3000310;R-HSA-8854044;R-HSA-380283;R-HSA-2574840;R-HSA-8852280
R-HSA-5689603	UCH proteinases	1	98	0.00700851	0.934707	0.934707	2	11	0.000933152	0.895261	9606	Homo sapiens	psme4a		R-HSA-5665854;R-HSA-5665871
R-HSA-5619084	ABC transporter disorders	1	98	0.00700851	0.934707	0.934707	1	22	0.0018663	0.895261	9606	Homo sapiens	psme4a		R-HSA-8866858
R-HSA-4086400	PCP/CE pathway	1	99	0.00708003	0.936507	0.936507	1	24	0.00203597	0.895261	9606	Homo sapiens	psme4a		R-HSA-4608855
R-HSA-112310	Neurotransmitter release cycle	1	99	0.00708003	0.936507	0.936507	1	36	0.00305395	0.704032	9606	Homo sapiens	gls2b		R-HSA-70609
R-HSA-453274	Mitotic G2-G2/M phases	3	214	0.0153043	0.936612	0.936612	18	80	0.00678656	-1.22796	9606	Homo sapiens	TUBB4B;psme4a		R-HSA-380455;R-HSA-380294;R-HSA-8852354;R-HSA-380303;R-HSA-8853419;R-HSA-8852298;R-HSA-8854071;R-HSA-3000319;R-HSA-380311;R-HSA-380272;R-HSA-8852306;R-HSA-2574845;R-HSA-8853405;R-HSA-3000310;R-HSA-8854044;R-HSA-380283;R-HSA-2574840;R-HSA-8852280
R-HSA-8939211	ESR-mediated signaling	2	160	0.0114425	0.936844	0.936844	14	72	0.00610791	-2.95934	9606	Homo sapiens	gata3;foxa1		R-HSA-9009065;R-HSA-9018497;R-HSA-9009536;R-HSA-9018499;R-HSA-9009378;R-HSA-9009541;R-HSA-9009371;R-HSA-9009533;R-HSA-9018494;R-HSA-9023859;R-HSA-9038163;R-HSA-9023861;R-HSA-9023860;R-HSA-9009526
R-HSA-381119	Unfolded Protein Response (UPR)	2	160	0.0114425	0.936844	0.936844	1	95	0.00805904	0.593625	9606	Homo sapiens	acadvl		R-HSA-1791069
R-HSA-8986944	Transcriptional Regulation by MECP2	1	100	0.00715154	0.938257	0.938257	2	77	0.00653207	-3.80857	9606	Homo sapiens	sox2		R-HSA-9615554;R-HSA-9615536
R-HSA-446652	Interleukin-1 family signaling	2	162	0.0115855	0.939675	0.939675	4	78	0.0066169	-1.4564	9606	Homo sapiens	sigirr;psme4a		R-HSA-9008684;R-HSA-209061;R-HSA-9008577;R-HSA-9009072
R-HSA-2682334	EPH-Ephrin signaling	1	101	0.00722306	0.939958	0.939958	14	56	0.00475059	-1.66512	9606	Homo sapiens	epha3		R-HSA-3928602;R-HSA-3928607;R-HSA-3928604;R-HSA-3928597;R-HSA-3928628;R-HSA-3928660;R-HSA-3928651;R-HSA-4093327;R-HSA-3928584;R-HSA-3928648;R-HSA-3928591;R-HSA-3928642;R-HSA-3928578;R-HSA-3928646
R-HSA-1236974	ER-Phagosome pathway	2	164	0.0117285	0.942385	0.942385	2	10	0.00084832	-0.183783	9606	Homo sapiens	vamp8;psme4a		R-HSA-8863973;R-HSA-1236935
R-HSA-199977	ER to Golgi Anterograde Transport	2	164	0.0117285	0.942385	0.942385	2	39	0.00330845	-2.28958	9606	Homo sapiens	TUBB4B		R-HSA-6809006;R-HSA-6809003
R-HSA-983695	Antigen activates B Cell Receptor (BCR) leading to generation of second messengers	1	103	0.00736609	0.943223	0.943223	1	25	0.0021208	-2.21048	9606	Homo sapiens	ahcyl1		R-HSA-169683
R-HSA-3858494	Beta-catenin independent WNT signaling	2	165	0.0118	0.943696	0.943696	4	51	0.00432643	-0.155471	9606	Homo sapiens	tcf7l2;psme4a		R-HSA-4608855;R-HSA-8944362;R-HSA-4411383;R-HSA-4411365
R-HSA-5668541	TNFR2 non-canonical NF-kB pathway	1	104	0.0074376	0.944788	0.944788	3	43	0.00364778	0.895261	9606	Homo sapiens	psme4a		R-HSA-5607731;R-HSA-5668481;R-HSA-5668520
R-HSA-422356	Regulation of insulin secretion	1	104	0.0074376	0.944788	0.944788	1	37	0.00313879	-2.21048	9606	Homo sapiens	ahcyl1		R-HSA-169683
R-HSA-111885	Opioid Signalling	1	104	0.0074376	0.944788	0.944788	1	49	0.00415677	-2.21048	9606	Homo sapiens	ahcyl1		R-HSA-169683
R-HSA-2187338	Visual phototransduction	2	168	0.0120146	0.947462	0.947462	2	90	0.00763488	-2.31549	9606	Homo sapiens	dhrs3a;rdh10a		R-HSA-2465940;R-HSA-74872
R-HSA-5687128	MAPK6/MAPK4 signaling	1	106	0.00758063	0.947791	0.947791	1	40	0.00339328	0.895261	9606	Homo sapiens	psme4a		R-HSA-5687112
R-HSA-168164	Toll Like Receptor 3 (TLR3) Cascade	1	107	0.00765215	0.94923	0.94923	1	60	0.00508992	-3.93616	9606	Homo sapiens	sarm1		R-HSA-9014320
R-HSA-70171	Glycolysis	1	108	0.00772366	0.95063	0.95063	6	24	0.00203597	0.694976	9606	Homo sapiens	myl7		R-HSA-70420;R-HSA-170810;R-HSA-170824;R-HSA-170825;R-HSA-170799;R-HSA-170796
R-HSA-166166	MyD88-independent TLR4 cascade	1	108	0.00772366	0.95063	0.95063	4	59	0.00500509	-3.93616	9606	Homo sapiens	sarm1		R-HSA-2559568;R-HSA-936985;R-HSA-2201338;R-HSA-168921
R-HSA-937061	TRIF(TICAM1)-mediated TLR4 signaling	1	108	0.00772366	0.95063	0.95063	3	57	0.00483543	-3.93616	9606	Homo sapiens	sarm1		R-HSA-936985;R-HSA-2201338;R-HSA-168921
R-HSA-195721	Signaling by WNT	5	330	0.0236001	0.951981	0.951981	41	156	0.0132338	-2.20093	9606	Homo sapiens	tcf7l2;wnt2;sox2;sost;psme4a		R-HSA-3299569;R-HSA-3322422;R-HSA-4641231;R-HSA-3364026;R-HSA-3322427;R-HSA-3322424;R-HSA-2130282;R-HSA-3781941;R-HSA-3769397;R-HSA-3781943;R-HSA-3247840;R-HSA-4608855;R-HSA-3238691;R-HSA-3247843;R-HSA-4411351;R-HSA-8944349;R-HSA-3247844;R-HSA-3238694;R-HSA-1504193;R-HSA-3364014;R-HSA-3640874;R-HSA-5665608;R-HSA-4411357;R-HSA-8944362;R-HSA-3361751;R-HSA-4411367;R-HSA-3451153;R-HSA-4411365;R-HSA-8…
R-HSA-9020702	Interleukin-1 signaling	1	109	0.00779518	0.951992	0.951992	1	45	0.00381744	0.895261	9606	Homo sapiens	psme4a		R-HSA-209061
R-HSA-5683057	MAPK family signaling cascades	5	331	0.0236716	0.952818	0.952818	9	86	0.00729555	-2.08166	9606	Homo sapiens	fgf4;cnksr1;fgf10a;il17rd;psme4a		R-HSA-5672980;R-HSA-5672965;R-HSA-5674373;R-HSA-5672978;R-HSA-5658430;R-HSA-5674366;R-HSA-5672972;R-HSA-5672973;R-HSA-5687112
R-HSA-453279	Mitotic G1-G1/S phases	2	173	0.0123722	0.953211	0.953211	2	98	0.00831354	0.808928	9606	Homo sapiens	top2a		R-HSA-8964475;R-HSA-8964531
R-HSA-166058	MyD88:MAL(TIRAP) cascade initiated on plasma membrane	1	110	0.0078667	0.953316	0.953316	1	63	0.00534442	-3.80806	9606	Homo sapiens	sigirr		R-HSA-166072
R-HSA-168188	Toll Like Receptor TLR6:TLR2 Cascade	1	110	0.0078667	0.953316	0.953316	1	65	0.00551408	-3.80806	9606	Homo sapiens	sigirr		R-HSA-166072
R-HSA-5663202	Diseases of signal transduction	8	475	0.0339698	0.953552	0.953552	67	297	0.0251951	-0.929879	9606	Homo sapiens	fgf4;cnksr1;tcf7l2;fgf10a;hey2;psme4a;hdac7b		R-HSA-6802919;R-HSA-6802918;R-HSA-2023455;R-HSA-6802914;R-HSA-2023451;R-HSA-6802912;R-HSA-5655262;R-HSA-6802926;R-HSA-5655263;R-HSA-5654748;R-HSA-6802925;R-HSA-6802922;R-HSA-6802921;R-HSA-6802935;R-HSA-6802934;R-HSA-6802933;R-HSA-6802932;R-HSA-2220981;R-HSA-5655233;R-HSA-2220982;R-HSA-6802943;R-HSA-6802942;R-HSA-5655247;R-HSA-5655244;R-HSA-5655245;R-HSA-5655243;R-HSA-5655240;R-HSA-5655241;R-HSA-5…
R-HSA-8978868	Fatty acid metabolism	7	429	0.0306801	0.954087	0.954087	24	217	0.0184086	-1.8661	9606	Homo sapiens	hadhb;ptgr1;slc22a21;alox12;elovl1a;acadvl		R-HSA-165026;R-HSA-2161794;R-HSA-77283;R-HSA-2162019;R-HSA-548800;R-HSA-77321;R-HSA-2161964;R-HSA-77329;R-HSA-2046094;R-HSA-77299;R-HSA-2162002;R-HSA-77301;R-HSA-548830;R-HSA-77271;R-HSA-77303;R-HSA-2046088;R-HSA-77304;R-HSA-109339;R-HSA-2161948;R-HSA-77277;R-HSA-77309;R-HSA-77340;R-HSA-2161567;R-HSA-109342
R-HSA-71291	Metabolism of amino acids and derivatives	12	660	0.0472002	0.956083	0.956083	13	283	0.0240075	-2.15573	9606	Homo sapiens	gls2b;bckdk;ckmb;bhmt;dmgdh;tdh;dbh;zgc:158423;psme4a;ASS1;ftcd		R-HSA-209891;R-HSA-353125;R-HSA-1614654;R-HSA-70920;R-HSA-5693148;R-HSA-6798667;R-HSA-352232;R-HSA-6798345;R-HSA-70609;R-HSA-5696838;R-HSA-70577;R-HSA-6797653;R-HSA-200318
R-HSA-1912422	Pre-NOTCH Expression and Processing	1	113	0.00808124	0.957073	0.957073	3	38	0.00322362	-3.2149	9606	Homo sapiens	elf3		R-HSA-1912415;R-HSA-9021357;R-HSA-9021364
R-HSA-168179	Toll Like Receptor TLR1:TLR2 Cascade	1	113	0.00808124	0.957073	0.957073	1	65	0.00551408	-3.80806	9606	Homo sapiens	sigirr		R-HSA-166072
R-HSA-181438	Toll Like Receptor 2 (TLR2) Cascade	1	113	0.00808124	0.957073	0.957073	1	67	0.00568375	-3.80806	9606	Homo sapiens	sigirr		R-HSA-166072
R-HSA-2559580	Oxidative Stress Induced Senescence	1	114	0.00815276	0.958257	0.958257	1	39	0.00330845	-2.18713	9606	Homo sapiens	txn		R-HSA-3225851
R-HSA-376176	Signaling by ROBO receptors	3	235	0.0168061	0.958806	0.958806	3	60	0.00508992	-1.82999	9606	Homo sapiens	col4a5;cxcr4a;psme4a		R-HSA-9010396;R-HSA-9011313;R-HSA-8986258
R-HSA-112316	Neuronal System	7	436	0.0311807	0.958918	0.958918	18	163	0.0138276	-3.26744	9606	Homo sapiens	gls2b;ptprfb;kcnj16;KCNJ15;glra4a;nrxn3a		R-HSA-6794338;R-HSA-8855648;R-HSA-6797568;R-HSA-6794348;R-HSA-6794346;R-HSA-6794345;R-HSA-6794344;R-HSA-70609;R-HSA-6797974;R-HSA-6794357;R-HSA-975389;R-HSA-1013020;R-HSA-6798258;R-HSA-6797554;R-HSA-6794353;R-HSA-6794352;R-HSA-388824;R-HSA-1296045
R-HSA-69242	S Phase	2	179	0.0128013	0.959319	0.959319	5	54	0.00458093	-0.306724	9606	Homo sapiens	cdh1;psme4a		R-HSA-75825;R-HSA-68948;R-HSA-69015;R-HSA-69016;R-HSA-187948
R-HSA-109581	Apoptosis	2	180	0.0128728	0.96026	0.96026	2	126	0.0106888	-0.306724	9606	Homo sapiens	cdh1;psme4a		R-HSA-211715;R-HSA-202939
R-HSA-112315	Transmission across Chemical Synapses	4	290	0.0207395	0.960395	0.960395	3	110	0.00933152	-4.25077	9606	Homo sapiens	gls2b;kcnj16;KCNJ15;glra4a		R-HSA-70609;R-HSA-975389;R-HSA-1013020
R-HSA-76002	Platelet activation, signaling and aggregation	4	293	0.020954	0.962612	0.962612	4	114	0.00967085	-4.05683	9606	Homo sapiens	plg;f2;tfa;islr2		R-HSA-482770;R-HSA-481007;R-HSA-114697;R-HSA-429529
R-HSA-8878159	Transcriptional regulation by RUNX3	1	118	0.00843882	0.962677	0.962677	5	47	0.00398711	-1.2062	9606	Homo sapiens	tcf7l2		R-HSA-4411367;R-HSA-8951442;R-HSA-8951443;R-HSA-8951428;R-HSA-4411357
R-HSA-418346	Platelet homeostasis	1	118	0.00843882	0.962677	0.962677	1	30	0.00254496	-3.03802	9606	Homo sapiens	kcnma1a		R-HSA-418549
R-HSA-9010553	Regulation of expression of SLITs and ROBOs	2	183	0.0130873	0.962959	0.962959	2	20	0.00169664	-0.828872	9606	Homo sapiens	col4a5;psme4a		R-HSA-9010396;R-HSA-9011313
R-HSA-5357801	Programmed Cell Death	2	188	0.0134449	0.967071	0.967071	2	139	0.0117917	-0.306724	9606	Homo sapiens	cdh1;psme4a		R-HSA-211715;R-HSA-202939
R-HSA-1474165	Reproduction	1	123	0.0087964	0.967552	0.967552	1	24	0.00203597	-3.35654	9606	Homo sapiens	zgc:174164		R-HSA-1297338
R-HSA-202424	Downstream TCR signaling	1	124	0.00886791	0.968447	0.968447	1	24	0.00203597	0.895261	9606	Homo sapiens	psme4a		R-HSA-5607724
R-HSA-382556	ABC-family proteins mediated transport	1	124	0.00886791	0.968447	0.968447	1	28	0.0023753	0.895261	9606	Homo sapiens	psme4a		R-HSA-8866553
R-HSA-6803157	Antimicrobial peptides	1	124	0.00886791	0.968447	0.968447	2	58	0.00492026	-3.08489	9606	Homo sapiens	tfa		R-HSA-6810643;R-HSA-1222491
R-HSA-983705	Signaling by the B Cell Receptor (BCR)	2	190	0.0135879	0.96859	0.96859	2	43	0.00364778	-0.65761	9606	Homo sapiens	ahcyl1;psme4a		R-HSA-169683;R-HSA-1168640
R-HSA-4420097	VEGFA-VEGFR2 Pathway	1	125	0.00893943	0.969318	0.969318	1	77	0.00653207	-2.21048	9606	Homo sapiens	ahcyl1		R-HSA-169683
R-HSA-196849	Metabolism of water-soluble vitamins and cofactors	3	252	0.0180219	0.971202	0.971202	3	140	0.0118765	-3.58365	9606	Homo sapiens	cubn;slc23a1		R-HSA-3000137;R-HSA-198870;R-HSA-3000103
R-HSA-15869	Metabolism of nucleotides	3	254	0.0181649	0.972403	0.972403	6	135	0.0114523	-1.03883	9606	Homo sapiens	atic;ampd3b;txn		R-HSA-73797;R-HSA-111751;R-HSA-73798;R-HSA-111804;R-HSA-76590;R-HSA-73646
R-HSA-382551	Transport of small molecules	18	960	0.0686548	0.97245	0.97245	33	430	0.0364778	-4.62169	9606	Homo sapiens	slc5a2;ano1;nipal4;slc20a1a;slc22a21;myo5b;asic2;lsr;zgc:158423;tfa;psme4a;cubn;slc5a12;slc2a12;slc34a1a;slc26a1;slc6a14		R-HSA-8863494;R-HSA-917839;R-HSA-8933258;R-HSA-917835;R-HSA-264834;R-HSA-376200;R-HSA-2684901;R-HSA-917888;R-HSA-427656;R-HSA-379415;R-HSA-427605;R-HSA-378513;R-HSA-5336453;R-HSA-264848;R-HSA-5691150;R-HSA-189208;R-HSA-8876312;R-HSA-429094;R-HSA-917807;R-HSA-8933292;R-HSA-2671885;R-HSA-427555;R-HSA-379426;R-HSA-432237;R-HSA-429613;R-HSA-917987;R-HSA-352232;R-HSA-549241;R-HSA-917814;R-HSA-549297;R…
R-HSA-2871809	FCERI mediated Ca+2 mobilization	1	129	0.00922549	0.97257	0.97257	1	11	0.000933152	-2.21048	9606	Homo sapiens	ahcyl1		R-HSA-169683
R-HSA-2029485	Role of phospholipids in phagocytosis	1	129	0.00922549	0.97257	0.97257	1	12	0.00101798	-2.21048	9606	Homo sapiens	ahcyl1		R-HSA-169683
R-HSA-162906	HIV Infection	3	260	0.018594	0.975729	0.975729	11	158	0.0134035	-1.70032	9606	Homo sapiens	ap1s3b;cxcr4a;psme4a		R-HSA-164515;R-HSA-182263;R-HSA-182279;R-HSA-164500;R-HSA-164507;R-HSA-180603;R-HSA-164521;R-HSA-182286;R-HSA-164524;R-HSA-164508;R-HSA-180573
R-HSA-194138	Signaling by VEGF	1	134	0.00958307	0.976155	0.976155	1	83	0.00704106	-2.21048	9606	Homo sapiens	ahcyl1		R-HSA-169683
R-HSA-5621481	C-type lectin receptors (CLRs)	2	202	0.0144461	0.976383	0.976383	3	68	0.00576858	-0.65761	9606	Homo sapiens	ahcyl1;psme4a		R-HSA-169683;R-HSA-5607731;R-HSA-5607724
R-HSA-68877	Mitotic Prometaphase	2	207	0.0148037	0.979046	0.979046	7	15	0.00127248	-2.28958	9606	Homo sapiens	TUBB4B		R-HSA-2484822;R-HSA-375302;R-HSA-380316;R-HSA-380508;R-HSA-1638803;R-HSA-2468287;R-HSA-1638821
R-HSA-983712	Ion channel transport	2	207	0.0148037	0.979046	0.979046	3	39	0.00330845	-3.66731	9606	Homo sapiens	ano1;asic2		R-HSA-8863494;R-HSA-2671885;R-HSA-2684901
R-HSA-70326	Glucose metabolism	1	139	0.00994064	0.979272	0.979272	6	50	0.0042416	0.694976	9606	Homo sapiens	myl7		R-HSA-70420;R-HSA-170810;R-HSA-170824;R-HSA-170825;R-HSA-170799;R-HSA-170796
R-HSA-5617833	Cilium Assembly	2	208	0.0148752	0.979543	0.979543	16	50	0.0042416	-2.28958	9606	Homo sapiens	TUBB4B		R-HSA-5624949;R-HSA-5626228;R-HSA-5625424;R-HSA-5626227;R-HSA-5625426;R-HSA-5626681;R-HSA-5617816;R-HSA-5624952;R-HSA-5618328;R-HSA-5618331;R-HSA-5638009;R-HSA-5625421;R-HSA-5626220;R-HSA-5626223;R-HSA-5625416;R-HSA-5626699
R-HSA-6798695	Neutrophil degranulation	7	480	0.0343274	0.980135	0.980135	8	10	0.00084832	-1.96028	9606	Homo sapiens	ampd3b;vamp8;gstp1;lrmp;padi2;TUBB4B;tfa		R-HSA-6799350;R-HSA-6798739;R-HSA-6800434;R-HSA-6798751;R-HSA-6798749;R-HSA-6798748;R-HSA-6798747;R-HSA-6798745
R-HSA-163685	Integration of energy metabolism	1	143	0.0102267	0.98147	0.98147	1	65	0.00551408	-2.21048	9606	Homo sapiens	ahcyl1		R-HSA-169683
R-HSA-422475	Axon guidance	9	583	0.0416935	0.981886	0.981886	37	297	0.0251951	-1.97018	9606	Homo sapiens	col4a5;cxcr4a;col6a1;epha3;TUBB4B;plxna4;psme4a;sema7a		R-HSA-399942;R-HSA-399941;R-HSA-399939;R-HSA-399951;R-HSA-445071;R-HSA-399946;R-HSA-399947;R-HSA-399944;R-HSA-3928628;R-HSA-445077;R-HSA-416723;R-HSA-9010396;R-HSA-399952;R-HSA-8986258;R-HSA-3928602;R-HSA-3928607;R-HSA-3928604;R-HSA-434990;R-HSA-375151;R-HSA-434989;R-HSA-3928597;R-HSA-3928660;R-HSA-3928651;R-HSA-4093327;R-HSA-3928584;R-HSA-3928648;R-HSA-3928591;R-HSA-399934;R-HSA-9011313;R-HSA-39…
R-HSA-194840	Rho GTPase cycle	1	144	0.0102982	0.981983	0.981983	1	5	0.00042416	-1.48086	9606	Homo sapiens	arhgap12a		R-HSA-194922
R-HSA-202403	TCR signaling	1	146	0.0104413	0.982965	0.982965	1	52	0.00441127	0.895261	9606	Homo sapiens	psme4a		R-HSA-5607724
R-HSA-6811442	Intra-Golgi and retrograde Golgi-to-ER traffic	2	218	0.0155904	0.983922	0.983922	4	48	0.00407194	-2.28958	9606	Homo sapiens	TUBB4B		R-HSA-8849350;R-HSA-6811426;R-HSA-6811423;R-HSA-8849353
R-HSA-948021	Transport to the Golgi and subsequent modification	2	219	0.0156619	0.984306	0.984306	2	60	0.00508992	-2.28958	9606	Homo sapiens	TUBB4B		R-HSA-6809006;R-HSA-6809003
R-HSA-1483206	Glycerophospholipid biosynthesis	2	222	0.0158764	0.985406	0.985406	2	133	0.0112827	0.694529	9606	Homo sapiens	hadhb;pla1a		R-HSA-1482775;R-HSA-8869425
R-HSA-69481	G2/M Checkpoints	1	154	0.0110134	0.986389	0.986389	1	24	0.00203597	0.895261	9606	Homo sapiens	psme4a		R-HSA-8852354
R-HSA-5688426	Deubiquitination	3	288	0.0205964	0.986814	0.986814	5	77	0.00653207	-0.0367915	9606	Homo sapiens	gata3;usp28;psme4a		R-HSA-5696914;R-HSA-5689539;R-HSA-5665854;R-HSA-5665871;R-HSA-6783177
R-HSA-9006925	Intracellular signaling by second messengers	4	351	0.0251019	0.988261	0.988261	3	105	0.00890736	-2.04832	9606	Homo sapiens	fgf4;fgf10a;ahcyl1;psme4a		R-HSA-2316434;R-HSA-169683;R-HSA-8850992
R-HSA-2262752	Cellular responses to stress	7	512	0.0366159	0.988608	0.988608	15	184	0.0156091	-1.4237	9606	Homo sapiens	cdh1;id1;gstp1;txn;TUBB4B;psme4a		R-HSA-3790137;R-HSA-3697882;R-HSA-8979082;R-HSA-3343700;R-HSA-3225851;R-HSA-3790130;R-HSA-3788725;R-HSA-3341343;R-HSA-3788724;R-HSA-73646;R-HSA-5618080;R-HSA-3788705;R-HSA-3209165;R-HSA-1234159;R-HSA-3788708
R-HSA-2454202	Fc epsilon receptor (FCERI) signaling	2	234	0.0167346	0.989104	0.989104	2	63	0.00534442	-0.65761	9606	Homo sapiens	ahcyl1;psme4a		R-HSA-169683;R-HSA-5607724
R-HSA-6807070	PTEN Regulation	1	171	0.0122291	0.991555	0.991555	1	56	0.00475059	0.895261	9606	Homo sapiens	psme4a		R-HSA-8850992
R-HSA-1257604	PIP3 activates AKT signaling	3	312	0.0223128	0.992284	0.992284	2	86	0.00729555	-1.99426	9606	Homo sapiens	fgf4;fgf10a;psme4a		R-HSA-2316434;R-HSA-8850992
R-HSA-5576891	Cardiac conduction	1	175	0.0125152	0.992452	0.992452	2	26	0.00220563	-2.21048	9606	Homo sapiens	ahcyl1		R-HSA-169683;R-HSA-5226904
R-HSA-2871837	FCERI mediated NF-kB activation	1	175	0.0125152	0.992452	0.992452	1	19	0.00161181	0.895261	9606	Homo sapiens	psme4a		R-HSA-5607724
R-HSA-162587	HIV Life Cycle	1	175	0.0125152	0.992452	0.992452	6	115	0.00975568	-3.83223	9606	Homo sapiens	cxcr4a		R-HSA-164515;R-HSA-164500;R-HSA-164507;R-HSA-164521;R-HSA-164524;R-HSA-164508
R-HSA-5663205	Infectious disease	7	537	0.0384038	0.992729	0.992729	21	330	0.0279946	-2.60742	9606	Homo sapiens	star;cdh1;eef2l2;ap1s3b;cxcr4a;tfa;psme4a		R-HSA-164515;R-HSA-1222641;R-HSA-182279;R-HSA-8876993;R-HSA-8951552;R-HSA-164521;R-HSA-8936356;R-HSA-182286;R-HSA-112333;R-HSA-8877003;R-HSA-164524;R-HSA-8876948;R-HSA-5336421;R-HSA-8951549;R-HSA-182263;R-HSA-164500;R-HSA-8876497;R-HSA-164507;R-HSA-180603;R-HSA-164508;R-HSA-180573
R-HSA-195258	RHO GTPase Effectors	3	316	0.0225989	0.99295	0.99295	3	107	0.00907703	-2.02929	9606	Homo sapiens	cdh1;TUBB4B		R-HSA-5672304;R-HSA-5666169;R-HSA-5672329
R-HSA-3108232	SUMO E3 ligases SUMOylate target proteins	1	178	0.0127297	0.993063	0.993063	3	130	0.0110282	0.808928	9606	Homo sapiens	top2a		R-HSA-4641350;R-HSA-5228525;R-HSA-4641342
R-HSA-202733	Cell surface interactions at the vascular wall	2	256	0.0183079	0.99366	0.99366	2	64	0.00542925	-4.66204	9606	Homo sapiens	f2;zgc:158423		R-HSA-141040;R-HSA-375131
R-HSA-8957322	Metabolism of steroids	3	321	0.0229564	0.993706	0.993706	12	234	0.0198507	-6.95092	9606	Homo sapiens	cubn;hsd3b1;star		R-HSA-8963864;R-HSA-193073;R-HSA-209760;R-HSA-196086;R-HSA-196372;R-HSA-193961;R-HSA-350158;R-HSA-196126;R-HSA-196350;R-HSA-350168;R-HSA-193052;R-HSA-350186
R-HSA-1630316	Glycosaminoglycan metabolism	1	182	0.0130158	0.9938	0.9938	1	82	0.00695623	-4.20043	9606	Homo sapiens	slc26a1		R-HSA-427555
R-HSA-2990846	SUMOylation	1	187	0.0133734	0.994614	0.994614	3	139	0.0117917	0.808928	9606	Homo sapiens	top2a		R-HSA-4641350;R-HSA-5228525;R-HSA-4641342
R-HSA-2029480	Fcgamma receptor (FCGR) dependent phagocytosis	1	193	0.0138025	0.99545	0.99545	1	42	0.00356295	-2.21048	9606	Homo sapiens	ahcyl1		R-HSA-169683
R-HSA-71387	Metabolism of carbohydrates	4	413	0.0295359	0.996853	0.996853	10	213	0.0180692	-1.70238	9606	Homo sapiens	myl7;sord;slc26a1;ugp2b		R-HSA-5662471;R-HSA-70420;R-HSA-427555;R-HSA-5652195;R-HSA-170810;R-HSA-170824;R-HSA-170825;R-HSA-170799;R-HSA-170796;R-HSA-70286
R-HSA-1266738	Developmental Biology	19	1177	0.0841736	0.997221	0.997221	85	484	0.0410587	-2.35069	9606	Homo sapiens	sox2;myl7;cxcr4a;krt17;epha3;TUBB4B;plxna4;psme4a;sema7a;foxa3;fgf10a;col4a5;col6a1;pkp3a		R-HSA-6814695;R-HSA-2972975;R-HSA-6806629;R-HSA-480515;R-HSA-2972965;R-HSA-452750;R-HSA-445071;R-HSA-2972964;R-HSA-2972967;R-HSA-2972966;R-HSA-2972960;R-HSA-3928628;R-HSA-2972962;R-HSA-211346;R-HSA-6810357;R-HSA-445077;R-HSA-8942224;R-HSA-452894;R-HSA-211482;R-HSA-8986258;R-HSA-2972977;R-HSA-2972979;R-HSA-2972978;R-HSA-6800120;R-HSA-3928602;R-HSA-6805573;R-HSA-3928607;R-HSA-452515;R-HSA-3928604;R…
R-HSA-5668914	Diseases of metabolism	1	217	0.0155188	0.997685	0.997685	2	114	0.00967085	-6.12304	9606	Homo sapiens	cubn		R-HSA-3296462;R-HSA-3296477
R-HSA-8953897	Cellular responses to external stimuli	7	599	0.0428377	0.997727	0.997727	15	254	0.0215473	-1.4237	9606	Homo sapiens	cdh1;id1;gstp1;txn;TUBB4B;psme4a		R-HSA-3790137;R-HSA-3697882;R-HSA-8979082;R-HSA-3343700;R-HSA-3225851;R-HSA-3790130;R-HSA-3788725;R-HSA-3341343;R-HSA-3788724;R-HSA-73646;R-HSA-5618080;R-HSA-3788705;R-HSA-3209165;R-HSA-1234159;R-HSA-3788708
R-HSA-418594	G alpha (i) signalling events	6	557	0.0398341	0.998252	0.998252	7	147	0.0124703	-2.5371	9606	Homo sapiens	dhrs3a;ackr3b;rgs4;rdh10a;cxcr4a;ahcyl1		R-HSA-2465940;R-HSA-169683;R-HSA-392212;R-HSA-749454;R-HSA-74872;R-HSA-749456;R-HSA-380073
R-HSA-196854	Metabolism of vitamins and cofactors	3	381	0.0272474	0.998434	0.998434	3	201	0.0170512	-3.58365	9606	Homo sapiens	cubn;slc23a1		R-HSA-3000137;R-HSA-198870;R-HSA-3000103
R-HSA-194315	Signaling by Rho GTPases	4	447	0.0319674	0.998513	0.998513	4	112	0.00950119	-1.89218	9606	Homo sapiens	cdh1;arhgap12a;TUBB4B		R-HSA-5672304;R-HSA-194922;R-HSA-5666169;R-HSA-5672329
R-HSA-983168	Antigen processing: Ubiquitination & Proteasome degradation	2	315	0.0225274	0.998561	0.998561	5	9	0.000763488	-0.306724	9606	Homo sapiens	cdh1;psme4a		R-HSA-983150;R-HSA-983147;R-HSA-983157;R-HSA-983156;R-HSA-983140
R-HSA-1483257	Phospholipid metabolism	2	315	0.0225274	0.998561	0.998561	2	218	0.0184934	0.694529	9606	Homo sapiens	hadhb;pla1a		R-HSA-1482775;R-HSA-8869425
R-HSA-69278	Cell Cycle, Mitotic	6	570	0.0407638	0.998658	0.998658	54	322	0.0273159	-0.59579	9606	Homo sapiens	top2a;cdh1;TUBB4B;psme4a		R-HSA-375302;R-HSA-380294;R-HSA-174209;R-HSA-8852354;R-HSA-1638803;R-HSA-380303;R-HSA-174088;R-HSA-380311;R-HSA-174097;R-HSA-69015;R-HSA-380316;R-HSA-69016;R-HSA-2468287;R-HSA-8853405;R-HSA-8854044;R-HSA-174105;R-HSA-188191;R-HSA-380455;R-HSA-174122;R-HSA-174251;R-HSA-8853419;R-HSA-174255;R-HSA-174124;R-HSA-187948;R-HSA-8854071;R-HSA-75825;R-HSA-174139;R-HSA-8964531;R-HSA-1638821;R-HSA-8852280;R-…
R-HSA-68886	M Phase	3	390	0.027891	0.998735	0.998735	10	66	0.00559891	-1.22796	9606	Homo sapiens	TUBB4B;psme4a		R-HSA-2484822;R-HSA-375302;R-HSA-2467809;R-HSA-2467811;R-HSA-174202;R-HSA-380316;R-HSA-380508;R-HSA-1638803;R-HSA-2468287;R-HSA-1638821
R-HSA-8951664	Neddylation	1	241	0.0172352	0.998824	0.998824	2	31	0.00262979	0.895261	9606	Homo sapiens	psme4a		R-HSA-8956184;R-HSA-8956140
R-HSA-449147	Signaling by Interleukins	7	640	0.0457699	0.998983	0.998983	7	491	0.0416525	-2.30303	9606	Homo sapiens	sox2;gata3;alox12;sigirr;psme4a		R-HSA-6793975;R-HSA-6797269;R-HSA-6790036;R-HSA-9008684;R-HSA-209061;R-HSA-9008577;R-HSA-9009072
R-HSA-983169	Class I MHC mediated antigen processing & presentation	4	464	0.0331832	0.998984	0.998984	9	48	0.00407194	-0.792095	9606	Homo sapiens	cdh1;vamp8;ctsla;psme4a		R-HSA-983150;R-HSA-8863973;R-HSA-983147;R-HSA-1236935;R-HSA-1236948;R-HSA-1236970;R-HSA-983157;R-HSA-983156;R-HSA-983140
R-HSA-1852241	Organelle biogenesis and maintenance	2	335	0.0239577	0.999137	0.999137	16	86	0.00729555	-2.28958	9606	Homo sapiens	TUBB4B		R-HSA-5624949;R-HSA-5626228;R-HSA-5625424;R-HSA-5626227;R-HSA-5625426;R-HSA-5626681;R-HSA-5617816;R-HSA-5624952;R-HSA-5618328;R-HSA-5618331;R-HSA-5638009;R-HSA-5625421;R-HSA-5626220;R-HSA-5626223;R-HSA-5625416;R-HSA-5626699
R-HSA-109582	Hemostasis	10	812	0.0580705	0.999163	0.999163	41	327	0.0277401	-3.18114	9606	Homo sapiens	kcnma1a;serpine2;gata3;plg;TUBB4B;f2;zgc:158423;tfa;islr2		R-HSA-158722;R-HSA-158784;R-HSA-158721;R-HSA-158982;R-HSA-140870;R-HSA-114697;R-HSA-158795;R-HSA-140872;R-HSA-158925;R-HSA-158419;R-HSA-158800;R-HSA-983259;R-HSA-482770;R-HSA-5578883;R-HSA-158747;R-HSA-158744;R-HSA-140696;R-HSA-9015379;R-HSA-996755;R-HSA-158942;R-HSA-158750;R-HSA-140700;R-HSA-375131;R-HSA-158941;R-HSA-159005;R-HSA-429529;R-HSA-158756;R-HSA-481007;R-HSA-140840;R-HSA-158766;R-HSA-9…
R-HSA-4839726	Chromatin organization	1	257	0.0183795	0.999252	0.999252	2	84	0.00712589	-2.52631	9606	Homo sapiens	padi2		R-HSA-3247569;R-HSA-1183128
R-HSA-3247509	Chromatin modifying enzymes	1	257	0.0183795	0.999252	0.999252	2	84	0.00712589	-2.52631	9606	Homo sapiens	padi2		R-HSA-3247569;R-HSA-1183128
R-HSA-3700989	Transcriptional Regulation by TP53	4	486	0.0347565	0.999384	0.999384	6	259	0.0219715	-1.15343	9606	Homo sapiens	rgcc;gls2b;txn		R-HSA-70609;R-HSA-5632924;R-HSA-6803917;R-HSA-3341343;R-HSA-6803914;R-HSA-73646
R-HSA-416476	G alpha (q) signalling events	1	274	0.0195952	0.999537	0.999537	3	29	0.00246013	-4.20427	9606	Homo sapiens	f2		R-HSA-749448;R-HSA-749452;R-HSA-379048
R-HSA-69620	Cell Cycle Checkpoints	1	279	0.0199528	0.999598	0.999598	3	57	0.00483543	0.895261	9606	Homo sapiens	psme4a		R-HSA-69600;R-HSA-8852354;R-HSA-264458
R-HSA-373076	Class A/1 (Rhodopsin-like receptors)	3	438	0.0313238	0.999601	0.999601	2	146	0.0123855	-3.3129	9606	Homo sapiens	ackr3b;cxcr4a;f2		R-HSA-389463;R-HSA-374214
R-HSA-199991	Membrane Trafficking	6	661	0.0472717	0.999803	0.999803	44	218	0.0184934	-2.24734	9606	Homo sapiens	dab2;vamp8;ap1s3b;TUBB4B;tfa		R-HSA-8868230;R-HSA-421831;R-HSA-8849350;R-HSA-432706;R-HSA-432707;R-HSA-6811426;R-HSA-6809006;R-HSA-421836;R-HSA-8868236;R-HSA-5333658;R-HSA-6809003;R-HSA-421835;R-HSA-432712;R-HSA-8849353;R-HSA-421833;R-HSA-2316347;R-HSA-8867613;R-HSA-8871194;R-HSA-8871193;R-HSA-190877;R-HSA-8868071;R-HSA-8866277;R-HSA-8863471;R-HSA-376364;R-HSA-8867756;R-HSA-8868651;R-HSA-8867754;R-HSA-8868072;R-HSA-8868648;R-…
R-HSA-211859	Biological oxidations	4	547	0.0391189	0.99985	0.99985	5	186	0.0157788	-1.9378	9606	Homo sapiens	sult6b1;gstp1;slc26a1;ugp2b		R-HSA-176054;R-HSA-427555;R-HSA-176474;R-HSA-176585;R-HSA-70286
R-HSA-198933	Immunoregulatory interactions between a Lymphoid and a non-Lymphoid cell	1	316	0.0225989	0.999859	0.999859	1	43	0.00364778	-1.50871	9606	Homo sapiens	cdh1		R-HSA-199079
R-HSA-1640170	Cell Cycle	6	682	0.0487735	0.999875	0.999875	56	411	0.034866	-0.59579	9606	Homo sapiens	top2a;cdh1;TUBB4B;psme4a		R-HSA-375302;R-HSA-380294;R-HSA-174209;R-HSA-8852354;R-HSA-1638803;R-HSA-380303;R-HSA-174088;R-HSA-264458;R-HSA-380311;R-HSA-174097;R-HSA-69015;R-HSA-380316;R-HSA-69016;R-HSA-2468287;R-HSA-8853405;R-HSA-8854044;R-HSA-174105;R-HSA-188191;R-HSA-380455;R-HSA-174122;R-HSA-174251;R-HSA-8853419;R-HSA-174255;R-HSA-174124;R-HSA-187948;R-HSA-8854071;R-HSA-75825;R-HSA-174139;R-HSA-8964531;R-HSA-1638821;R-H…
R-HSA-500792	GPCR ligand binding	5	629	0.0449832	0.999899	0.999899	4	173	0.0146759	-3.23533	9606	Homo sapiens	wnt2;ackr3b;cxcr4a;ptch2;f2		R-HSA-389463;R-HSA-445124;R-HSA-374214;R-HSA-201708
R-HSA-446203	Asparagine N-linked glycosylation	2	421	0.030108	0.999908	0.999908	2	143	0.012131	-2.28958	9606	Homo sapiens	TUBB4B		R-HSA-6809006;R-HSA-6809003
R-HSA-1643685	Disease	20	1525	0.109061	0.999978	0.999978	97	953	0.0808449	-2.98007	9606	Homo sapiens	fgf4;slc5a2;cnksr1;star;cdh1;myl7;eef2l2;hey2;slc22a21;ap1s3b;cxcr4a;tfa;psme4a;hdac7b;cubn;tcf7l2;fgf10a;slc34a1a;slc6a14		R-HSA-2023455;R-HSA-182279;R-HSA-2023451;R-HSA-182286;R-HSA-8876948;R-HSA-5625674;R-HSA-8936356;R-HSA-2400009;R-HSA-4396402;R-HSA-5336421;R-HSA-6803234;R-HSA-5655315;R-HSA-6803233;R-HSA-8876993;R-HSA-5655326;R-HSA-5659674;R-HSA-8877003;R-HSA-5655323;R-HSA-5655320;R-HSA-2033488;R-HSA-2033486;R-HSA-5655301;R-HSA-8876497;R-HSA-2033474;R-HSA-2033472;R-HSA-180573;R-HSA-5658163;R-HSA-5661474;R-HSA-5334…
R-HSA-168249	Innate Immune System	15	1302	0.0931131	0.999988	0.999988	31	651	0.0552257	-2.50202	9606	Homo sapiens	vamp8;gstp1;sarm1;txn;padi2;TUBB4B;f2;ahcyl1;sigirr;tfa;psme4a;ampd3b;c9;lrmp;ctsla		R-HSA-1222491;R-HSA-1250264;R-HSA-173709;R-HSA-6799350;R-HSA-169683;R-HSA-6800434;R-HSA-936985;R-HSA-173723;R-HSA-173720;R-HSA-2201338;R-HSA-168921;R-HSA-2530429;R-HSA-1678981;R-HSA-1250253;R-HSA-173725;R-HSA-8852580;R-HSA-5607731;R-HSA-2530445;R-HSA-8852716;R-HSA-6810643;R-HSA-6798739;R-HSA-2559568;R-HSA-6798751;R-HSA-9014320;R-HSA-5607724;R-HSA-6798749;R-HSA-166072;R-HSA-6798748;R-HSA-1250280;R…
R-HSA-1280218	Adaptive Immune System	9	997	0.0713009	0.999993	0.999993	21	261	0.0221412	-1.51452	9606	Homo sapiens	cdh1;vamp8;ap1s3b;TUBB4B;ahcyl1;ctsla;psme4a		R-HSA-2213248;R-HSA-983150;R-HSA-8863973;R-HSA-8951498;R-HSA-199079;R-HSA-983147;R-HSA-1236948;R-HSA-2130504;R-HSA-983140;R-HSA-2130349;R-HSA-2130641;R-HSA-169683;R-HSA-1168640;R-HSA-2130706;R-HSA-2213236;R-HSA-1236935;R-HSA-1236970;R-HSA-5607724;R-HSA-983157;R-HSA-2130619;R-HSA-983156
R-HSA-5653656	Vesicle-mediated transport	6	820	0.0586426	0.999995	0.999995	44	251	0.0212928	-2.24734	9606	Homo sapiens	dab2;vamp8;ap1s3b;TUBB4B;tfa		R-HSA-8868230;R-HSA-421831;R-HSA-8849350;R-HSA-432706;R-HSA-432707;R-HSA-6811426;R-HSA-6809006;R-HSA-421836;R-HSA-8868236;R-HSA-5333658;R-HSA-6809003;R-HSA-421835;R-HSA-432712;R-HSA-8849353;R-HSA-421833;R-HSA-2316347;R-HSA-8867613;R-HSA-8871194;R-HSA-8871193;R-HSA-190877;R-HSA-8868071;R-HSA-8866277;R-HSA-8863471;R-HSA-376364;R-HSA-8867756;R-HSA-8868651;R-HSA-8867754;R-HSA-8868072;R-HSA-8868648;R-…
R-HSA-1280215	Cytokine Signaling in Immune system	8	1055	0.0754488	1	1	25	639	0.0542077	-1.92389	9606	Homo sapiens	ghrb;sox2;gata3;alox12;sigirr;psme4a		R-HSA-1168789;R-HSA-982792;R-HSA-9008577;R-HSA-6793975;R-HSA-1168768;R-HSA-982810;R-HSA-5668481;R-HSA-1168777;R-HSA-1168456;R-HSA-982807;R-HSA-1168459;R-HSA-1362485;R-HSA-9008684;R-HSA-209061;R-HSA-5607731;R-HSA-1168767;R-HSA-6797269;R-HSA-6790036;R-HSA-982778;R-HSA-1362465;R-HSA-1168423;R-HSA-982775;R-HSA-9009072;R-HSA-982768;R-HSA-5668520
R-HSA-212436	Generic Transcription Pathway	14	1454	0.103983	1	1	25	726	0.0615881	-1.3011	9606	Homo sapiens	rgcc;gls2b;sox2;hey2;txn;bmp2b;psme4a;lmo1;tcf7l2;gata3;nr2f1a;cited4a;ctsla		R-HSA-8956608;R-HSA-5632924;R-HSA-9008832;R-HSA-8951428;R-HSA-70609;R-HSA-8956568;R-HSA-9615554;R-HSA-9007707;R-HSA-8957265;R-HSA-8951442;R-HSA-8951443;R-HSA-9009362;R-HSA-4411357;R-HSA-8956586;R-HSA-9615536;R-HSA-4411367;R-HSA-376419;R-HSA-9008110;R-HSA-6803917;R-HSA-3341343;R-HSA-6803914;R-HSA-73646;R-HSA-8938108;R-HSA-8864307;R-HSA-9008177
R-HSA-556833	Metabolism of lipids	13	1433	0.102482	1	1	55	942	0.0799118	-3.03162	9606	Homo sapiens	cubn;hadhb;ptgr1;hsd3b1;star;degs2;arsj;slc22a21;pla1a;alox12;elovl1a;acadvl		R-HSA-1482775;R-HSA-1614362;R-HSA-77321;R-HSA-9025152;R-HSA-2161964;R-HSA-8963864;R-HSA-77329;R-HSA-2046094;R-HSA-9018907;R-HSA-2161844;R-HSA-196372;R-HSA-2046088;R-HSA-109339;R-HSA-196126;R-HSA-77340;R-HSA-193052;R-HSA-109342;R-HSA-165026;R-HSA-2161794;R-HSA-193961;R-HSA-9025957;R-HSA-193073;R-HSA-8869425;R-HSA-2161948;R-HSA-2161567;R-HSA-2162019;R-HSA-548800;R-HSA-9020610;R-HSA-350158;R-HSA-216…
R-HSA-597592	Post-translational protein modification	15	1591	0.113781	1	1	26	521	0.0441975	-2.11414	9606	Homo sapiens	rab32a;arsj;vwa1;galnt18b;TUBB4B;f2;bmp2b;tfa;psme4a;top2a;galnt6;gata3;galnt14;usp28		R-HSA-4641350;R-HSA-8870469;R-HSA-1614362;R-HSA-5696914;R-HSA-8870466;R-HSA-913675;R-HSA-8955712;R-HSA-6809006;R-HSA-6809003;R-HSA-159826;R-HSA-8956184;R-HSA-8955869;R-HSA-5689539;R-HSA-5665871;R-HSA-159843;R-HSA-5228525;R-HSA-8956140;R-HSA-5665854;R-HSA-8952289;R-HSA-8865774;R-HSA-8867370;R-HSA-6783177;R-HSA-159728;R-HSA-8955706;R-HSA-4641342;R-HSA-8866105
R-HSA-162582	Signal Transduction	45	3158	0.225846	1	1	265	2130	0.180692	-2.4222	9606	Homo sapiens	rbp5;dhrs3a;spint1a;cdh1;sost;ptch2;f2;ahcyl1;il17rd;hdac7b;tcf7l2;inhbaa;fgf10a;col4a5;gata3;rdh10a;lamc3;hhip;lamc2;spint2;col6a1;elf3;fgf4;cnksr1;wnt2;rgs4;sox2;hey2;hpn;arhgap12a;cxcr4a;plg;TUBB4B;bmp2b;psme4a;fgfbp1b;foxa1;ackr3b;shha;gli1		R-HSA-5654614;R-HSA-5654615;R-HSA-5654612;R-HSA-3322422;R-HSA-5654608;R-HSA-9018497;R-HSA-5654622;R-HSA-3322427;R-HSA-5654623;R-HSA-3322424;R-HSA-9018499;R-HSA-5654620;R-HSA-5654618;R-HSA-3769397;R-HSA-445448;R-HSA-392212;R-HSA-5654596;R-HSA-5654597;R-HSA-5654594;R-HSA-5654592;R-HSA-5654607;R-HSA-5654605;R-HSA-5654603;R-HSA-3640874;R-HSA-5654600;R-HSA-5654646;R-HSA-5654647;R-HSA-5654643;R-HSA-565…
R-HSA-73857	RNA Polymerase II Transcription	14	1593	0.113924	1	1	25	787	0.0667628	-1.3011	9606	Homo sapiens	rgcc;gls2b;sox2;hey2;txn;bmp2b;psme4a;lmo1;tcf7l2;gata3;nr2f1a;cited4a;ctsla		R-HSA-8956608;R-HSA-5632924;R-HSA-9008832;R-HSA-8951428;R-HSA-70609;R-HSA-8956568;R-HSA-9615554;R-HSA-9007707;R-HSA-8957265;R-HSA-8951442;R-HSA-8951443;R-HSA-9009362;R-HSA-4411357;R-HSA-8956586;R-HSA-9615536;R-HSA-4411367;R-HSA-376419;R-HSA-9008110;R-HSA-6803917;R-HSA-3341343;R-HSA-6803914;R-HSA-73646;R-HSA-8938108;R-HSA-8864307;R-HSA-9008177
R-HSA-392499	Metabolism of proteins	26	2342	0.167489	1	1	49	883	0.0749067	-2.40032	9606	Homo sapiens	rab32a;arsj;si:dkey-14d8.20;vwa1;galnt18b;tgfbi;plg;txn;TUBB4B;f2;bmp2b;tfa;psme4a;tcf7l2;top2a;galnt6;sorl1;inhbaa;gata3;galnt14;slc34a1a;acadvl;usp28		R-HSA-4641350;R-HSA-1614362;R-HSA-381446;R-HSA-913675;R-HSA-427656;R-HSA-381461;R-HSA-8956184;R-HSA-5689539;R-HSA-5665871;R-HSA-5228525;R-HSA-5687284;R-HSA-5676917;R-HSA-8867370;R-HSA-6783177;R-HSA-8955706;R-HSA-8866105;R-HSA-8871494;R-HSA-389956;R-HSA-8870469;R-HSA-5696914;R-HSA-8870466;R-HSA-1791069;R-HSA-389955;R-HSA-389954;R-HSA-8955712;R-HSA-389964;R-HSA-6809006;R-HSA-389961;R-HSA-6809003;R-…
R-HSA-74160	Gene expression (Transcription)	14	1751	0.125223	1	1	25	898	0.0761792	-1.3011	9606	Homo sapiens	rgcc;gls2b;sox2;hey2;txn;bmp2b;psme4a;lmo1;tcf7l2;gata3;nr2f1a;cited4a;ctsla		R-HSA-8956608;R-HSA-5632924;R-HSA-9008832;R-HSA-8951428;R-HSA-70609;R-HSA-8956568;R-HSA-9615554;R-HSA-9007707;R-HSA-8957265;R-HSA-8951442;R-HSA-8951443;R-HSA-9009362;R-HSA-4411357;R-HSA-8956586;R-HSA-9615536;R-HSA-4411367;R-HSA-376419;R-HSA-9008110;R-HSA-6803917;R-HSA-3341343;R-HSA-6803914;R-HSA-73646;R-HSA-8938108;R-HSA-8864307;R-HSA-9008177
R-HSA-8953854	Metabolism of RNA	1	782	0.0559251	1	1	1	187	0.0158636	0.895261	9606	Homo sapiens	psme4a		R-HSA-450466
R-HSA-372790	Signaling by GPCR	9	1447	0.103483	1	1	15	388	0.0329148	-2.85164	9606	Homo sapiens	dhrs3a;wnt2;ackr3b;rgs4;rdh10a;cxcr4a;ptch2;f2;ahcyl1		R-HSA-392133;R-HSA-445124;R-HSA-749448;R-HSA-374214;R-HSA-749454;R-HSA-749452;R-HSA-380073;R-HSA-379048;R-HSA-201708;R-HSA-2465940;R-HSA-169683;R-HSA-392212;R-HSA-389463;R-HSA-74872;R-HSA-749456
R-HSA-388396	GPCR downstream signalling	7	1344	0.0961167	1	1	11	215	0.0182389	-2.77527	9606	Homo sapiens	dhrs3a;ackr3b;rgs4;rdh10a;cxcr4a;f2;ahcyl1		R-HSA-392133;R-HSA-2465940;R-HSA-169683;R-HSA-392212;R-HSA-749448;R-HSA-749454;R-HSA-749452;R-HSA-74872;R-HSA-749456;R-HSA-380073;R-HSA-379048
R-HSA-168256	Immune System	25	2641	0.188872	1	1	74	1493	0.126654	-2.29919	9606	Homo sapiens	ghrb;sox2;cdh1;vamp8;ap1s3b;gstp1;sarm1;txn;padi2;TUBB4B;f2;ahcyl1;sigirr;tfa;psme4a;ampd3b;gata3;c9;alox12;lrmp;ctsla		R-HSA-1168789;R-HSA-982792;R-HSA-2130349;R-HSA-173709;R-HSA-6793975;R-HSA-1168768;R-HSA-6799350;R-HSA-1168640;R-HSA-982810;R-HSA-936985;R-HSA-1168777;R-HSA-982807;R-HSA-173723;R-HSA-173720;R-HSA-2130619;R-HSA-1678981;R-HSA-173725;R-HSA-1362485;R-HSA-2213248;R-HSA-199079;R-HSA-9008684;R-HSA-209061;R-HSA-2530445;R-HSA-2130706;R-HSA-6797269;R-HSA-1362465;R-HSA-1168423;R-HSA-9014320;R-HSA-9009072;R-H…
R-HSA-1430728	Metabolism	37	3585	0.256383	1	1	91	2184	0.185273	-2.29385	9606	Homo sapiens	gls2b;bckdk;ptgr1;bhmt;myl7;ahcyl1;cubn;ckmb;hsd3b1;ampd3b;degs2;slc23a1;alox12;elovl1a;slc26a1;acadvl;ftcd;atic;sult6b1;hadhb;star;arsj;slc22a21;gstp1;pla1a;txn;dbh;zgc:158423;psme4a;ASS1;ugp2b;dmgdh;tdh;sord		R-HSA-1482775;R-HSA-1614362;R-HSA-111751;R-HSA-77321;R-HSA-70920;R-HSA-9025152;R-HSA-5693148;R-HSA-3000103;R-HSA-2161964;R-HSA-70286;R-HSA-5696838;R-HSA-8963864;R-HSA-77329;R-HSA-2046094;R-HSA-9018907;R-HSA-2161844;R-HSA-70420;R-HSA-196372;R-HSA-2046088;R-HSA-109339;R-HSA-196126;R-HSA-77340;R-HSA-193052;R-HSA-109342;R-HSA-165026;R-HSA-2161794;R-HSA-427555;R-HSA-1614654;R-HSA-193961;R-HSA-6798667;…

## Sheet: SI Table 10c
Supporting Information Table S10c: Enrichment of Reactome pathways represented by differentially expressed genes
Day 15 1000 ug/L BPA
Compilation of Reactome (v66) pathways (for all differentially expressed genes)
Pathways were considered to be enriched when p-values adjusted for False Dicovery Rate (FDR) for multiple-testing were < 0.1
Pathway identifier	Pathway name	#Entities found	#Entities total	Entities ratio	Entities pValue	Entities FDR	#Reactions found	#Reactions total	Reactions ratio	Species identifier	Species name	Submitted entities found	Mapped entities	Found reaction identifiers
R-HSA-5579024	Defective MAT1A causes Methionine adenosyltransferase deficiency (MATD)	1	1	9.01469e-05	0.00288067	0.249389	1	1	8.69716e-05	9606	Homo sapiens	ENSDARG00000039605	Q00266	R-HSA-5603087
R-HSA-390522	Striated Muscle Contraction	2	36	0.00324529	0.00489645	0.249389	4	4	0.000347887	9606	Homo sapiens	ENSDARG00000001431;ENSDARG00000036371	Q08043;P68133	R-HSA-390597;R-HSA-390598;R-HSA-390593;R-HSA-390595
R-HSA-1368071	NR1D1 (REV-ERBA) represses gene expression	1	3	0.000270441	0.00861793	0.249389	1	1	8.69716e-05	9606	Homo sapiens	ENSDARG00000033160	P20393	R-HSA-5663252
R-HSA-2408508	Metabolism of ingested SeMet, Sec, MeSec into H2Se	1	8	0.000721176	0.0228215	0.249389	1	8	0.000695773	9606	Homo sapiens	ENSDARG00000039605	Q00266	R-HSA-2408551
R-HSA-381183	ATF6 (ATF6-alpha) activates chaperone genes	1	10	0.000901469	0.0284476	0.249389	1	5	0.000434858	9606	Homo sapiens	ENSDARG00000003570	P14625	R-HSA-1791163
R-HSA-2428933	SHC-related events triggered by IGF1R	1	11	0.000991616	0.0312488	0.249389	3	5	0.000434858	9606	Homo sapiens	ENSDARG00000027423	P08069	R-HSA-2404193;R-HSA-2404195;R-HSA-5686072
R-HSA-381033	ATF6 (ATF6-alpha) activates chaperones	1	12	0.00108176	0.0340422	0.249389	1	10	0.000869716	9606	Homo sapiens	ENSDARG00000003570	P14625	R-HSA-1791163
R-HSA-1679131	Trafficking and processing of endosomal TLR	1	13	0.00117191	0.0368278	0.249389	2	7	0.000608802	9606	Homo sapiens	ENSDARG00000003570	P14625	R-HSA-1678923;R-HSA-1678944
R-HSA-156581	Methylation	1	14	0.00126206	0.0396057	0.249389	1	12	0.00104366	9606	Homo sapiens	ENSDARG00000039605	Q00266	R-HSA-174391
R-HSA-3000480	Scavenging by Class A Receptors	1	19	0.00171279	0.0533789	0.249389	2	10	0.000869716	9606	Homo sapiens	ENSDARG00000003570	P14625	R-HSA-2173778;R-HSA-2507854
R-HSA-373753	Nephrin family interactions	1	23	0.00207338	0.0642594	0.249389	1	13	0.00113063	9606	Homo sapiens	ENSDARG00000001431	Q08043	R-HSA-451403
R-HSA-1614635	Sulfur amino acid metabolism	1	27	0.00243397	0.0750188	0.249389	1	36	0.00313098	9606	Homo sapiens	ENSDARG00000039605	Q00266	R-HSA-174391
R-HSA-5579029	Metabolic disorders of biological oxidation enzymes	1	35	0.00315514	0.0961792	0.249389	1	39	0.00339189	9606	Homo sapiens	ENSDARG00000039605	Q00266	R-HSA-5603087
R-HSA-397014	Muscle contraction	2	205	0.0184801	0.117797	0.249389	4	39	0.00339189	9606	Homo sapiens	ENSDARG00000001431;ENSDARG00000036371	Q08043;P68133	R-HSA-390597;R-HSA-390598;R-HSA-390593;R-HSA-390595
R-HSA-211733	Regulation of activated PAK-2p34 by proteasome mediated degradation	1	50	0.00450735	0.134598	0.249389	1	2	0.000173943	9606	Homo sapiens	ENSDARG00000087911	Q14997	R-HSA-211715
R-HSA-1236978	Cross-presentation of soluble exogenous antigens (endosomes)	1	50	0.00450735	0.134598	0.249389	1	5	0.000434858	9606	Homo sapiens	ENSDARG00000087911	Q14997	R-HSA-1236970
R-HSA-350562	Regulation of ornithine decarboxylase (ODC)	1	51	0.00459749	0.137102	0.249389	1	4	0.000347887	9606	Homo sapiens	ENSDARG00000087911	Q14997	R-HSA-353125
R-HSA-69229	Ubiquitin-dependent degradation of Cyclin D1	1	52	0.00468764	0.139599	0.249389	1	5	0.000434858	9606	Homo sapiens	ENSDARG00000087911	Q14997	R-HSA-75825
R-HSA-349425	Autodegradation of the E3 ubiquitin ligase COP1	1	52	0.00468764	0.139599	0.249389	1	5	0.000434858	9606	Homo sapiens	ENSDARG00000087911	Q14997	R-HSA-264458
R-HSA-75815	Ubiquitin-dependent degradation of Cyclin D	1	52	0.00468764	0.139599	0.249389	1	5	0.000434858	9606	Homo sapiens	ENSDARG00000087911	Q14997	R-HSA-75825
R-HSA-180534	Vpu mediated degradation of CD4	1	53	0.00477779	0.14209	0.249389	1	5	0.000434858	9606	Homo sapiens	ENSDARG00000087911	Q14997	R-HSA-180573
R-HSA-169911	Regulation of Apoptosis	1	53	0.00477779	0.14209	0.249389	1	5	0.000434858	9606	Homo sapiens	ENSDARG00000087911	Q14997	R-HSA-211715
R-HSA-69613	p53-Independent G1/S DNA damage checkpoint	1	53	0.00477779	0.14209	0.249389	1	5	0.000434858	9606	Homo sapiens	ENSDARG00000087911	Q14997	R-HSA-69600
R-HSA-69610	p53-Independent DNA Damage Response	1	53	0.00477779	0.14209	0.249389	1	5	0.000434858	9606	Homo sapiens	ENSDARG00000087911	Q14997	R-HSA-69600
R-HSA-69601	Ubiquitin Mediated Degradation of Phosphorylated Cdc25A	1	53	0.00477779	0.14209	0.249389	1	5	0.000434858	9606	Homo sapiens	ENSDARG00000087911	Q14997	R-HSA-69600
R-HSA-8854050	FBXL7 down-regulates AURKA during mitotic entry and in early mitosis	1	55	0.00495808	0.147049	0.249389	2	6	0.00052183	9606	Homo sapiens	ENSDARG00000087911	Q14997	R-HSA-8854071;R-HSA-8854044
R-HSA-174113	SCF-beta-TrCP mediated degradation of Emi1	1	55	0.00495808	0.147049	0.249389	1	3	0.000260915	9606	Homo sapiens	ENSDARG00000087911	Q14997	R-HSA-174203
R-HSA-4641257	Degradation of AXIN	1	55	0.00495808	0.147049	0.249389	2	8	0.000695773	9606	Homo sapiens	ENSDARG00000087911	Q14997	R-HSA-3640874;R-HSA-4641256
R-HSA-180585	Vif-mediated degradation of APOBEC3G	1	56	0.00504823	0.149518	0.249389	1	4	0.000347887	9606	Homo sapiens	ENSDARG00000087911	Q14997	R-HSA-180603
R-HSA-450408	AUF1 (hnRNP D0) binds and destabilizes mRNA	1	56	0.00504823	0.149518	0.249389	1	4	0.000347887	9606	Homo sapiens	ENSDARG00000087911	Q14997	R-HSA-450466
R-HSA-5362768	Hh mutants that don't undergo autocatalytic processing are degraded by ERAD	1	56	0.00504823	0.149518	0.249389	1	6	0.00052183	9606	Homo sapiens	ENSDARG00000087911	Q14997	R-HSA-5387392
R-HSA-4641258	Degradation of DVL	1	57	0.00513838	0.151981	0.249389	2	7	0.000608802	9606	Homo sapiens	ENSDARG00000087911	Q14997	R-HSA-1504193;R-HSA-4641260
R-HSA-69541	Stabilization of p53	1	57	0.00513838	0.151981	0.249389	1	15	0.00130457	9606	Homo sapiens	ENSDARG00000087911	Q14997	R-HSA-264458
R-HSA-2151201	Transcriptional activation of mitochondrial biogenesis	1	57	0.00513838	0.151981	0.249389	1	32	0.00278309	9606	Homo sapiens	ENSDARG00000033160	P20393	R-HSA-1368140
R-HSA-2428928	IRS-related events triggered by IGF1R	1	58	0.00522852	0.154436	0.249389	2	11	0.000956688	9606	Homo sapiens	ENSDARG00000027423	P08069	R-HSA-2428930;R-HSA-2428922
R-HSA-68827	CDT1 association with the CDC6:ORC:origin complex	1	59	0.00531867	0.156885	0.249389	1	3	0.000260915	9606	Homo sapiens	ENSDARG00000087911	Q14997	R-HSA-68825
R-HSA-5387390	Hh mutants abrogate ligand secretion	1	59	0.00531867	0.156885	0.249389	1	7	0.000608802	9606	Homo sapiens	ENSDARG00000087911	Q14997	R-HSA-5387392
R-HSA-5676590	NIK-->noncanonical NF-kB signaling	1	59	0.00531867	0.156885	0.249389	1	9	0.000782745	9606	Homo sapiens	ENSDARG00000087911	Q14997	R-HSA-5607731
R-HSA-5610780	Degradation of GLI1 by the proteasome	1	60	0.00540882	0.159326	0.249389	2	6	0.00052183	9606	Homo sapiens	ENSDARG00000087911	Q14997	R-HSA-5610758;R-HSA-5610760
R-HSA-5610785	GLI3 is processed to GLI3R by the proteasome	1	60	0.00540882	0.159326	0.249389	1	5	0.000434858	9606	Homo sapiens	ENSDARG00000087911	Q14997	R-HSA-5610754
R-HSA-5610783	Degradation of GLI2 by the proteasome	1	60	0.00540882	0.159326	0.249389	1	5	0.000434858	9606	Homo sapiens	ENSDARG00000087911	Q14997	R-HSA-5610757
R-HSA-5607761	Dectin-1 mediated noncanonical NF-kB signaling	1	60	0.00540882	0.159326	0.249389	1	9	0.000782745	9606	Homo sapiens	ENSDARG00000087911	Q14997	R-HSA-5607731
R-HSA-2428924	IGF1R signaling cascade	1	61	0.00549896	0.161761	0.249389	5	16	0.00139155	9606	Homo sapiens	ENSDARG00000027423	P08069	R-HSA-2404193;R-HSA-2404195;R-HSA-2428930;R-HSA-5686072;R-HSA-2428922
R-HSA-5678895	Defective CFTR causes cystic fibrosis	1	61	0.00549896	0.161761	0.249389	1	7	0.000608802	9606	Homo sapiens	ENSDARG00000087911	Q14997	R-HSA-8866858
R-HSA-2404192	Signaling by Type 1 Insulin-like Growth Factor 1 Receptor (IGF1R)	1	62	0.00558911	0.164189	0.249389	6	18	0.00156549	9606	Homo sapiens	ENSDARG00000027423	P08069	R-HSA-2404199;R-HSA-2404193;R-HSA-2404195;R-HSA-2428930;R-HSA-5686072;R-HSA-2428922
R-HSA-4608870	Asymmetric localization of PCP proteins	1	64	0.0057694	0.169025	0.249389	1	7	0.000608802	9606	Homo sapiens	ENSDARG00000087911	Q14997	R-HSA-4608855
R-HSA-5358346	Hedgehog ligand biogenesis	1	65	0.00585955	0.171433	0.249389	1	15	0.00130457	9606	Homo sapiens	ENSDARG00000087911	Q14997	R-HSA-5362448
R-HSA-1234176	Oxygen-dependent proline hydroxylation of Hypoxia-inducible Factor Alpha	1	66	0.0059497	0.173834	0.249389	1	12	0.00104366	9606	Homo sapiens	ENSDARG00000087911	Q14997	R-HSA-1234159
R-HSA-69580	p53-Dependent G1/S DNA damage checkpoint	1	66	0.0059497	0.173834	0.249389	1	22	0.00191338	9606	Homo sapiens	ENSDARG00000087911	Q14997	R-HSA-264458
R-HSA-69563	p53-Dependent G1 DNA Damage Response	1	66	0.0059497	0.173834	0.249389	1	22	0.00191338	9606	Homo sapiens	ENSDARG00000087911	Q14997	R-HSA-264458
R-HSA-174154	APC/C:Cdc20 mediated degradation of Securin	1	67	0.00603984	0.176228	0.249389	1	3	0.000260915	9606	Homo sapiens	ENSDARG00000087911	Q14997	R-HSA-174202
R-HSA-1169091	Activation of NF-kappaB in B cells	1	67	0.00603984	0.176228	0.249389	1	10	0.000869716	9606	Homo sapiens	ENSDARG00000087911	Q14997	R-HSA-1168640
R-HSA-5658442	Regulation of RAS by GAPs	1	68	0.00612999	0.178615	0.249389	1	5	0.000434858	9606	Homo sapiens	ENSDARG00000087911	Q14997	R-HSA-5658430
R-HSA-400253	Circadian Clock	1	68	0.00612999	0.178615	0.249389	11	59	0.00513133	9606	Homo sapiens	ENSDARG00000033160	P20393	R-HSA-400342;R-HSA-1368069;R-HSA-5663271;R-HSA-5663252;R-HSA-1368119;R-HSA-1368065;R-HSA-5663265;R-HSA-1368140;R-HSA-5663245;R-HSA-549475;R-HSA-5663258
R-HSA-68867	Assembly of the pre-replicative complex	1	68	0.00612999	0.178615	0.249389	1	12	0.00104366	9606	Homo sapiens	ENSDARG00000087911	Q14997	R-HSA-68825
R-HSA-69615	G1/S DNA Damage Checkpoints	1	68	0.00612999	0.178615	0.249389	2	27	0.00234823	9606	Homo sapiens	ENSDARG00000087911	Q14997	R-HSA-69600;R-HSA-264458
R-HSA-8948751	Regulation of PTEN stability and activity	1	69	0.00622014	0.180996	0.249389	1	13	0.00113063	9606	Homo sapiens	ENSDARG00000087911	Q14997	R-HSA-8850992
R-HSA-68949	Orc1 removal from chromatin	1	71	0.00640043	0.185737	0.249389	1	4	0.000347887	9606	Homo sapiens	ENSDARG00000087911	Q14997	R-HSA-68948
R-HSA-174178	APC/C:Cdh1 mediated degradation of Cdc20 and other APC/C:Cdh1 targeted proteins in late mitosis/early G1	1	72	0.00649058	0.188098	0.249389	2	4	0.000347887	9606	Homo sapiens	ENSDARG00000087911	Q14997	R-HSA-174105;R-HSA-188191
R-HSA-174184	Cdc20:Phospho-APC/C mediated degradation of Cyclin A	1	72	0.00649058	0.188098	0.249389	1	3	0.000260915	9606	Homo sapiens	ENSDARG00000087911	Q14997	R-HSA-174255
R-HSA-69017	CDK-mediated phosphorylation and removal of Cdc6	1	72	0.00649058	0.188098	0.249389	1	4	0.000347887	9606	Homo sapiens	ENSDARG00000087911	Q14997	R-HSA-69016
R-HSA-179419	APC:Cdc20 mediated degradation of cell cycle proteins prior to satisfation of the cell cycle checkpoint	1	73	0.00658073	0.190452	0.249389	1	6	0.00052183	9606	Homo sapiens	ENSDARG00000087911	Q14997	R-HSA-174255
R-HSA-8939902	Regulation of RUNX2 expression and activity	1	74	0.00667087	0.192799	0.249389	2	32	0.00278309	9606	Homo sapiens	ENSDARG00000087911	Q14997	R-HSA-9008110;R-HSA-9009362
R-HSA-176409	APC/C:Cdc20 mediated degradation of mitotic proteins	1	75	0.00676102	0.19514	0.249389	2	13	0.00113063	9606	Homo sapiens	ENSDARG00000087911	Q14997	R-HSA-174202;R-HSA-174255
R-HSA-2262749	Cellular response to hypoxia	1	75	0.00676102	0.19514	0.249389	1	20	0.00173943	9606	Homo sapiens	ENSDARG00000087911	Q14997	R-HSA-1234159
R-HSA-1234174	Regulation of Hypoxia-inducible Factor (HIF) by oxygen	1	75	0.00676102	0.19514	0.249389	1	20	0.00173943	9606	Homo sapiens	ENSDARG00000087911	Q14997	R-HSA-1234159
R-HSA-176814	Activation of APC/C and APC/C:Cdc20 mediated degradation of mitotic proteins	1	76	0.00685117	0.197475	0.249389	2	15	0.00130457	9606	Homo sapiens	ENSDARG00000087911	Q14997	R-HSA-174202;R-HSA-174255
R-HSA-5619084	ABC transporter disorders	1	76	0.00685117	0.197475	0.249389	1	22	0.00191338	9606	Homo sapiens	ENSDARG00000087911	Q14997	R-HSA-8866858
R-HSA-8852276	The role of GTSE1 in G2/M progression after G2 checkpoint	1	79	0.00712161	0.204438	0.249389	1	10	0.000869716	9606	Homo sapiens	ENSDARG00000087911	Q14997	R-HSA-8852354
R-HSA-176408	Regulation of APC/C activators between G1/S and early anaphase	1	80	0.00721176	0.206746	0.249389	1	14	0.0012176	9606	Homo sapiens	ENSDARG00000087911	Q14997	R-HSA-174203
R-HSA-1168372	Downstream signaling events of B Cell Receptor (BCR)	1	81	0.0073019	0.209048	0.249389	1	14	0.0012176	9606	Homo sapiens	ENSDARG00000087911	Q14997	R-HSA-1168640
R-HSA-195253	Degradation of beta-catenin by the destruction complex	1	82	0.00739205	0.211343	0.249389	1	22	0.00191338	9606	Homo sapiens	ENSDARG00000087911	Q14997	R-HSA-2130282
R-HSA-383280	Nuclear Receptor transcription pathway	1	84	0.00757234	0.215914	0.249389	1	1	8.69716e-05	9606	Homo sapiens	ENSDARG00000033160	P20393	R-HSA-376419
R-HSA-69002	DNA Replication Pre-Initiation	1	85	0.00766249	0.21819	0.249389	1	21	0.0018264	9606	Homo sapiens	ENSDARG00000087911	Q14997	R-HSA-68825
R-HSA-351202	Metabolism of polyamines	1	85	0.00766249	0.21819	0.249389	1	35	0.00304401	9606	Homo sapiens	ENSDARG00000087911	Q14997	R-HSA-353125
R-HSA-5632684	Hedgehog 'on' state	1	85	0.00766249	0.21819	0.249389	1	37	0.00321795	9606	Homo sapiens	ENSDARG00000087911	Q14997	R-HSA-5635868
R-HSA-174143	APC/C-mediated degradation of cell cycle proteins	1	86	0.00775264	0.22046	0.249389	5	38	0.00330492	9606	Homo sapiens	ENSDARG00000087911	Q14997	R-HSA-174202;R-HSA-174203;R-HSA-174105;R-HSA-188191;R-HSA-174255
R-HSA-453276	Regulation of mitotic cell cycle	1	86	0.00775264	0.22046	0.249389	5	38	0.00330492	9606	Homo sapiens	ENSDARG00000087911	Q14997	R-HSA-174202;R-HSA-174203;R-HSA-174105;R-HSA-188191;R-HSA-174255
R-HSA-450531	Regulation of mRNA stability by proteins that bind AU-rich elements	1	88	0.00793293	0.22498	0.249389	1	26	0.00226126	9606	Homo sapiens	ENSDARG00000087911	Q14997	R-HSA-450466
R-HSA-5687128	MAPK6/MAPK4 signaling	1	89	0.00802308	0.22723	0.249389	1	40	0.00347887	9606	Homo sapiens	ENSDARG00000087911	Q14997	R-HSA-5687112
R-HSA-69052	Switching of origins to a post-replicative state	1	90	0.00811322	0.229474	0.249389	2	9	0.000782745	9606	Homo sapiens	ENSDARG00000087911	Q14997	R-HSA-68948;R-HSA-69016
R-HSA-4086400	PCP/CE pathway	1	92	0.00829352	0.233943	0.249389	1	24	0.00208732	9606	Homo sapiens	ENSDARG00000087911	Q14997	R-HSA-4608855
R-HSA-381119	Unfolded Protein Response (UPR)	1	95	0.00856396	0.2406	0.249389	1	95	0.00826231	9606	Homo sapiens	ENSDARG00000003570	P14625	R-HSA-1791163
R-HSA-5689603	UCH proteinases	1	96	0.00865411	0.242807	0.249389	2	11	0.000956688	9606	Homo sapiens	ENSDARG00000087911	Q14997	R-HSA-5665854;R-HSA-5665871
R-HSA-1592230	Mitochondrial biogenesis	1	96	0.00865411	0.242807	0.249389	1	36	0.00313098	9606	Homo sapiens	ENSDARG00000033160	P20393	R-HSA-1368140
R-HSA-5607764	CLEC7A (Dectin-1) signaling	1	98	0.0088344	0.247201	0.249389	2	45	0.00391372	9606	Homo sapiens	ENSDARG00000087911	Q14997	R-HSA-5607731;R-HSA-5607724
R-HSA-8939236	RUNX1 regulates transcription of genes involved in differentiation of HSCs	1	99	0.00892455	0.249389	0.249389	1	15	0.00130457	9606	Homo sapiens	ENSDARG00000087911	Q14997	R-HSA-8957265
R-HSA-5668541	TNFR2 non-canonical NF-kB pathway	1	102	0.00919499	0.255916	0.255916	3	43	0.00373978	9606	Homo sapiens	ENSDARG00000087911	Q14997	R-HSA-5607731;R-HSA-5668481;R-HSA-5668520
R-HSA-9020702	Interleukin-1 signaling	1	102	0.00919499	0.255916	0.255916	1	45	0.00391372	9606	Homo sapiens	ENSDARG00000087911	Q14997	R-HSA-209061
R-HSA-382556	ABC-family proteins mediated transport	1	103	0.00928513	0.258079	0.258079	1	28	0.00243521	9606	Homo sapiens	ENSDARG00000087911	Q14997	R-HSA-8866553
R-HSA-5668914	Diseases of metabolism	1	105	0.00946543	0.262387	0.262387	1	114	0.00991477	9606	Homo sapiens	ENSDARG00000039605	Q00266	R-HSA-5603087
R-HSA-8957275	Post-translational protein phosphorylation	1	107	0.00964572	0.266671	0.266671	1	1	8.69716e-05	9606	Homo sapiens	ENSDARG00000003570	P14625	R-HSA-8952289
R-HSA-156580	Phase II - Conjugation of compounds	1	110	0.00991616	0.273052	0.273052	1	66	0.00574013	9606	Homo sapiens	ENSDARG00000039605	Q00266	R-HSA-174391
R-HSA-6785807	Interleukin-4 and Interleukin-13 signaling	1	111	0.0100063	0.275168	0.275168	1	46	0.0040007	9606	Homo sapiens	ENSDARG00000003570	P14625	R-HSA-6790038
R-HSA-5610787	Hedgehog 'off' state	1	114	0.0102768	0.281477	0.281477	4	32	0.00278309	9606	Homo sapiens	ENSDARG00000087911	Q14997	R-HSA-5610757;R-HSA-5610758;R-HSA-5610754;R-HSA-5610760
R-HSA-202424	Downstream TCR signaling	1	116	0.010457	0.285654	0.285654	1	24	0.00208732	9606	Homo sapiens	ENSDARG00000087911	Q14997	R-HSA-5607724
R-HSA-2408522	Selenoamino acid metabolism	1	118	0.0106373	0.289807	0.289807	1	23	0.00200035	9606	Homo sapiens	ENSDARG00000039605	Q00266	R-HSA-2408551
R-HSA-1989781	PPARA activates gene expression	1	118	0.0106373	0.289807	0.289807	1	41	0.00356584	9606	Homo sapiens	ENSDARG00000033160	P20393	R-HSA-1368065
R-HSA-71291	Metabolism of amino acids and derivatives	2	371	0.0334445	0.290464	0.290464	3	244	0.0212211	9606	Homo sapiens	ENSDARG00000087911;ENSDARG00000039605	Q14997;Q00266	R-HSA-353125;R-HSA-2408551;R-HSA-174391
R-HSA-69239	Synthesis of DNA	1	119	0.0107275	0.291875	0.291875	2	26	0.00226126	9606	Homo sapiens	ENSDARG00000087911	Q14997	R-HSA-68948;R-HSA-69016
R-HSA-400206	Regulation of lipid metabolism by Peroxisome proliferator-activated receptor alpha (PPARalpha)	1	120	0.0108176	0.293937	0.293937	1	44	0.00382675	9606	Homo sapiens	ENSDARG00000033160	P20393	R-HSA-1368065
R-HSA-8878166	Transcriptional regulation by RUNX2	1	121	0.0109078	0.295993	0.295993	2	84	0.00730562	9606	Homo sapiens	ENSDARG00000087911	Q14997	R-HSA-9008110;R-HSA-9009362
R-HSA-381426	Regulation of Insulin-like Growth Factor (IGF) transport and uptake by Insulin-like Growth Factor Binding Proteins (IGFBPs)	1	124	0.0111782	0.302126	0.302126	1	14	0.0012176	9606	Homo sapiens	ENSDARG00000003570	P14625	R-HSA-8952289
R-HSA-69306	DNA Replication	1	127	0.0114487	0.308208	0.308208	3	47	0.00408767	9606	Homo sapiens	ENSDARG00000087911	Q14997	R-HSA-68948;R-HSA-68825;R-HSA-69016
R-HSA-2173782	Binding and Uptake of Ligands by Scavenger Receptors	1	129	0.011629	0.312234	0.312234	2	33	0.00287006	9606	Homo sapiens	ENSDARG00000003570	P14625	R-HSA-2173778;R-HSA-2507854
R-HSA-1500931	Cell-Cell communication	1	130	0.0117191	0.314239	0.314239	1	60	0.0052183	9606	Homo sapiens	ENSDARG00000001431	Q08043	R-HSA-451403
R-HSA-202403	TCR signaling	1	137	0.0123501	0.328113	0.328113	1	52	0.00452253	9606	Homo sapiens	ENSDARG00000087911	Q14997	R-HSA-5607724
R-HSA-6807070	PTEN Regulation	1	139	0.0125304	0.332027	0.332027	1	56	0.00487041	9606	Homo sapiens	ENSDARG00000087911	Q14997	R-HSA-8850992
R-HSA-446652	Interleukin-1 family signaling	1	140	0.0126206	0.333975	0.333975	1	78	0.00678379	9606	Homo sapiens	ENSDARG00000087911	Q14997	R-HSA-209061
R-HSA-162909	Host Interactions of HIV factors	1	142	0.0128009	0.337856	0.337856	2	54	0.00469647	9606	Homo sapiens	ENSDARG00000087911	Q14997	R-HSA-180603;R-HSA-180573
R-HSA-3858494	Beta-catenin independent WNT signaling	1	143	0.012891	0.339788	0.339788	1	51	0.00443555	9606	Homo sapiens	ENSDARG00000087911	Q14997	R-HSA-4608855
R-HSA-5619115	Disorders of transmembrane transporters	1	144	0.0129812	0.341715	0.341715	1	88	0.0076535	9606	Homo sapiens	ENSDARG00000087911	Q14997	R-HSA-8866858
R-HSA-5358351	Signaling by Hedgehog	1	150	0.013522	0.353161	0.353161	6	82	0.00713168	9606	Homo sapiens	ENSDARG00000087911	Q14997	R-HSA-5610757;R-HSA-5362448;R-HSA-5610758;R-HSA-5610754;R-HSA-5635868;R-HSA-5610760
R-HSA-69481	G2/M Checkpoints	1	151	0.0136122	0.35505	0.35505	1	24	0.00208732	9606	Homo sapiens	ENSDARG00000087911	Q14997	R-HSA-8852354
R-HSA-1236974	ER-Phagosome pathway	1	152	0.0137023	0.356933	0.356933	1	10	0.000869716	9606	Homo sapiens	ENSDARG00000087911	Q14997	R-HSA-1236935
R-HSA-168898	Toll-like Receptor Cascades	1	155	0.0139728	0.362552	0.362552	2	180	0.0156549	9606	Homo sapiens	ENSDARG00000003570	P14625	R-HSA-1678923;R-HSA-1678944
R-HSA-69242	S Phase	1	161	0.0145137	0.373646	0.373646	3	54	0.00469647	9606	Homo sapiens	ENSDARG00000087911	Q14997	R-HSA-75825;R-HSA-68948;R-HSA-69016
R-HSA-449147	Signaling by Interleukins	2	457	0.0411972	0.381993	0.381993	2	491	0.0427031	9606	Homo sapiens	ENSDARG00000087911;ENSDARG00000003570	Q14997;P14625	R-HSA-6790038;R-HSA-209061
R-HSA-2871837	FCERI mediated NF-kB activation	1	167	0.0150545	0.384554	0.384554	1	19	0.00165246	9606	Homo sapiens	ENSDARG00000087911	Q14997	R-HSA-5607724
R-HSA-1236975	Antigen processing-Cross presentation	1	168	0.0151447	0.386354	0.386354	2	22	0.00191338	9606	Homo sapiens	ENSDARG00000087911	Q14997	R-HSA-1236935;R-HSA-1236970
R-HSA-109581	Apoptosis	1	171	0.0154151	0.391723	0.391723	1	126	0.0109584	9606	Homo sapiens	ENSDARG00000087911	Q14997	R-HSA-211715
R-HSA-9010553	Regulation of expression of SLITs and ROBOs	1	172	0.0155053	0.393503	0.393503	1	19	0.00165246	9606	Homo sapiens	ENSDARG00000087911	Q14997	R-HSA-9011313
R-HSA-5621481	C-type lectin receptors (CLRs)	1	173	0.0155954	0.395278	0.395278	2	68	0.00591407	9606	Homo sapiens	ENSDARG00000087911	Q14997	R-HSA-5607731;R-HSA-5607724
R-HSA-983705	Signaling by the B Cell Receptor (BCR)	1	175	0.0157757	0.398812	0.398812	1	43	0.00373978	9606	Homo sapiens	ENSDARG00000087911	Q14997	R-HSA-1168640
R-HSA-5357801	Programmed Cell Death	1	176	0.0158659	0.400571	0.400571	1	139	0.0120891	9606	Homo sapiens	ENSDARG00000087911	Q14997	R-HSA-211715
R-HSA-2467813	Separation of Sister Chromatids	1	190	0.0171279	0.424687	0.424687	1	8	0.000695773	9606	Homo sapiens	ENSDARG00000087911	Q14997	R-HSA-174202
R-HSA-69275	G2/M Transition	1	198	0.0178491	0.438043	0.438043	3	78	0.00678379	9606	Homo sapiens	ENSDARG00000087911	Q14997	R-HSA-8854071;R-HSA-8852354;R-HSA-8854044
R-HSA-453274	Mitotic G2-G2/M phases	1	200	0.0180294	0.441335	0.441335	3	80	0.00695773	9606	Homo sapiens	ENSDARG00000087911	Q14997	R-HSA-8854071;R-HSA-8852354;R-HSA-8854044
R-HSA-68882	Mitotic Anaphase	1	202	0.0182097	0.444608	0.444608	1	11	0.000956688	9606	Homo sapiens	ENSDARG00000087911	Q14997	R-HSA-174202
R-HSA-201681	TCF dependent signaling in response to WNT	1	202	0.0182097	0.444608	0.444608	4	71	0.00617499	9606	Homo sapiens	ENSDARG00000087911	Q14997	R-HSA-1504193;R-HSA-4641260;R-HSA-3640874;R-HSA-4641256
R-HSA-2555396	Mitotic Metaphase and Anaphase	1	203	0.0182998	0.446237	0.446237	1	12	0.00104366	9606	Homo sapiens	ENSDARG00000087911	Q14997	R-HSA-174202
R-HSA-5689880	Ub-specific processing proteases	1	205	0.0184801	0.449482	0.449482	1	40	0.00347887	9606	Homo sapiens	ENSDARG00000087911	Q14997	R-HSA-5689539
R-HSA-8878171	Transcriptional regulation by RUNX1	1	208	0.0187506	0.454316	0.454316	1	132	0.0114803	9606	Homo sapiens	ENSDARG00000087911	Q14997	R-HSA-8957265
R-HSA-2454202	Fc epsilon receptor (FCERI) signaling	1	217	0.0195619	0.46857	0.46857	1	63	0.00547921	9606	Homo sapiens	ENSDARG00000087911	Q14997	R-HSA-5607724
R-HSA-376176	Signaling by ROBO receptors	1	218	0.019652	0.470132	0.470132	1	59	0.00513133	9606	Homo sapiens	ENSDARG00000087911	Q14997	R-HSA-9011313
R-HSA-211859	Biological oxidations	1	223	0.0201028	0.477872	0.477872	1	174	0.0151331	9606	Homo sapiens	ENSDARG00000039605	Q00266	R-HSA-174391
R-HSA-8951664	Neddylation	1	236	0.0212747	0.497488	0.497488	2	31	0.00269612	9606	Homo sapiens	ENSDARG00000087911	Q14997	R-HSA-8956184;R-HSA-8956140
R-HSA-162906	HIV Infection	1	246	0.0221761	0.51209	0.51209	2	157	0.0136545	9606	Homo sapiens	ENSDARG00000087911	Q14997	R-HSA-180603;R-HSA-180573
R-HSA-5673001	RAF/MAP kinase cascade	1	259	0.0233481	0.530458	0.530458	1	39	0.00339189	9606	Homo sapiens	ENSDARG00000087911	Q14997	R-HSA-5658430
R-HSA-5684996	MAPK1/MAPK3 signaling	1	266	0.0239791	0.54007	0.54007	1	46	0.0040007	9606	Homo sapiens	ENSDARG00000087911	Q14997	R-HSA-5658430
R-HSA-1257604	PIP3 activates AKT signaling	1	272	0.02452	0.548156	0.548156	1	86	0.00747956	9606	Homo sapiens	ENSDARG00000087911	Q14997	R-HSA-8850992
R-HSA-69620	Cell Cycle Checkpoints	1	274	0.0247003	0.550821	0.550821	3	57	0.00495738	9606	Homo sapiens	ENSDARG00000087911	Q14997	R-HSA-69600;R-HSA-8852354;R-HSA-264458
R-HSA-5688426	Deubiquitination	1	282	0.0254214	0.561329	0.561329	3	77	0.00669682	9606	Homo sapiens	ENSDARG00000087911	Q14997	R-HSA-5689539;R-HSA-5665854;R-HSA-5665871
R-HSA-195721	Signaling by WNT	1	297	0.0267736	0.580392	0.580392	6	156	0.0135676	9606	Homo sapiens	ENSDARG00000087911	Q14997	R-HSA-4608855;R-HSA-1504193;R-HSA-4641260;R-HSA-2130282;R-HSA-3640874;R-HSA-4641256
R-HSA-1852241	Organelle biogenesis and maintenance	1	298	0.0268638	0.581634	0.581634	1	86	0.00747956	9606	Homo sapiens	ENSDARG00000033160	P20393	R-HSA-1368140
R-HSA-9006925	Intracellular signaling by second messengers	1	304	0.0274047	0.589011	0.589011	1	105	0.00913202	9606	Homo sapiens	ENSDARG00000087911	Q14997	R-HSA-8850992
R-HSA-5683057	MAPK family signaling cascades	1	305	0.0274948	0.590229	0.590229	2	86	0.00747956	9606	Homo sapiens	ENSDARG00000087911	Q14997	R-HSA-5658430;R-HSA-5687112
R-HSA-983168	Antigen processing: Ubiquitination & Proteasome degradation	1	309	0.0278554	0.595063	0.595063	1	9	0.000782745	9606	Homo sapiens	ENSDARG00000087911	Q14997	R-HSA-983150
R-HSA-68886	M Phase	1	371	0.0334445	0.663289	0.663289	1	66	0.00574013	9606	Homo sapiens	ENSDARG00000087911	Q14997	R-HSA-174202
R-HSA-1280215	Cytokine Signaling in Immune system	2	774	0.0697737	0.663996	0.663996	5	639	0.0555749	9606	Homo sapiens	ENSDARG00000087911;ENSDARG00000003570	Q14997;P14625	R-HSA-6790038;R-HSA-209061;R-HSA-5607731;R-HSA-5668481;R-HSA-5668520
R-HSA-5663202	Diseases of signal transduction	1	395	0.035608	0.686589	0.686589	1	291	0.0253087	9606	Homo sapiens	ENSDARG00000087911	Q14997	R-HSA-5387392
R-HSA-2262752	Cellular responses to stress	1	406	0.0365997	0.696738	0.696738	1	181	0.0157419	9606	Homo sapiens	ENSDARG00000087911	Q14997	R-HSA-1234159
R-HSA-983169	Class I MHC mediated antigen processing & presentation	1	440	0.0396647	0.726137	0.726137	3	47	0.00408767	9606	Homo sapiens	ENSDARG00000087911	Q14997	R-HSA-983150;R-HSA-1236935;R-HSA-1236970
R-HSA-5663205	Infectious disease	1	460	0.0414676	0.74212	0.74212	2	322	0.0280049	9606	Homo sapiens	ENSDARG00000087911	Q14997	R-HSA-180603;R-HSA-180573
R-HSA-9006934	Signaling by Receptor Tyrosine Kinases	1	471	0.0424592	0.750522	0.750522	6	631	0.0548791	9606	Homo sapiens	ENSDARG00000027423	P08069	R-HSA-2404199;R-HSA-2404193;R-HSA-2404195;R-HSA-2428930;R-HSA-5686072;R-HSA-2428922
R-HSA-8953897	Cellular responses to external stimuli	1	483	0.043541	0.759384	0.759384	1	251	0.0218299	9606	Homo sapiens	ENSDARG00000087911	Q14997	R-HSA-1234159
R-HSA-69278	Cell Cycle, Mitotic	1	515	0.0464257	0.781553	0.781553	11	322	0.0280049	9606	Homo sapiens	ENSDARG00000087911	Q14997	R-HSA-8854071;R-HSA-75825;R-HSA-8852354;R-HSA-68948;R-HSA-174202;R-HSA-69016;R-HSA-174203;R-HSA-8854044;R-HSA-174105;R-HSA-188191;R-HSA-174255
R-HSA-422475	Axon guidance	1	557	0.0502118	0.807666	0.807666	1	296	0.0257436	9606	Homo sapiens	ENSDARG00000087911	Q14997	R-HSA-9011313
R-HSA-1640170	Cell Cycle	1	622	0.0560714	0.84222	0.84222	13	411	0.0357453	9606	Homo sapiens	ENSDARG00000087911	Q14997	R-HSA-69600;R-HSA-8852354;R-HSA-174255;R-HSA-264458;R-HSA-8854071;R-HSA-75825;R-HSA-68948;R-HSA-174202;R-HSA-69016;R-HSA-174203;R-HSA-8854044;R-HSA-174105;R-HSA-188191
R-HSA-1643685	Disease	2	1158	0.10439	0.861117	0.861117	5	939	0.0816664	9606	Homo sapiens	ENSDARG00000087911;ENSDARG00000039605	Q14997;Q00266	R-HSA-5387392;R-HSA-180603;R-HSA-5603087;R-HSA-8866858;R-HSA-180573
R-HSA-8953854	Metabolism of RNA	1	673	0.0606689	0.865042	0.865042	1	187	0.0162637	9606	Homo sapiens	ENSDARG00000087911	Q14997	R-HSA-450466
R-HSA-168249	Innate Immune System	2	1180	0.106373	0.868459	0.868459	4	643	0.0559228	9606	Homo sapiens	ENSDARG00000087911;ENSDARG00000003570	Q14997;P14625	R-HSA-1678923;R-HSA-5607731;R-HSA-5607724;R-HSA-1678944
R-HSA-212436	Generic Transcription Pathway	2	1194	0.107635	0.872951	0.872951	4	725	0.0630544	9606	Homo sapiens	ENSDARG00000087911;ENSDARG00000033160	Q14997;P20393	R-HSA-376419;R-HSA-9008110;R-HSA-8957265;R-HSA-9009362
R-HSA-382551	Transport of small molecules	1	726	0.0654467	0.885361	0.885361	1	428	0.0372239	9606	Homo sapiens	ENSDARG00000087911	Q14997	R-HSA-8866553
R-HSA-556833	Metabolism of lipids	1	746	0.0672496	0.892231	0.892231	1	812	0.070621	9606	Homo sapiens	ENSDARG00000033160	P20393	R-HSA-1368065
R-HSA-5653656	Vesicle-mediated transport	1	757	0.0682412	0.895837	0.895837	2	251	0.0218299	9606	Homo sapiens	ENSDARG00000003570	P14625	R-HSA-2173778;R-HSA-2507854
R-HSA-73857	RNA Polymerase II Transcription	2	1316	0.118633	0.9067	0.9067	4	786	0.0683597	9606	Homo sapiens	ENSDARG00000087911;ENSDARG00000033160	Q14997;P20393	R-HSA-376419;R-HSA-9008110;R-HSA-8957265;R-HSA-9009362
R-HSA-597592	Post-translational protein modification	2	1417	0.127738	0.928299	0.928299	6	509	0.0442686	9606	Homo sapiens	ENSDARG00000087911;ENSDARG00000003570	Q14997;P14625	R-HSA-8956184;R-HSA-8956140;R-HSA-5689539;R-HSA-5665854;R-HSA-5665871;R-HSA-8952289
R-HSA-74160	Gene expression (Transcription)	2	1457	0.131344	0.935519	0.935519	4	896	0.0779266	9606	Homo sapiens	ENSDARG00000087911;ENSDARG00000033160	Q14997;P20393	R-HSA-376419;R-HSA-9008110;R-HSA-8957265;R-HSA-9009362
R-HSA-1280218	Adaptive Immune System	1	942	0.0849184	0.941559	0.941559	5	260	0.0226126	9606	Homo sapiens	ENSDARG00000087911	Q14997	R-HSA-983150;R-HSA-1168640;R-HSA-1236935;R-HSA-1236970;R-HSA-5607724
R-HSA-1430728	Metabolism	3	2116	0.190751	0.958681	0.958681	4	1952	0.169769	9606	Homo sapiens	ENSDARG00000087911;ENSDARG00000039605;ENSDARG00000033160	Q14997;Q00266;P20393	R-HSA-353125;R-HSA-2408551;R-HSA-1368065;R-HSA-174391
R-HSA-1266738	Developmental Biology	1	1054	0.0950149	0.959024	0.959024	1	483	0.0420073	9606	Homo sapiens	ENSDARG00000087911	Q14997	R-HSA-9011313
R-HSA-392499	Metabolism of proteins	2	2012	0.181376	0.986614	0.986614	7	867	0.0754044	9606	Homo sapiens	ENSDARG00000087911;ENSDARG00000003570	Q14997;P14625	R-HSA-8956184;R-HSA-1791163;R-HSA-8956140;R-HSA-5689539;R-HSA-5665854;R-HSA-5665871;R-HSA-8952289
R-HSA-168256	Immune System	2	2229	0.200938	0.993096	0.993096	12	1484	0.129066	9606	Homo sapiens	ENSDARG00000087911;ENSDARG00000003570	Q14997;P14625	R-HSA-983150;R-HSA-1168640;R-HSA-6790038;R-HSA-1678923;R-HSA-1236935;R-HSA-5607731;R-HSA-209061;R-HSA-5668481;R-HSA-1236970;R-HSA-5607724;R-HSA-1678944;R-HSA-5668520
R-HSA-162582	Signal Transduction	2	2746	0.247543	0.998714	0.998714	21	2116	0.184032	9606	Homo sapiens	ENSDARG00000027423;ENSDARG00000087911	Q14997;P08069	R-HSA-5362448;R-HSA-2404199;R-HSA-2404193;R-HSA-2404195;R-HSA-2428930;R-HSA-5658430;R-HSA-5635868;R-HSA-4641260;R-HSA-2130282;R-HSA-4641256;R-HSA-5686072;R-HSA-5610757;R-HSA-4608855;R-HSA-5610758;R-HSA-8850992;R-HSA-1504193;R-HSA-5610754;R-HSA-3640874;R-HSA-5610760;R-HSA-5687112;R-HSA-2428922

## Sheet: SI Table 10d
Supporting Information Table S10d: Enrichment of Reactome pathways represented by differentially expressed genes
Day 5 2.5 ug/L MBP
Compilation of Reactome (v66) pathways (for all differentially expressed genes)
Pathways were considered to be enriched when p-values adjusted for False Dicovery Rate (FDR) for multiple-testing were < 0.1
Pathway identifier	Pathway name	#Entities found	#Entities total	Entities ratio	Entities pValue	Entities FDR	#Reactions found	#Reactions total	Reactions ratio	Species identifier	Species name	Submitted entities found	Mapped entities	Found reaction identifiers
R-HSA-70268	Pyruvate metabolism	2	31	0.00279456	0.0002775	0.0036075	3	15	0.00130457	9606	Homo sapiens	ldha	P00338;Q9BYZ2	R-HSA-6807826;R-HSA-71849;R-HSA-70510
R-HSA-71406	Pyruvate metabolism and Citric Acid (TCA) cycle	2	55	0.00495808	0.000864723	0.00518834	3	36	0.00313098	9606	Homo sapiens	ldha	P00338;Q9BYZ2	R-HSA-6807826;R-HSA-71849;R-HSA-70510
R-HSA-1428517	The citric acid (TCA) cycle and respiratory electron transport	2	175	0.0157757	0.00832277	0.0332911	3	62	0.00539224	9606	Homo sapiens	ldha	P00338;Q9BYZ2	R-HSA-6807826;R-HSA-71849;R-HSA-70510
R-HSA-2129379	Molecules associated with elastic fibres	1	38	0.00342558	0.0304112	0.0624005	2	10	0.000869716	9606	Homo sapiens	emilin3	Q9NT22	R-HSA-2161282;R-HSA-2328048
R-HSA-3299685	Detoxification of Reactive Oxygen Species	1	39	0.00351573	0.0312002	0.0624005	1	32	0.00278309	9606	Homo sapiens	gpx8	Q8TED1	R-HSA-3341296
R-HSA-1566948	Elastic fibre formation	1	45	0.00405661	0.0359227	0.0718453	2	17	0.00147852	9606	Homo sapiens	emilin3	Q9NT22	R-HSA-2161282;R-HSA-2328048
R-HSA-6809371	Formation of the cornified envelope	1	129	0.011629	0.099922	0.099922	8	27	0.00234823	9606	Homo sapiens	zgc:77517	P05783	R-HSA-6810357;R-HSA-6814387;R-HSA-6811539;R-HSA-8942224;R-HSA-6814734;R-HSA-6814764;R-HSA-6814298;R-HSA-6810937
R-HSA-6805567	Keratinization	1	217	0.0195619	0.162892	0.162892	15	34	0.00295704	9606	Homo sapiens	zgc:77517	P05783	R-HSA-6806629;R-HSA-6805573;R-HSA-6814734;R-HSA-6814764;R-HSA-6805546;R-HSA-6806613;R-HSA-6810357;R-HSA-6814387;R-HSA-6811539;R-HSA-6806610;R-HSA-6809393;R-HSA-6809663;R-HSA-8942224;R-HSA-6814298;R-HSA-6810937
R-HSA-1474244	Extracellular matrix organization	1	301	0.0271342	0.219314	0.219314	2	318	0.027657	9606	Homo sapiens	emilin3	Q9NT22	R-HSA-2161282;R-HSA-2328048
R-HSA-2262752	Cellular responses to stress	1	406	0.0365997	0.285074	0.285074	1	181	0.0157419	9606	Homo sapiens	gpx8	Q8TED1	R-HSA-3341296
R-HSA-8953897	Cellular responses to external stimuli	1	483	0.043541	0.330119	0.330119	1	251	0.0218299	9606	Homo sapiens	gpx8	Q8TED1	R-HSA-3341296
R-HSA-1430728	Metabolism	2	2116	0.190751	0.535386	0.535386	3	1952	0.169769	9606	Homo sapiens	ldha	P00338;Q9BYZ2	R-HSA-6807826;R-HSA-71849;R-HSA-70510
R-HSA-1266738	Developmental Biology	1	1054	0.0950149	0.592833	0.592833	15	483	0.0420073	9606	Homo sapiens	zgc:77517	P05783	R-HSA-6806629;R-HSA-6805573;R-HSA-6814734;R-HSA-6814764;R-HSA-6805546;R-HSA-6806613;R-HSA-6810357;R-HSA-6814387;R-HSA-6811539;R-HSA-6806610;R-HSA-6809393;R-HSA-6809663;R-HSA-8942224;R-HSA-6814298;R-HSA-6810937

## Sheet: SI Table 10e
Supporting Information Table S10e: Enrichment of Reactome pathways represented by differentially expressed genes
Day 5 25 ug/L MBP
Compilation of Reactome (v66) pathways (for all differentially expressed genes)
Pathways were considered to be enriched when p-values adjusted for False Dicovery Rate (FDR) for multiple-testing were < 0.1
Pathway identifier	Pathway name	#Entities found	#Entities total	Entities ratio	Entities pValue	Entities FDR	#Reactions found	#Reactions total	Reactions ratio	Species identifier	Species name	Submitted entities found	Mapped entities	Found reaction identifiers
R-HSA-8948216	Collagen chain trimerization	8	44	0.00314668	1.40837e-08	2.63365e-06	6	28	0.0023753	9606	Homo sapiens	col2a1a;col8a2;col28a1a;col9a3;col9a2;col7a1;col11a2;col11a1a		R-HSA-8944266;R-HSA-8944218;R-HSA-8944255;R-HSA-8944229;R-HSA-8944263;R-HSA-2002401
R-HSA-2022090	Assembly of collagen fibrils and other multimeric structures	8	67	0.00479153	3.38739e-07	3.15028e-05	15	26	0.00220563	9606	Homo sapiens	col2a1a;col8a2;col9a3;col9a2;col7a1;col11a2;col1a1a;col11a1a		R-HSA-2299620;R-HSA-2213192;R-HSA-2213195;R-HSA-1474266;R-HSA-2396234;R-HSA-2213201;R-HSA-2213205;R-HSA-2214324;R-HSA-2213207;R-HSA-2213208;R-HSA-2243931;R-HSA-2213210;R-HSA-2214330;R-HSA-2002466;R-HSA-2395257
R-HSA-1650814	Collagen biosynthesis and modifying enzymes	8	76	0.00543517	8.64095e-07	4.05145e-05	26	51	0.00432643	9606	Homo sapiens	col2a1a;col8a2;col28a1a;col9a3;col9a2;col7a1;col11a2;col11a1a		R-HSA-8948232;R-HSA-8944266;R-HSA-8948234;R-HSA-2002460;R-HSA-8948224;R-HSA-8948226;R-HSA-8948228;R-HSA-8948230;R-HSA-8944263;R-HSA-8948231;R-HSA-8944218;R-HSA-2002440;R-HSA-1981128;R-HSA-1980233;R-HSA-1981120;R-HSA-1650808;R-HSA-2002428;R-HSA-2022073;R-HSA-2089971;R-HSA-8944229;R-HSA-1981104;R-HSA-8948219;R-HSA-8948222;R-HSA-8944255;R-HSA-1981157;R-HSA-2002401
R-HSA-1474290	Collagen formation	9	104	0.0074376	8.80751e-07	4.05145e-05	41	77	0.00653207	9606	Homo sapiens	col2a1a;col8a2;col28a1a;col9a3;col9a2;col7a1;col11a2;col1a1a;col11a1a		R-HSA-8948232;R-HSA-8944266;R-HSA-8948234;R-HSA-2002460;R-HSA-2299620;R-HSA-8948224;R-HSA-8948226;R-HSA-1474266;R-HSA-8948228;R-HSA-8948230;R-HSA-8944263;R-HSA-8948231;R-HSA-8944218;R-HSA-2214324;R-HSA-2002440;R-HSA-1981128;R-HSA-1980233;R-HSA-2214330;R-HSA-2395257;R-HSA-1981120;R-HSA-1650808;R-HSA-2002428;R-HSA-2022073;R-HSA-2213192;R-HSA-2213195;R-HSA-2089971;R-HSA-8944229;R-HSA-1981104;R-HSA-2…
R-HSA-1442490	Collagen degradation	7	69	0.00493456	5.41082e-06	0.0002002	10	34	0.00288429	9606	Homo sapiens	col2a1a;col8a2;col9a3;col9a2;col7a1;col11a2;col11a1a		R-HSA-2482180;R-HSA-1474196;R-HSA-1474197;R-HSA-1454757;R-HSA-1564179;R-HSA-2537499;R-HSA-1564169;R-HSA-2473594;R-HSA-1564184;R-HSA-1564120
R-HSA-6809371	Formation of the cornified envelope	8	138	0.00986913	6.22943e-05	0.00193112	8	27	0.00229046	9606	Homo sapiens	cyt1l;zgc:158846;krt4;krt5		R-HSA-6810357;R-HSA-6814387;R-HSA-6811539;R-HSA-8942224;R-HSA-6814734;R-HSA-6814764;R-HSA-6814298;R-HSA-6810937
R-HSA-1474244	Extracellular matrix organization	11	329	0.0235286	0.000354173	0.00920849	67	318	0.0269766	9606	Homo sapiens	col2a1a;col8a2;col28a1a;col9a3;col9a2;col7a1;col11a2;matn4;col1a1a;col11a1a;matn1		R-HSA-8948232;R-HSA-8944266;R-HSA-1474196;R-HSA-8948234;R-HSA-2002460;R-HSA-1474197;R-HSA-1564179;R-HSA-8948224;R-HSA-8948226;R-HSA-8948228;R-HSA-8948230;R-HSA-8944263;R-HSA-8948231;R-HSA-1564184;R-HSA-4084910;R-HSA-2214324;R-HSA-2327733;R-HSA-2002440;R-HSA-2424252;R-HSA-2327738;R-HSA-4084903;R-HSA-2466238;R-HSA-2214330;R-HSA-1564169;R-HSA-2466106;R-HSA-2482180;R-HSA-2022073;R-HSA-4084501;R-HSA-2…
R-HSA-1474228	Degradation of the extracellular matrix	7	148	0.0105843	0.000606337	0.0139457	10	105	0.00890736	9606	Homo sapiens	col2a1a;col8a2;col9a3;col9a2;col7a1;col11a2;col11a1a		R-HSA-2482180;R-HSA-1474196;R-HSA-1474197;R-HSA-1454757;R-HSA-1564179;R-HSA-2537499;R-HSA-1564169;R-HSA-2473594;R-HSA-1564184;R-HSA-1564120
R-HSA-3000178	ECM proteoglycans	5	79	0.00564972	0.00105122	0.0210244	5	23	0.00195114	9606	Homo sapiens	col2a1a;col9a3;col9a2;matn4;matn1		R-HSA-2396370;R-HSA-2327909;R-HSA-2424252;R-HSA-2466238;R-HSA-2466106
R-HSA-216083	Integrin cell surface interactions	5	86	0.00615033	0.00152412	0.0272586	6	54	0.00458093	9606	Homo sapiens	col2a1a;col8a2;col9a3;col9a2;col7a1		R-HSA-4084910;R-HSA-4086223;R-HSA-4086216;R-HSA-216043;R-HSA-4084903;R-HSA-2327695
R-HSA-6805567	Keratinization	8	226	0.0161625	0.00160345	0.0272586	15	34	0.00288429	9606	Homo sapiens	cyt1l;zgc:158846;krt4;krt5		R-HSA-6806629;R-HSA-6805573;R-HSA-6814734;R-HSA-6814764;R-HSA-6805546;R-HSA-6806613;R-HSA-6810357;R-HSA-6814387;R-HSA-6811539;R-HSA-6806610;R-HSA-6809393;R-HSA-6809663;R-HSA-8942224;R-HSA-6814298;R-HSA-6810937
R-HSA-8874081	MET activates PTK2 signaling	3	32	0.00228849	0.00375869	0.0563803	1	5	0.00042416	9606	Homo sapiens	col2a1a;col11a2;col11a1a		R-HSA-8874079
R-HSA-8963888	Chylomicron assembly	2	14	0.00100122	0.00818305	0.114563	3	5	0.00042416	9606	Homo sapiens	apoc2;mtp		R-HSA-174786;R-HSA-174660;R-HSA-174741
R-HSA-419037	NCAM1 interactions	3	44	0.00314668	0.00899334	0.114654	1	10	0.00084832	9606	Homo sapiens	col2a1a;col9a3;col9a2		R-HSA-375151
R-HSA-8875878	MET promotes cell motility	3	45	0.00321819	0.00955449	0.114654	1	12	0.00101798	9606	Homo sapiens	col2a1a;col11a2;col11a1a		R-HSA-8874079
R-HSA-156588	Glucuronidation	3	55	0.00393335	0.0162856	0.179141	4	9	0.000763488	9606	Homo sapiens	ugt1a7		R-HSA-174931;R-HSA-159194;R-HSA-159179;R-HSA-8941701
R-HSA-5657560	Hereditary fructose intolerance	1	2	0.000143031	0.018985	0.208835	1	1	8.4832e-05	9606	Homo sapiens	aldob		R-HSA-5656438
R-HSA-3000171	Non-integrin membrane-ECM interactions	3	61	0.00436244	0.0213235	0.213235	2	22	0.0018663	9606	Homo sapiens	col2a1a;col11a2;col11a1a		R-HSA-2465890;R-HSA-2327738
R-HSA-70263	Gluconeogenesis	3	67	0.00479153	0.0271206	0.233772	3	26	0.00220563	9606	Homo sapiens	aldob;pcxb;fbp1b		R-HSA-70501;R-HSA-71495;R-HSA-70479
R-HSA-375165	NCAM signaling for neurite out-growth	3	69	0.00493456	0.0292215	0.233772	1	23	0.00195114	9606	Homo sapiens	col2a1a;col9a3;col9a2		R-HSA-375151
R-HSA-186797	Signaling by PDGF	3	69	0.00493456	0.0292215	0.233772	1	28	0.0023753	9606	Homo sapiens	col2a1a;col9a3;col9a2		R-HSA-382054
R-HSA-211999	CYP2E1 reactions	2	30	0.00214546	0.0340321	0.238225	6	6	0.000508992	9606	Homo sapiens	cyp2y3		R-HSA-76416;R-HSA-76354;R-HSA-76434;R-HSA-76475;R-HSA-76397;R-HSA-143468
R-HSA-8963898	Plasma lipoprotein assembly	2	30	0.00214546	0.0340321	0.238225	4	19	0.00161181	9606	Homo sapiens	apoc2;mtp		R-HSA-174786;R-HSA-174660;R-HSA-174741;R-HSA-8866329
R-HSA-8963889	Assembly of active LPL and LIPC lipase complexes	2	30	0.00214546	0.0340321	0.238225	1	12	0.00101798	9606	Homo sapiens	apoc2		R-HSA-6784622
R-HSA-5579002	Defective UGT1A1 causes hyperbilirubinemia	1	4	0.000286062	0.0376122	0.263285	2	2	0.000169664	9606	Homo sapiens	ugt1a7		R-HSA-5604975;R-HSA-9036102
R-HSA-6806834	Signaling by MET	3	87	0.00622184	0.0518433	0.343881	1	49	0.00415677	9606	Homo sapiens	col2a1a;col11a2;col11a1a		R-HSA-8874079
R-HSA-174824	Plasma lipoprotein assembly, remodeling, and clearance	3	98	0.00700851	0.0688094	0.343881	8	84	0.00712589	9606	Homo sapiens	apoc2;mtp		R-HSA-174690;R-HSA-174786;R-HSA-174660;R-HSA-174757;R-HSA-174741;R-HSA-6784622;R-HSA-266303;R-HSA-8866329
R-HSA-75094	Formation of the Editosome	1	8	0.000572123	0.0738198	0.343881	2	2	0.000169664	9606	Homo sapiens	a1cf		R-HSA-77609;R-HSA-77608
R-HSA-3656244	Defective B4GALT1 causes B4GALT1-CDG (CDG-2d)	1	9	0.000643639	0.0826584	0.343881	3	3	0.000254496	9606	Homo sapiens	ogn		R-HSA-3656230;R-HSA-9035949;R-HSA-9035950
R-HSA-3656225	Defective CHST6 causes MCDC1	1	9	0.000643639	0.0826584	0.343881	1	1	8.4832e-05	9606	Homo sapiens	ogn		R-HSA-3656269
R-HSA-3656243	Defective ST3GAL3 causes MCT12 and EIEE15	1	9	0.000643639	0.0826584	0.343881	1	1	8.4832e-05	9606	Homo sapiens	ogn		R-HSA-3656258
R-HSA-8866423	VLDL assembly	1	9	0.000643639	0.0826584	0.343881	1	5	0.00042416	9606	Homo sapiens	mtp		R-HSA-8866329
R-HSA-72200	mRNA Editing: C to U Conversion	1	10	0.000715154	0.0914133	0.343881	3	3	0.000254496	9606	Homo sapiens	a1cf		R-HSA-77609;R-HSA-77608;R-HSA-83677
R-HSA-3371599	Defective HLCS causes multiple carboxylase deficiency	1	10	0.000715154	0.0914133	0.343881	1	4	0.000339328	9606	Homo sapiens	pcxb		R-HSA-9035988
R-HSA-8963899	Plasma lipoprotein remodeling	2	54	0.00386183	0.0952634	0.343881	4	30	0.00254496	9606	Homo sapiens	apoc2		R-HSA-174690;R-HSA-174757;R-HSA-6784622;R-HSA-266303
R-HSA-425986	Sodium/Proton exchangers	1	11	0.00078667	0.100085	0.343881	1	4	0.000339328	9606	Homo sapiens	slc9a1		R-HSA-425994
R-HSA-446107	Type I hemidesmosome assembly	1	11	0.00078667	0.100085	0.343881	1	6	0.000508992	9606	Homo sapiens	krt5		R-HSA-446077
R-HSA-75072	mRNA Editing	1	12	0.000858185	0.108675	0.343881	3	9	0.000763488	9606	Homo sapiens	a1cf		R-HSA-77609;R-HSA-77608;R-HSA-83677
R-HSA-3323169	Defects in biotin (Btn) metabolism	1	12	0.000858185	0.108675	0.343881	1	6	0.000508992	9606	Homo sapiens	pcxb		R-HSA-9035988
R-HSA-264870	Caspase-mediated cleavage of cytoskeletal proteins	1	12	0.000858185	0.108675	0.343881	1	10	0.00084832	9606	Homo sapiens	gsnb		R-HSA-201622
R-HSA-211994	Sterols are 12-hydroxylated by CYP8B1	1	13	0.0009297	0.117183	0.343881	3	3	0.000254496	9606	Homo sapiens	cyp8b1		R-HSA-193845;R-HSA-192157;R-HSA-193709
R-HSA-1236973	Cross-presentation of particulate exogenous antigens (phagosomes)	1	13	0.0009297	0.117183	0.343881	1	3	0.000254496	9606	Homo sapiens	cybb		R-HSA-1236967
R-HSA-190377	FGFR2b ligand binding and activation	1	14	0.00100122	0.125611	0.343881	2	3	0.000254496	9606	Homo sapiens	fgfbp2b		R-HSA-5656070;R-HSA-190260
R-HSA-75205	Dissolution of Fibrin Clot	1	14	0.00100122	0.125611	0.343881	1	19	0.00161181	9606	Homo sapiens	s100a10a		R-HSA-158750
R-HSA-8979227	Triglyceride metabolism	2	66	0.00472002	0.132415	0.343881	2	24	0.00203597	9606	Homo sapiens	fabp2;lpin1		R-HSA-75899;R-HSA-5334794
R-HSA-2214320	Anchoring fibril formation	1	15	0.00107273	0.133959	0.343881	4	4	0.000339328	9606	Homo sapiens	col7a1		R-HSA-2214324;R-HSA-2213195;R-HSA-2214330;R-HSA-2396234
R-HSA-1247673	Erythrocytes take up oxygen and release carbon dioxide	1	16	0.00114425	0.142228	0.343881	1	6	0.000508992	9606	Homo sapiens	hbbe2		R-HSA-1247668
R-HSA-70326	Glucose metabolism	3	139	0.00994064	0.149544	0.343881	4	50	0.0042416	9606	Homo sapiens	aldob;pcxb;fbp1b		R-HSA-70501;R-HSA-71495;R-HSA-71496;R-HSA-70479
R-HSA-8963901	Chylomicron remodeling	1	17	0.00121576	0.150418	0.343881	2	3	0.000254496	9606	Homo sapiens	apoc2		R-HSA-174690;R-HSA-174757
R-HSA-2160916	Hyaluronan uptake and degradation	1	18	0.00128728	0.158531	0.343881	2	9	0.000763488	9606	Homo sapiens	slc9a1		R-HSA-2160884;R-HSA-2160892
R-HSA-211981	Xenobiotics	2	74	0.00529214	0.15872	0.343881	16	22	0.0018663	9606	Homo sapiens	cyp2y3		R-HSA-76416;R-HSA-76354;R-HSA-76453;R-HSA-211910;R-HSA-212005;R-HSA-212004;R-HSA-76456;R-HSA-211881;R-HSA-76397;R-HSA-143468;R-HSA-76434;R-HSA-211991;R-HSA-211988;R-HSA-76475;R-HSA-211929;R-HSA-211966
R-HSA-2187335	The retinoid cycle in cones (daylight vision)	1	19	0.00135879	0.166567	0.343881	2	11	0.000933152	9606	Homo sapiens	opn1sw1		R-HSA-2465924;R-HSA-2465917
R-HSA-196780	Biotin transport and metabolism	1	19	0.00135879	0.166567	0.343881	1	13	0.00110282	9606	Homo sapiens	pcxb		R-HSA-2993802
R-HSA-189483	Heme degradation	1	20	0.00143031	0.174527	0.343881	2	5	0.00042416	9606	Homo sapiens	ugt1a7		R-HSA-159194;R-HSA-159179
R-HSA-2142816	Synthesis of (16-20)-hydroxyeicosatetraenoic acids (HETE)	1	20	0.00143031	0.174527	0.343881	1	3	0.000254496	9606	Homo sapiens	cyp2y3		R-HSA-2161814
R-HSA-70350	Fructose catabolism	1	20	0.00143031	0.174527	0.343881	1	5	0.00042416	9606	Homo sapiens	aldob		R-HSA-70342
R-HSA-975634	Retinoid metabolism and transport	2	79	0.00564972	0.175617	0.343881	12	28	0.0023753	9606	Homo sapiens	apoc2;rbp2a		R-HSA-975629;R-HSA-975608;R-HSA-2404131;R-HSA-2404140;R-HSA-2424254;R-HSA-2395768;R-HSA-2395784;R-HSA-2423785;R-HSA-2399913;R-HSA-2429643;R-HSA-975633;R-HSA-2855252
R-HSA-2022857	Keratan sulfate degradation	1	22	0.00157334	0.190221	0.343881	2	6	0.000508992	9606	Homo sapiens	ogn		R-HSA-2046239;R-HSA-1793217
R-HSA-4419969	Depolymerisation of the Nuclear Lamina	1	23	0.00164485	0.197956	0.343881	3	6	0.000508992	9606	Homo sapiens	lpin1		R-HSA-5195402;R-HSA-5221130;R-HSA-4419948
R-HSA-2142670	Synthesis of epoxy (EET) and dihydroxyeicosatrienoic acids (DHET)	1	23	0.00164485	0.197956	0.343881	1	3	0.000254496	9606	Homo sapiens	cyp2y3		R-HSA-2161899
R-HSA-2142845	Hyaluronan metabolism	1	23	0.00164485	0.197956	0.343881	2	12	0.00101798	9606	Homo sapiens	slc9a1		R-HSA-2160884;R-HSA-2160892
R-HSA-1480926	O2/CO2 exchange in erythrocytes	1	23	0.00164485	0.197956	0.343881	2	13	0.00110282	9606	Homo sapiens	hbbe2		R-HSA-1247668;R-HSA-1237325
R-HSA-1237044	Erythrocytes take up carbon dioxide and release oxygen	1	23	0.00164485	0.197956	0.343881	1	7	0.000593824	9606	Homo sapiens	hbbe2		R-HSA-1237325
R-HSA-2243919	Crosslinking of collagen fibrils	1	24	0.00171637	0.205618	0.343881	3	13	0.00110282	9606	Homo sapiens	col1a1a		R-HSA-2243931;R-HSA-2002466;R-HSA-2395257
R-HSA-8964058	HDL remodeling	1	24	0.00171637	0.205618	0.343881	1	13	0.00110282	9606	Homo sapiens	apoc2		R-HSA-266303
R-HSA-977225	Amyloid fiber formation	2	88	0.00629336	0.206672	0.343881	2	33	0.00279946	9606	Homo sapiens	gsnb;tgfbi		R-HSA-976734;R-HSA-977136
R-HSA-5668599	RHO GTPases Activate NADPH Oxidases	1	25	0.00178789	0.213208	0.343881	4	9	0.000763488	9606	Homo sapiens	cybb		R-HSA-5668629;R-HSA-5218827;R-HSA-5218841;R-HSA-5668605
R-HSA-211979	Eicosanoids	1	25	0.00178789	0.213208	0.343881	1	6	0.000508992	9606	Homo sapiens	cyp8b1		R-HSA-76496
R-HSA-2187338	Visual phototransduction	3	168	0.0120146	0.218601	0.343881	14	90	0.00763488	9606	Homo sapiens	opn1sw1;apoc2;rbp2a		R-HSA-2465924;R-HSA-975629;R-HSA-2404131;R-HSA-2404140;R-HSA-2395784;R-HSA-2423785;R-HSA-2399913;R-HSA-2429643;R-HSA-975608;R-HSA-2465917;R-HSA-2424254;R-HSA-2395768;R-HSA-975633;R-HSA-2855252
R-HSA-190241	FGFR2 ligand binding and activation	1	26	0.0018594	0.220725	0.343881	2	5	0.00042416	9606	Homo sapiens	fgfbp2b		R-HSA-5656070;R-HSA-190260
R-HSA-6806667	Metabolism of fat-soluble vitamins	2	94	0.00672245	0.227689	0.343881	12	34	0.00288429	9606	Homo sapiens	apoc2;rbp2a		R-HSA-975629;R-HSA-975608;R-HSA-2404131;R-HSA-2404140;R-HSA-2424254;R-HSA-2395768;R-HSA-2395784;R-HSA-2423785;R-HSA-2399913;R-HSA-2429643;R-HSA-975633;R-HSA-2855252
R-HSA-446728	Cell junction organization	2	94	0.00672245	0.227689	0.343881	3	37	0.00313879	9606	Homo sapiens	krt5;cdh17		R-HSA-446077;R-HSA-419002;R-HSA-419001
R-HSA-5652084	Fructose metabolism	1	27	0.00193092	0.228171	0.343881	1	7	0.000593824	9606	Homo sapiens	aldob		R-HSA-70342
R-HSA-9006934	Signaling by Receptor Tyrosine Kinases	7	518	0.037045	0.229694	0.343881	6	631	0.053529	9606	Homo sapiens	col2a1a;col9a3;col9a2;cybb;fgfbp2b;col11a2;col11a1a		R-HSA-5656070;R-HSA-382054;R-HSA-5218827;R-HSA-190260;R-HSA-5218841;R-HSA-8874079
R-HSA-3000157	Laminin interactions	1	31	0.00221698	0.257257	0.343881	2	15	0.00127248	9606	Homo sapiens	col7a1		R-HSA-3787997;R-HSA-4084501
R-HSA-211897	Cytochrome P450 - arranged by substrate type	3	186	0.0133019	0.264289	0.343881	20	62	0.00525959	9606	Homo sapiens	cyp8b1;cyp2y3		R-HSA-76416;R-HSA-76354;R-HSA-76453;R-HSA-211910;R-HSA-212005;R-HSA-212004;R-HSA-76456;R-HSA-211881;R-HSA-76397;R-HSA-143468;R-HSA-193709;R-HSA-76496;R-HSA-76434;R-HSA-211991;R-HSA-211988;R-HSA-193845;R-HSA-76475;R-HSA-211929;R-HSA-211966;R-HSA-192157
R-HSA-75109	Triglyceride biosynthesis	1	33	0.00236001	0.271389	0.343881	1	7	0.000593824	9606	Homo sapiens	lpin1		R-HSA-75899
R-HSA-1483213	Synthesis of PE	1	33	0.00236001	0.271389	0.343881	1	9	0.000763488	9606	Homo sapiens	lpin1		R-HSA-1483203
R-HSA-193807	Synthesis of bile acids and bile salts via 27-hydroxycholesterol	1	34	0.00243152	0.278354	0.343881	1	12	0.00101798	9606	Homo sapiens	cyp8b1		R-HSA-193845
R-HSA-8940973	RUNX2 regulates osteoblast differentiation	1	34	0.00243152	0.278354	0.343881	1	24	0.00203597	9606	Homo sapiens	satb2		R-HSA-8985275
R-HSA-8957275	Post-translational protein phosphorylation	2	109	0.00779518	0.280689	0.343881	1	1	8.4832e-05	9606	Homo sapiens	lgals2b;mfi2		R-HSA-8952289
R-HSA-418990	Adherens junctions interactions	1	35	0.00250304	0.285254	0.343881	2	16	0.00135731	9606	Homo sapiens	cdh17		R-HSA-419002;R-HSA-419001
R-HSA-2022854	Keratan sulfate biosynthesis	1	37	0.00264607	0.298857	0.343881	8	9	0.000763488	9606	Homo sapiens	ogn		R-HSA-2046175;R-HSA-2046222;R-HSA-2046285;R-HSA-2025724;R-HSA-2025723;R-HSA-2046298;R-HSA-2046265;R-HSA-2046180
R-HSA-5694530	Cargo concentration in the ER	1	37	0.00264607	0.298857	0.343881	4	12	0.00101798	9606	Homo sapiens	col7a1		R-HSA-5694436;R-HSA-5694435;R-HSA-5694522;R-HSA-5694427
R-HSA-111465	Apoptotic cleavage of cellular proteins	1	38	0.00271759	0.305562	0.343881	1	38	0.00322362	9606	Homo sapiens	gsnb		R-HSA-201622
R-HSA-390522	Striated Muscle Contraction	1	40	0.00286062	0.318781	0.343881	4	4	0.000339328	9606	Homo sapiens	mybpc1		R-HSA-390597;R-HSA-390598;R-HSA-390593;R-HSA-390595
R-HSA-5173214	O-glycosylation of TSR domain-containing proteins	1	41	0.00293213	0.325297	0.343881	1	2	0.000169664	9606	Homo sapiens	spon2b		R-HSA-5173192
R-HSA-163560	Triglyceride catabolism	1	42	0.00300365	0.331751	0.343881	1	17	0.00144214	9606	Homo sapiens	fabp2		R-HSA-5334794
R-HSA-3296482	Defects in vitamin and cofactor metabolism	1	42	0.00300365	0.331751	0.343881	1	22	0.0018663	9606	Homo sapiens	pcxb		R-HSA-9035988
R-HSA-193775	Synthesis of bile acids and bile salts via 24-hydroxycholesterol	1	43	0.00307516	0.338144	0.343881	1	28	0.0023753	9606	Homo sapiens	cyp8b1		R-HSA-193709
R-HSA-8941326	RUNX2 regulates bone development	1	43	0.00307516	0.338144	0.343881	1	32	0.00271463	9606	Homo sapiens	satb2		R-HSA-8985275
R-HSA-381426	Regulation of Insulin-like Growth Factor (IGF) transport and uptake by Insulin-like Growth Factor Binding Proteins (IGFBPs)	2	127	0.00908246	0.343881	0.343881	1	14	0.00118765	9606	Homo sapiens	lgals2b;mfi2		R-HSA-8952289
R-HSA-5668914	Diseases of metabolism	3	217	0.0155188	0.345001	0.345001	4	114	0.00967085	9606	Homo sapiens	ugt1a7;aldob;pcxb		R-HSA-5656438;R-HSA-5604975;R-HSA-9035988;R-HSA-9036102
R-HSA-71387	Metabolism of carbohydrates	5	413	0.0295359	0.362781	0.362781	17	213	0.0180692	9606	Homo sapiens	slc9a1;aldob;ogn;pcxb;fbp1b		R-HSA-2046239;R-HSA-2046175;R-HSA-2025724;R-HSA-70501;R-HSA-2025723;R-HSA-2046298;R-HSA-71495;R-HSA-2046265;R-HSA-70342;R-HSA-71496;R-HSA-70479;R-HSA-2046222;R-HSA-2046285;R-HSA-2160884;R-HSA-1793217;R-HSA-2046180;R-HSA-2160892
R-HSA-1500931	Cell-Cell communication	2	133	0.00951155	0.3646	0.3646	3	60	0.00508992	9606	Homo sapiens	krt5;cdh17		R-HSA-446077;R-HSA-419002;R-HSA-419001
R-HSA-3000480	Scavenging by Class A Receptors	1	48	0.00343274	0.369208	0.369208	2	10	0.00084832	9606	Homo sapiens	marco		R-HSA-2247510;R-HSA-2173781
R-HSA-1222556	ROS, RNS production in phagocytes	1	51	0.00364729	0.387147	0.387147	1	12	0.00101798	9606	Homo sapiens	cybb		R-HSA-1222376
R-HSA-1638074	Keratan sulfate/keratin metabolism	1	52	0.0037188	0.393013	0.393013	10	15	0.00127248	9606	Homo sapiens	ogn		R-HSA-2046239;R-HSA-2046175;R-HSA-2046222;R-HSA-2046285;R-HSA-2025724;R-HSA-2025723;R-HSA-2046298;R-HSA-2046265;R-HSA-1793217;R-HSA-2046180
R-HSA-3560782	Diseases associated with glycosaminoglycan metabolism	1	54	0.00386183	0.404579	0.404579	5	29	0.00246013	9606	Homo sapiens	ogn		R-HSA-3656230;R-HSA-9035949;R-HSA-3656258;R-HSA-9035950;R-HSA-3656269
R-HSA-189445	Metabolism of porphyrins	1	54	0.00386183	0.404579	0.404579	2	21	0.00178147	9606	Homo sapiens	ugt1a7		R-HSA-159194;R-HSA-159179
R-HSA-75153	Apoptotic execution phase	1	54	0.00386183	0.404579	0.404579	1	57	0.00483543	9606	Homo sapiens	gsnb		R-HSA-201622
R-HSA-1483191	Synthesis of PC	1	55	0.00393335	0.41028	0.41028	1	18	0.00152698	9606	Homo sapiens	lpin1		R-HSA-1483203
R-HSA-2162123	Synthesis of Prostaglandins (PG) and Thromboxanes (TX)	1	58	0.00414789	0.42706	0.42706	1	32	0.00271463	9606	Homo sapiens	cyp8b1		R-HSA-76496
R-HSA-211859	Biological oxidations	6	547	0.0391189	0.427239	0.427239	24	186	0.0157788	9606	Homo sapiens	cyp8b1;ugt1a7;cyp2y3		R-HSA-76416;R-HSA-76354;R-HSA-76453;R-HSA-211910;R-HSA-212005;R-HSA-212004;R-HSA-76456;R-HSA-159179;R-HSA-211881;R-HSA-76397;R-HSA-8941701;R-HSA-143468;R-HSA-193709;R-HSA-174931;R-HSA-76496;R-HSA-76434;R-HSA-211991;R-HSA-211988;R-HSA-193845;R-HSA-159194;R-HSA-76475;R-HSA-211929;R-HSA-211966;R-HSA-192157
R-HSA-197264	Nicotinamide salvaging	1	59	0.00421941	0.432547	0.432547	1	12	0.00101798	9606	Homo sapiens	cyp8b1		R-HSA-76496
R-HSA-4551638	SUMOylation of chromatin organization proteins	1	60	0.00429092	0.437982	0.437982	1	15	0.00127248	9606	Homo sapiens	satb2		R-HSA-4615900
R-HSA-156580	Phase II - Conjugation of compounds	3	258	0.018451	0.450229	0.450229	4	70	0.00593824	9606	Homo sapiens	ugt1a7		R-HSA-174931;R-HSA-159194;R-HSA-159179;R-HSA-8941701
R-HSA-2980766	Nuclear Envelope Breakdown	1	63	0.00450547	0.453979	0.453979	3	13	0.00110282	9606	Homo sapiens	lpin1		R-HSA-5195402;R-HSA-5221130;R-HSA-4419948
R-HSA-3299685	Detoxification of Reactive Oxygen Species	1	65	0.0046485	0.464391	0.464391	2	34	0.00288429	9606	Homo sapiens	cybb		R-HSA-6807557;R-HSA-1222376
R-HSA-2142753	Arachidonic acid metabolism	2	166	0.0118716	0.473232	0.473232	3	77	0.00653207	9606	Homo sapiens	cyp8b1;cyp2y3		R-HSA-76496;R-HSA-2161814;R-HSA-2161899
R-HSA-421270	Cell-cell junction organization	1	67	0.00479153	0.474607	0.474607	2	21	0.00178147	9606	Homo sapiens	cdh17		R-HSA-419002;R-HSA-419001
R-HSA-211976	Endogenous sterols	1	71	0.00507759	0.494461	0.494461	3	19	0.00161181	9606	Homo sapiens	cyp8b1		R-HSA-193845;R-HSA-192157;R-HSA-193709
R-HSA-196854	Metabolism of vitamins and cofactors	4	381	0.0272474	0.497498	0.497498	14	201	0.0170512	9606	Homo sapiens	cyp8b1;apoc2;pcxb;rbp2a		R-HSA-975629;R-HSA-2404131;R-HSA-2993802;R-HSA-2404140;R-HSA-2395784;R-HSA-2423785;R-HSA-2399913;R-HSA-2429643;R-HSA-76496;R-HSA-975608;R-HSA-2424254;R-HSA-2395768;R-HSA-975633;R-HSA-2855252
R-HSA-193368	Synthesis of bile acids and bile salts via 7alpha-hydroxycholesterol	1	76	0.00543517	0.518235	0.518235	1	39	0.00330845	9606	Homo sapiens	cyp8b1		R-HSA-192157
R-HSA-1630316	Glycosaminoglycan metabolism	2	182	0.0130158	0.521817	0.521817	12	82	0.00695623	9606	Homo sapiens	slc9a1;ogn		R-HSA-2046239;R-HSA-2046175;R-HSA-2046222;R-HSA-2046285;R-HSA-2025724;R-HSA-2160884;R-HSA-2025723;R-HSA-2046298;R-HSA-2046265;R-HSA-1793217;R-HSA-2046180;R-HSA-2160892
R-HSA-204005	COPII-mediated vesicle transport	1	77	0.00550669	0.522855	0.522855	10	16	0.00135731	9606	Homo sapiens	col7a1		R-HSA-5694439;R-HSA-5694418;R-HSA-203973;R-HSA-5694417;R-HSA-5694446;R-HSA-5694527;R-HSA-204008;R-HSA-5694522;R-HSA-5694441;R-HSA-5694409
R-HSA-5663084	Diseases of carbohydrate metabolism	1	80	0.00572123	0.536453	0.536453	1	44	0.00373261	9606	Homo sapiens	aldob		R-HSA-5656438
R-HSA-5579029	Metabolic disorders of biological oxidation enzymes	1	82	0.00586426	0.545303	0.545303	2	39	0.00330845	9606	Homo sapiens	ugt1a7		R-HSA-5604975;R-HSA-9036102
R-HSA-211945	Phase I - Functionalization of compounds	3	300	0.0214546	0.550425	0.550425	20	99	0.00839837	9606	Homo sapiens	cyp8b1;cyp2y3		R-HSA-76416;R-HSA-76354;R-HSA-76453;R-HSA-211910;R-HSA-212005;R-HSA-212004;R-HSA-76456;R-HSA-211881;R-HSA-76397;R-HSA-143468;R-HSA-193709;R-HSA-76496;R-HSA-76434;R-HSA-211991;R-HSA-211988;R-HSA-193845;R-HSA-76475;R-HSA-211929;R-HSA-211966;R-HSA-192157
R-HSA-196807	Nicotinate metabolism	1	86	0.00615033	0.562504	0.562504	1	29	0.00246013	9606	Homo sapiens	cyp8b1		R-HSA-76496
R-HSA-5654738	Signaling by FGFR2	1	87	0.00622184	0.566703	0.566703	2	46	0.00390227	9606	Homo sapiens	fgfbp2b		R-HSA-5656070;R-HSA-190260
R-HSA-1266738	Developmental Biology	11	1177	0.0841736	0.579573	0.579573	16	484	0.0410587	9606	Homo sapiens	cyt1l;zgc:158846;col2a1a;krt4;col9a3;col9a2;krt5		R-HSA-6806629;R-HSA-6805573;R-HSA-6814734;R-HSA-375151;R-HSA-6814764;R-HSA-6805546;R-HSA-6806613;R-HSA-6810357;R-HSA-6814387;R-HSA-6811539;R-HSA-6806610;R-HSA-6809393;R-HSA-6809663;R-HSA-8942224;R-HSA-6814298;R-HSA-6810937
R-HSA-5689603	UCH proteinases	1	98	0.00700851	0.610327	0.610327	2	11	0.000933152	9606	Homo sapiens	asxl1		R-HSA-5690790;R-HSA-5689630
R-HSA-190236	Signaling by FGFR	1	106	0.00758063	0.639288	0.639288	2	142	0.0120461	9606	Homo sapiens	fgfbp2b		R-HSA-5656070;R-HSA-190260
R-HSA-70171	Glycolysis	1	108	0.00772366	0.646188	0.646188	1	24	0.00203597	9606	Homo sapiens	aldob		R-HSA-71496
R-HSA-192105	Synthesis of bile acids and bile salts	1	111	0.00793821	0.656293	0.656293	3	83	0.00704106	9606	Homo sapiens	cyp8b1		R-HSA-193845;R-HSA-192157;R-HSA-193709
R-HSA-163125	Post-translational modification: synthesis of GPI-anchored proteins	1	115	0.00822427	0.669322	0.669322	1	16	0.00135731	9606	Homo sapiens	mfi2		R-HSA-8940388
R-HSA-194068	Bile acid and bile salt metabolism	1	121	0.00865336	0.687952	0.687952	3	94	0.00797421	9606	Homo sapiens	cyp8b1		R-HSA-193845;R-HSA-192157;R-HSA-193709
R-HSA-196849	Metabolism of water-soluble vitamins and cofactors	2	252	0.0180219	0.69757	0.69757	2	140	0.0118765	9606	Homo sapiens	cyp8b1;pcxb		R-HSA-76496;R-HSA-2993802
R-HSA-4420097	VEGFA-VEGFR2 Pathway	1	125	0.00893943	0.699789	0.699789	2	77	0.00653207	9606	Homo sapiens	cybb		R-HSA-5218827;R-HSA-5218841
R-HSA-68875	Mitotic Prophase	1	133	0.00951155	0.722143	0.722143	3	34	0.00288429	9606	Homo sapiens	lpin1		R-HSA-5195402;R-HSA-5221130;R-HSA-4419948
R-HSA-5173105	O-linked glycosylation	1	133	0.00951155	0.722143	0.722143	1	26	0.00220563	9606	Homo sapiens	spon2b		R-HSA-5173192
R-HSA-194138	Signaling by VEGF	1	134	0.00958307	0.724818	0.724818	2	83	0.00704106	9606	Homo sapiens	cybb		R-HSA-5218827;R-HSA-5218841
R-HSA-8878166	Transcriptional regulation by RUNX2	1	144	0.0102982	0.750205	0.750205	1	84	0.00712589	9606	Homo sapiens	satb2		R-HSA-8985275
R-HSA-199977	ER to Golgi Anterograde Transport	1	164	0.0117285	0.794213	0.794213	13	39	0.00330845	9606	Homo sapiens	col7a1		R-HSA-5694418;R-HSA-203973;R-HSA-5694417;R-HSA-5694527;R-HSA-204008;R-HSA-5694522;R-HSA-5694427;R-HSA-5694439;R-HSA-5694436;R-HSA-5694435;R-HSA-5694446;R-HSA-5694441;R-HSA-5694409
R-HSA-425393	Transport of inorganic cations/anions and amino acids/oligopeptides	1	165	0.0118	0.796199	0.796199	1	75	0.0063624	9606	Homo sapiens	slc9a1		R-HSA-425994
R-HSA-2173782	Binding and Uptake of Ligands by Scavenger Receptors	1	167	0.0119431	0.800113	0.800113	2	33	0.00279946	9606	Homo sapiens	marco		R-HSA-2247510;R-HSA-2173781
R-HSA-3108232	SUMO E3 ligases SUMOylate target proteins	1	178	0.0127297	0.820348	0.820348	1	130	0.0110282	9606	Homo sapiens	satb2		R-HSA-4615900
R-HSA-109581	Apoptosis	1	180	0.0128728	0.823803	0.823803	1	126	0.0106888	9606	Homo sapiens	gsnb		R-HSA-201622
R-HSA-1236975	Antigen processing-Cross presentation	1	186	0.0133019	0.833775	0.833775	1	23	0.00195114	9606	Homo sapiens	cybb		R-HSA-1236967
R-HSA-2990846	SUMOylation	1	187	0.0133734	0.835381	0.835381	1	139	0.0117917	9606	Homo sapiens	satb2		R-HSA-4615900
R-HSA-5357801	Programmed Cell Death	1	188	0.0134449	0.836973	0.836973	1	139	0.0117917	9606	Homo sapiens	gsnb		R-HSA-201622
R-HSA-6798695	Neutrophil degranulation	3	480	0.0343274	0.842144	0.842144	4	10	0.00084832	9606	Homo sapiens	gsnb;krt4;cybb		R-HSA-6799350;R-HSA-6800434;R-HSA-6798748;R-HSA-6798747
R-HSA-3781865	Diseases of glycosylation	1	194	0.013874	0.846205	0.846205	5	77	0.00653207	9606	Homo sapiens	ogn		R-HSA-3656230;R-HSA-9035949;R-HSA-3656258;R-HSA-9035950;R-HSA-3656269
R-HSA-948021	Transport to the Golgi and subsequent modification	1	219	0.0156619	0.879403	0.879403	13	60	0.00508992	9606	Homo sapiens	col7a1		R-HSA-5694418;R-HSA-203973;R-HSA-5694417;R-HSA-5694527;R-HSA-204008;R-HSA-5694522;R-HSA-5694427;R-HSA-5694439;R-HSA-5694436;R-HSA-5694435;R-HSA-5694446;R-HSA-5694441;R-HSA-5694409
R-HSA-1483206	Glycerophospholipid biosynthesis	1	222	0.0158764	0.882875	0.882875	1	133	0.0112827	9606	Homo sapiens	lpin1		R-HSA-1483203
R-HSA-397014	Muscle contraction	1	240	0.0171637	0.901717	0.901717	4	39	0.00330845	9606	Homo sapiens	mybpc1		R-HSA-390597;R-HSA-390598;R-HSA-390593;R-HSA-390595
R-HSA-418594	G alpha (i) signalling events	3	557	0.0398341	0.905643	0.905643	14	147	0.0124703	9606	Homo sapiens	opn1sw1;apoc2;rbp2a		R-HSA-2465924;R-HSA-975629;R-HSA-2404131;R-HSA-2404140;R-HSA-2395784;R-HSA-2423785;R-HSA-2399913;R-HSA-2429643;R-HSA-975608;R-HSA-2465917;R-HSA-2424254;R-HSA-2395768;R-HSA-975633;R-HSA-2855252
R-HSA-8978868	Fatty acid metabolism	2	429	0.0306801	0.919457	0.919457	3	217	0.0184086	9606	Homo sapiens	cyp8b1;cyp2y3		R-HSA-76496;R-HSA-2161814;R-HSA-2161899
R-HSA-422475	Axon guidance	3	583	0.0416935	0.921241	0.921241	1	297	0.0251951	9606	Homo sapiens	col2a1a;col9a3;col9a2		R-HSA-375151
R-HSA-5688426	Deubiquitination	1	288	0.0205964	0.938501	0.938501	2	77	0.00653207	9606	Homo sapiens	asxl1		R-HSA-5690790;R-HSA-5689630
R-HSA-1483257	Phospholipid metabolism	1	315	0.0225274	0.952792	0.952792	1	218	0.0184934	9606	Homo sapiens	lpin1		R-HSA-1483203
R-HSA-195258	RHO GTPase Effectors	1	316	0.0225989	0.953252	0.953252	4	107	0.00907703	9606	Homo sapiens	cybb		R-HSA-5668629;R-HSA-5218827;R-HSA-5218841;R-HSA-5668605
R-HSA-198933	Immunoregulatory interactions between a Lymphoid and a non-Lymphoid cell	1	316	0.0225989	0.953252	0.953252	1	43	0.00364778	9606	Homo sapiens	col2a1a		R-HSA-5696356
R-HSA-8957322	Metabolism of steroids	1	321	0.0229564	0.955489	0.955489	3	234	0.0198507	9606	Homo sapiens	cyp8b1		R-HSA-193845;R-HSA-192157;R-HSA-193709
R-HSA-382551	Transport of small molecules	5	960	0.0686548	0.956775	0.956775	11	430	0.0364778	9606	Homo sapiens	slc9a1;hbbe2;apoc2;mtp		R-HSA-174690;R-HSA-174786;R-HSA-174660;R-HSA-174757;R-HSA-1247668;R-HSA-174741;R-HSA-6784622;R-HSA-266303;R-HSA-425994;R-HSA-8866329;R-HSA-1237325
R-HSA-68886	M Phase	1	390	0.027891	0.977416	0.977416	3	66	0.00559891	9606	Homo sapiens	lpin1		R-HSA-5195402;R-HSA-5221130;R-HSA-4419948
R-HSA-425407	SLC-mediated transmembrane transport	1	412	0.0294643	0.981822	0.981822	1	184	0.0156091	9606	Homo sapiens	slc9a1		R-HSA-425994
R-HSA-446203	Asparagine N-linked glycosylation	1	421	0.030108	0.983368	0.983368	13	143	0.012131	9606	Homo sapiens	col7a1		R-HSA-5694418;R-HSA-203973;R-HSA-5694417;R-HSA-5694527;R-HSA-204008;R-HSA-5694522;R-HSA-5694427;R-HSA-5694439;R-HSA-5694436;R-HSA-5694435;R-HSA-5694446;R-HSA-5694441;R-HSA-5694409
R-HSA-194315	Signaling by Rho GTPases	1	447	0.0319674	0.987139	0.987139	4	112	0.00950119	9606	Homo sapiens	cybb		R-HSA-5668629;R-HSA-5218827;R-HSA-5218841;R-HSA-5668605
R-HSA-983169	Class I MHC mediated antigen processing & presentation	1	464	0.0331832	0.989133	0.989133	1	48	0.00407194	9606	Homo sapiens	cybb		R-HSA-1236967
R-HSA-2262752	Cellular responses to stress	1	512	0.0366159	0.993253	0.993253	2	184	0.0156091	9606	Homo sapiens	cybb		R-HSA-6807557;R-HSA-1222376
R-HSA-69278	Cell Cycle, Mitotic	1	570	0.0407638	0.996215	0.996215	3	322	0.0273159	9606	Homo sapiens	lpin1		R-HSA-5195402;R-HSA-5221130;R-HSA-4419948
R-HSA-5653656	Vesicle-mediated transport	2	820	0.0586426	0.997157	0.997157	15	251	0.0212928	9606	Homo sapiens	marco;col7a1		R-HSA-5694418;R-HSA-203973;R-HSA-5694417;R-HSA-5694527;R-HSA-204008;R-HSA-5694522;R-HSA-5694427;R-HSA-5694439;R-HSA-5694436;R-HSA-2247510;R-HSA-2173781;R-HSA-5694435;R-HSA-5694446;R-HSA-5694441;R-HSA-5694409
R-HSA-8953897	Cellular responses to external stimuli	1	599	0.0428377	0.997168	0.997168	2	254	0.0215473	9606	Homo sapiens	cybb		R-HSA-6807557;R-HSA-1222376
R-HSA-199991	Membrane Trafficking	1	661	0.0472717	0.99848	0.99848	13	218	0.0184934	9606	Homo sapiens	col7a1		R-HSA-5694418;R-HSA-203973;R-HSA-5694417;R-HSA-5694527;R-HSA-204008;R-HSA-5694522;R-HSA-5694427;R-HSA-5694439;R-HSA-5694436;R-HSA-5694435;R-HSA-5694446;R-HSA-5694441;R-HSA-5694409
R-HSA-597592	Post-translational protein modification	6	1591	0.113781	0.998493	0.998493	19	521	0.0441975	9606	Homo sapiens	lgals2b;mfi2;satb2;asxl1;spon2b;col7a1		R-HSA-5694418;R-HSA-203973;R-HSA-5173192;R-HSA-5694417;R-HSA-5689630;R-HSA-8952289;R-HSA-5694527;R-HSA-204008;R-HSA-5694522;R-HSA-8940388;R-HSA-5694427;R-HSA-5690790;R-HSA-5694439;R-HSA-5694436;R-HSA-5694435;R-HSA-5694446;R-HSA-4615900;R-HSA-5694441;R-HSA-5694409
R-HSA-1640170	Cell Cycle	1	682	0.0487735	0.99877	0.99877	3	411	0.034866	9606	Homo sapiens	lpin1		R-HSA-5195402;R-HSA-5221130;R-HSA-4419948
R-HSA-1280218	Adaptive Immune System	2	997	0.0713009	0.99944	0.99944	2	261	0.0221412	9606	Homo sapiens	col2a1a;cybb		R-HSA-5696356;R-HSA-1236967
R-HSA-8953854	Metabolism of RNA	1	782	0.0559251	0.999552	0.999552	3	187	0.0158636	9606	Homo sapiens	a1cf		R-HSA-77609;R-HSA-77608;R-HSA-83677
R-HSA-556833	Metabolism of lipids	4	1433	0.102482	0.999635	0.999635	9	942	0.0799118	9606	Homo sapiens	cyp8b1;fabp2;cyp2y3;lpin1		R-HSA-76496;R-HSA-1483203;R-HSA-2161814;R-HSA-193845;R-HSA-75899;R-HSA-5334794;R-HSA-2161899;R-HSA-192157;R-HSA-193709
R-HSA-109582	Hemostasis	1	812	0.0580705	0.99967	0.99967	1	327	0.0277401	9606	Homo sapiens	s100a10a		R-HSA-158750
R-HSA-168249	Innate Immune System	3	1302	0.0931131	0.999777	0.999777	5	651	0.0552257	9606	Homo sapiens	gsnb;krt4;cybb		R-HSA-6799350;R-HSA-6800434;R-HSA-1222376;R-HSA-6798748;R-HSA-6798747
R-HSA-1643685	Disease	4	1525	0.109061	0.999834	0.999834	9	953	0.0808449	9606	Homo sapiens	ugt1a7;aldob;ogn;pcxb		R-HSA-5656438;R-HSA-3656230;R-HSA-9035949;R-HSA-3656258;R-HSA-9035950;R-HSA-5604975;R-HSA-3656269;R-HSA-9035988;R-HSA-9036102
R-HSA-388396	GPCR downstream signalling	3	1344	0.0961167	0.999847	0.999847	14	215	0.0182389	9606	Homo sapiens	opn1sw1;apoc2;rbp2a		R-HSA-2465924;R-HSA-975629;R-HSA-2404131;R-HSA-2404140;R-HSA-2395784;R-HSA-2423785;R-HSA-2399913;R-HSA-2429643;R-HSA-975608;R-HSA-2465917;R-HSA-2424254;R-HSA-2395768;R-HSA-975633;R-HSA-2855252
R-HSA-372790	Signaling by GPCR	3	1447	0.103483	0.999941	0.999941	14	388	0.0329148	9606	Homo sapiens	opn1sw1;apoc2;rbp2a		R-HSA-2465924;R-HSA-975629;R-HSA-2404131;R-HSA-2404140;R-HSA-2395784;R-HSA-2423785;R-HSA-2399913;R-HSA-2429643;R-HSA-975608;R-HSA-2465917;R-HSA-2424254;R-HSA-2395768;R-HSA-975633;R-HSA-2855252
R-HSA-392499	Metabolism of proteins	8	2342	0.167489	0.999949	0.999949	21	883	0.0749067	9606	Homo sapiens	gsnb;lgals2b;mfi2;satb2;asxl1;spon2b;tgfbi;col7a1		R-HSA-5694418;R-HSA-203973;R-HSA-5173192;R-HSA-5694417;R-HSA-5689630;R-HSA-8952289;R-HSA-5694527;R-HSA-204008;R-HSA-5694522;R-HSA-8940388;R-HSA-5694427;R-HSA-5690790;R-HSA-976734;R-HSA-5694439;R-HSA-5694436;R-HSA-5694435;R-HSA-5694446;R-HSA-4615900;R-HSA-977136;R-HSA-5694441;R-HSA-5694409
R-HSA-1430728	Metabolism	15	3585	0.256383	0.99999	0.99999	59	2184	0.185273	9606	Homo sapiens	cyp8b1;slc9a1;ugt1a7;fabp2;apoc2;aldob;ogn;pcxb;rbp2a;fbp1b;cyp2y3;lpin1		R-HSA-2046239;R-HSA-76416;R-HSA-975629;R-HSA-2404131;R-HSA-2404140;R-HSA-8941701;R-HSA-2399913;R-HSA-2046222;R-HSA-76434;R-HSA-211991;R-HSA-211988;R-HSA-2424254;R-HSA-192157;R-HSA-975633;R-HSA-76453;R-HSA-212005;R-HSA-2046265;R-HSA-2993802;R-HSA-212004;R-HSA-76456;R-HSA-211881;R-HSA-2395784;R-HSA-193709;R-HSA-2161814;R-HSA-193845;R-HSA-76475;R-HSA-2046175;R-HSA-76354;R-HSA-211910;R-HSA-2046298;R-…
R-HSA-162582	Signal Transduction	10	3158	0.225846	0.999999	0.999999	22	2130	0.180692	9606	Homo sapiens	opn1sw1;col2a1a;apoc2;col9a3;col9a2;cybb;fgfbp2b;col11a2;rbp2a;col11a1a		R-HSA-2465924;R-HSA-382054;R-HSA-975629;R-HSA-5668629;R-HSA-5218827;R-HSA-2404131;R-HSA-2404140;R-HSA-5668605;R-HSA-2395784;R-HSA-2423785;R-HSA-2399913;R-HSA-2429643;R-HSA-5656070;R-HSA-190260;R-HSA-975608;R-HSA-5218841;R-HSA-8874079;R-HSA-2465917;R-HSA-2424254;R-HSA-2395768;R-HSA-975633;R-HSA-2855252
R-HSA-212436	Generic Transcription Pathway	1	1454	0.103983	1	1	1	726	0.0615881	9606	Homo sapiens	satb2		R-HSA-8985275
R-HSA-73857	RNA Polymerase II Transcription	1	1593	0.113924	1	1	1	787	0.0667628	9606	Homo sapiens	satb2		R-HSA-8985275
R-HSA-74160	Gene expression (Transcription)	1	1751	0.125223	1	1	1	898	0.0761792	9606	Homo sapiens	satb2		R-HSA-8985275
R-HSA-168256	Immune System	4	2641	0.188872	1	1	7	1493	0.126654	9606	Homo sapiens	gsnb;col2a1a;krt4;cybb		R-HSA-6799350;R-HSA-5696356;R-HSA-6800434;R-HSA-1236967;R-HSA-1222376;R-HSA-6798748;R-HSA-6798747

[truncated: 10 more sheets: SI Table 11a, SI Table 11b, SI Table 11c, SI Table 11d, SI Table 11e, SI Table 11f, SI Table 12a, SI Table 12b, SI Table 12c, SI Table 12d]
